# Supplementary material for: Ecological and socioeconomic factors associated with the human burden of environmentally mediated pathogens: a global analysis
Source: PubMed Central journal article supplement (PMC9669458; doi:10.1016/s2542-5196(22)00248-0), 2022-11-10

# THE LANCET

## Planetary Health

### Supplementary appendix

This appendix formed part of the original submission and has been peer reviewed. We post it as supplied by the authors.

Supplement to: Sokolow SH, Nova N, Jones IJ. Ecological and socioeconomic factors associated with the human burden of environmentally mediated pathogens: a global analysis. *Lancet Planet Health* 2022; **6**: e870–79.

## Supplemental methods, tables and figures

### The partial least squares structural equation modeling approach:

Structural Equation modeling (SEM) is a statistical approach with two key features: 1) like path analysis (which is a type of SEM) can be used to analyze a network of interacting variables, i.e. it allows for more than one dependent variable in a single analysis (and a variable can simultaneously act as a dependent and an independent variable); and 2) SEM adds the ability to create latent (or composite) variables. There are a couple of different types of latent variables, but in short, a latent variable is not directly measured, but is informed by other correlated or complimentary variables. The latent variables considered here (e.g. 'health care access' or 'land area in agriculture'), along with their correlated measurement variables are shown in Table S3 (e.g. for the latent variable 'land area in agriculture': measurement variables were World bank indicator AG.LND.CROP.ZS "Permanent cropland," as % of total land area, and World Bank indicator AG.LND.AGRI.ZS "Agricultural land," as % of total land area).

SEM models, like regression models, are based on *a priori* hypotheses about how a system works. Here, we defined a full *a priori* model (Table S4). We reduced the full model by removing paths that were non-significant by bootstrapping at an alpha of  $>0.05$  (although we chose to retain one and only marginal effect, that of biodiversity on environmentally mediated disease burden, with a  $p = 0.07$  due to interest in this relationship within the disease ecological field), then re-ran the SEM and reported the final model  $R^2$  for each variable fit (Table S5) and weights and  $p$  values for each direct and indirect path between predictors and disease burdens (Table S6).

A particular type of SEM, partial least squares SEM, or PLS-SEM, was used here because it is more flexible with respect to distributional assumptions than traditional (covariance based) SEM, and therefore more appropriate for the complex and non-normal epidemiological data and predictor variables (Garson 2016). Needless to say, we have a limited sample size due to limit in the number of countries around the world. Simulation studies comparing PLS-SEM and covariance-based SEM tend to confirm that PLS serves prediction purposes well even when sample size is small (e.g. 100) (Reinartz, Haenlein et al. 2009). In addition, resampling methods, like bootstrapping used here, to determine significance do not have specific sample size requirements but the larger the sample, the more reliable the PLS estimates and the less likely that confidence intervals are fit to noise in the data instead of the underlying distribution (Garson 2016).

References for this section:

Garson, G. D. (2016). Partial Least Squares: Regression & Structural Equation Models. Asheboro, NC, Statistical Publishing Associates.

Jenkins, C. N., S. L. Pimm and L. N. Joppa (2013). "Global patterns of terrestrial vertebrate diversity and conservation." Proc Natl Acad Sci U S A **110**(28): E2602-2610.

Reinartz, W., M. Haenlein and J. Henseler (2009). "An empirical comparison of the efficacy of covariance-based and variance-based SEM." International journal of Research in Marketing **26**(4): 332-344.

Wood, C. L., A. McInturff, H. S. Young, D. Kim and K. D. Lafferty (2017). "Human infectious disease burdens decrease with urbanization but not with biodiversity." Philosophical Transactions of the Royal Society B-Biological Sciences **372**(1722).

Flow chart of data used in this manuscript:

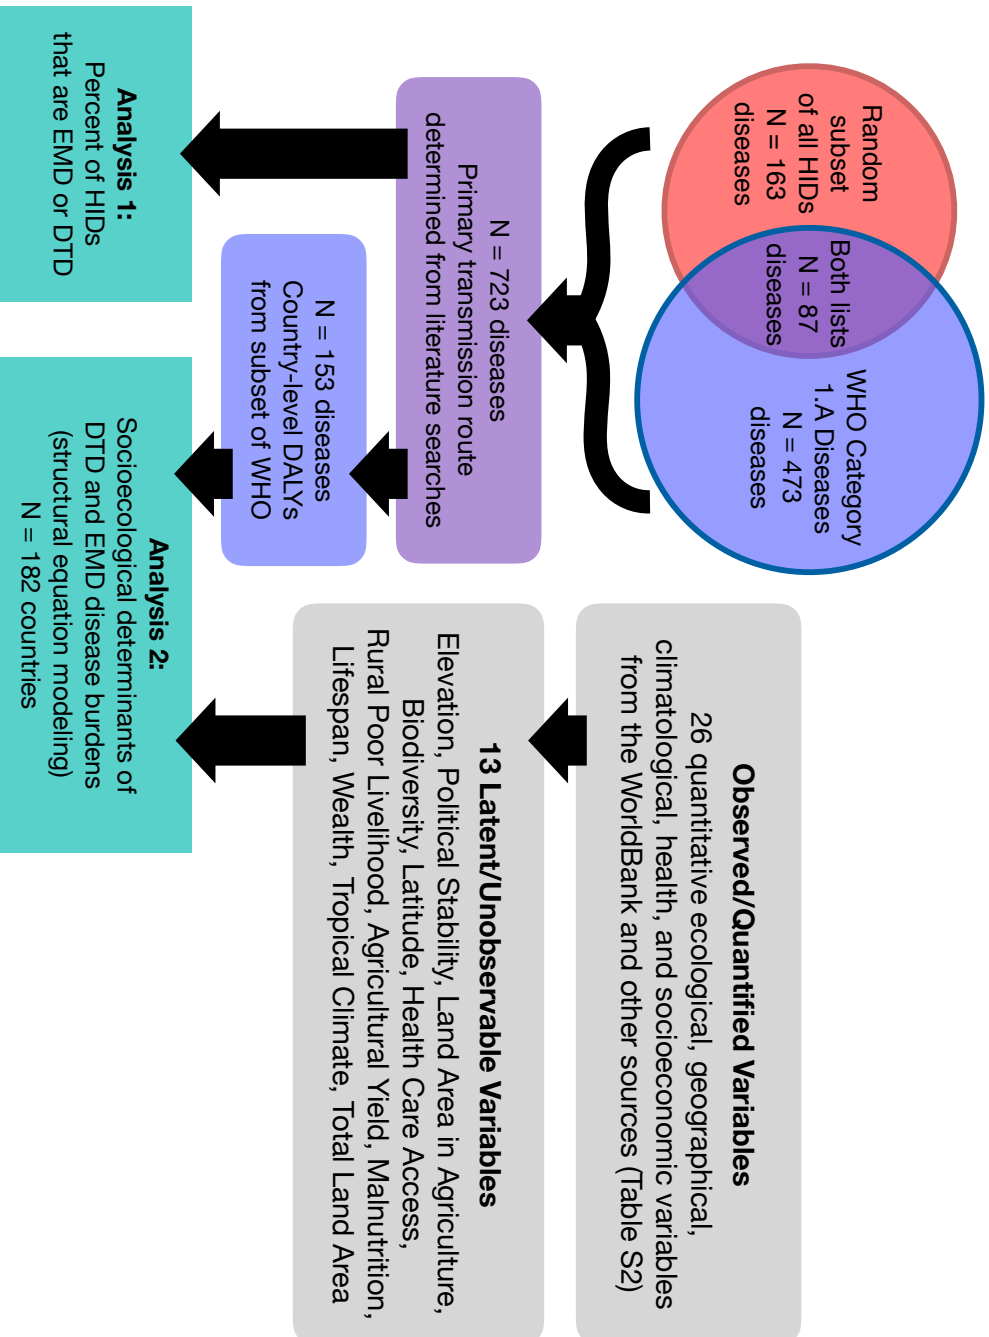

Supplemental Table. Pathogens assessed.

| Genus               | Pathogen                                    | Primary transmission category | Environmentally mediated? | WHO list? | Taylor list? | Refs  |
|---------------------|---------------------------------------------|-------------------------------|---------------------------|-----------|--------------|-------|
| Abiotrophia         | <i>Abiotrophia defectiva</i>                | opportunistic/normal flora    | no                        | no        | yes          | 1,2   |
| Absidia             | <i>Absidia corymbifera</i>                  | sapronosis                    | yes                       | yes       | yes          | 3     |
| Acanthamoeba        | <i>A astronyxis</i>                         | sapronosis                    | yes                       | yes       | no           | 4,5   |
| Acanthamoeba        | <i>A castellanii</i>                        | sapronosis                    | yes                       | yes       | no           | 4,5   |
| Acanthamoeba        | <i>A culbertsoni</i>                        | sapronosis                    | yes                       | yes       | no           | 4,5   |
| Acanthamoeba        | <i>A hatchetti</i>                          | sapronosis                    | yes                       | yes       | yes          | 4,5   |
| Acanthamoeba        | <i>A palistinensis</i>                      | sapronosis                    | yes                       | yes       | no           | 4,5   |
| Acanthamoeba        | <i>A rhysoides</i>                          | sapronosis                    | yes                       | yes       | no           | 4,5   |
| Acanthamoeba        | <i>Acanthamoeba polyphaga</i>               | sapronosis                    | yes                       | yes       | yes          | 5,6   |
| Acanthocephalus     | <i>Acanthocephalus bufonis</i>              | foodborne                     | yes                       | yes       | no           | 7     |
| Acanthocephalus     | <i>Acanthocephalus other</i>                | foodborne                     | yes                       | yes       | no           | 7     |
| Acanthocephalus     | <i>Acanthocephalus rauschi</i>              | foodborne                     | yes                       | yes       | no           | 7     |
| Achromobacter       | <i>Achromobacter piechaudii</i>             | unknown/unclassifiable        | unknown                   | no        | yes          | 8     |
| Acinetobacter       | <i>Acinetobacter johnsonii</i>              | nosocomial                    | yes                       | no        | yes          | 9     |
| Acinetobacter       | <i>Acinetobacter junii</i>                  | unknown/unclassifiable        | unknown                   | no        | yes          | 10    |
| Acinetobacter       | <i>Acinetobacter lwoffii</i>                | human-to-human                | no                        | no        | yes          | 11    |
| Acremonium          | <i>Acremonium curvulum</i>                  | sapronosis                    | yes                       | no        | yes          | 12,13 |
| Acremonium          | <i>Acremonium strictum</i>                  | sapronosis                    | yes                       | no        | yes          | 14,15 |
| Actinobacillus      | <i>Actinobacillus equuli</i>                | human-to-human                | no                        | no        | yes          | 16,17 |
| Actinomadura        | <i>A latina</i>                             | sapronosis                    | yes                       | yes       | no           | 18    |
| Actinomadura        | <i>Actinomadura madurae</i>                 | sapronosis                    | yes                       | yes       | no           | 18    |
| Actinomadura        | <i>Actinomadura pelletieri</i>              | sapronosis                    | yes                       | yes       | no           | 18    |
| Actinomyces         | <i>Actinomyces israelii</i>                 | opportunistic/normal flora    | no                        | yes       | no           | 19    |
| Actinomyces         | <i>Actinomyces meyeri</i>                   | opportunistic/normal flora    | no                        | no        | yes          | 20,21 |
| Alaria              | <i>Alaria marcianae</i>                     | foodborne                     | yes                       | no        | yes          | 22    |
| Alphacoronavirus    | <i>Human coronavirus 229E</i>               | human-to-human                | no                        | yes       | yes          | 23    |
| Alphacoronavirus    | <i>Human coronavirus NL63</i>               | human-to-human                | no                        | yes       | no           | 23    |
| Alphainfluenzavirus | <i>Influenza A virus</i>                    | human-to-human                | no                        | no        | yes          | 24    |
| Alphavirus          | <i>Chikungunya virus</i>                    | vectorborne                   | yes                       | yes       | yes          | 25    |
| Alphavirus          | <i>Eastern equine encephalitis virus</i>    | vectorborne                   | yes                       | yes       | no           | 26,27 |
| Alphavirus          | <i>Everglades virus</i>                     | vectorborne                   | yes                       | no        | yes          | 28    |
| Alphavirus          | <i>O'nyong-nyong virus</i>                  | vectorborne                   | yes                       | yes       | no           | 29    |
| Alphavirus          | <i>Ockelbo virus</i>                        | vectorborne                   | yes                       | no        | yes          | 30    |
| Alphavirus          | <i>Ross River virus</i>                     | vectorborne                   | yes                       | yes       | no           | 31    |
| Alphavirus          | <i>Venezuelan equine encephalitis virus</i> | vectorborne                   | yes                       | yes       | no           | 32    |
| Alphavirus          | <i>Western equine encephalitis virus</i>    | vectorborne                   | yes                       | yes       | no           | 27,33 |
| Alternaria          | <i>Alternaria tenuissima</i>                | sapronosis                    | yes                       | no        | yes          | 34,35 |
| Ancylostoma         | <i>Ancylostoma braziliense</i>              | soilborne                     | yes                       | yes       | no           | 36    |
| Ancylostoma         | <i>Ancylostoma Caninum</i>                  | soilborne                     | yes                       | yes       | yes          | 37    |
| Ancylostoma         | <i>Ancylostoma ceylanicum</i>               | soilborne                     | yes                       | yes       | no           | 38    |
| Ancylostoma         | <i>Ancylostoma duodenale</i>                | soilborne                     | yes                       | yes       | no           | 39,40 |
| Ancylostoma         | <i>Ancylostoma malayanum</i>                | soilborne                     | yes                       | yes       | no           | 7     |
| Angiostrongylus     | <i>Angiostrongylus cantonensis</i>          | foodborne                     | yes                       | yes       | no           | 41,42 |
| Anisakis            | <i>A simplex</i>                            | foodborne                     | yes                       | yes       | no           | 7     |
| Anisakis            | <i>Anisakis physeteris</i>                  | foodborne                     | yes                       | yes       | no           | 7     |
| Aphanoascus         | <i>Aphanoascus fulvescens</i>               | sapronosis                    | yes                       | no        | yes          | 43,44 |
| Apophysomyces       | <i>Apophysomyces elegans</i>                | sapronosis                    | yes                       | yes       | no           | 45    |
| Arcanobacterium     | <i>Arcanobacterium pyogenes</i>             | directly zoonotic (domestic)  | yes                       | no        | yes          | 46,47 |
| Arenavirus          | <i>Junin virus</i>                          | directly zoonotic (wildlife)  | yes                       | yes       | no           | 48,49 |
| Arenavirus          | <i>Lassa virus</i>                          | human-to-human                | no                        | yes       | no           | 50    |
| Arenavirus          | <i>Machupo virus</i>                        | unknown/unclassifiable        | yes                       | yes       | no           | 51    |
| Artyfechinostomum   | <i>Artyfechinostomum mehrai</i>             | foodborne                     | yes                       | no        | yes          | 52    |
| Ascaris             | <i>Ascaris lumbricoides</i>                 | soilborne                     | yes                       | yes       | no           | 53-55 |
| Aspergillus         | <i>A candidus</i>                           | sapronosis                    | yes                       | yes       | no           | 56    |
| Aspergillus         | <i>A fisherianus</i>                        | sapronosis                    | yes                       | yes       | no           | 57    |
| Aspergillus         | <i>A flavipes</i>                           | sapronosis                    | yes                       | yes       | no           | 58    |
| Aspergillus         | <i>A flavus</i>                             | sapronosis                    | yes                       | yes       | no           | 59    |
| Aspergillus         | <i>A fumigatus group</i>                    | sapronosis                    | yes                       | yes       | no           | 60    |
| Aspergillus         | <i>A glaucus</i>                            | sapronosis                    | yes                       | yes       | no           | 61    |
| Aspergillus         | <i>A nidulans</i>                           | sapronosis                    | yes                       | yes       | no           | 62    |
| Aspergillus         | <i>A niger</i>                              | sapronosis                    | yes                       | yes       | no           | 63    |
| Aspergillus         | <i>A terreus group</i>                      | sapronosis                    | yes                       | yes       | yes          | 64,65 |
| Aspergillus         | <i>A versicolor</i>                         | sapronosis                    | yes                       | yes       | no           | 61    |
| Aspergillus         | <i>A wentii</i>                             | sapronosis                    | yes                       | yes       | no           | 66    |
| Aspergillus         | <i>Aspergillus clavatus</i>                 | sapronosis                    | yes                       | yes       | yes          | 67,68 |
| Australobilharzia   | <i>Australobilharzia terrigalensis</i>      | waterborne                    | yes                       | no        | yes          | 69    |

| Genus           | Pathogen                            | Primary transmission category | Environmentally mediated? | WHO list? | Taylor list? | Refs     |
|-----------------|-------------------------------------|-------------------------------|---------------------------|-----------|--------------|----------|
| Avulavirus      | Newcastle disease virus             | directly zoonotic (domestic)  | yes                       | yes       | no           | 70       |
| Babesia         | <i>B divergens</i>                  | vectorborne                   | yes                       | yes       | no           | 71       |
| Babesia         | <i>B gibsoni</i>                    | vectorborne                   | yes                       | yes       | no           | 71       |
| Babesia         | <i>B microti</i>                    | vectorborne                   | yes                       | yes       | no           | 71       |
| Babesia         | <i>Babesia bovis</i>                | vectorborne                   | yes                       | yes       | yes          | 72       |
| Bacillus        | <i>Bacillus anthracis</i>           | soilborne                     | yes                       | yes       | no           | 73,74    |
| Bacillus        | <i>Bacillus cereus</i>              | sapronosis                    | yes                       | yes       | no           | 75       |
| Bacillus        | <i>Bacillus coagulans</i>           | sapronosis                    | yes                       | no        | yes          | 76       |
| Bacillus        | <i>Bacillus fusiformis</i>          | unknown/unclassifiable        | unknown                   | yes       | no           | 77       |
| Bacillus        | <i>Bacillus sphaericus</i>          | unknown/unclassifiable        | yes                       | no        | yes          | 78,79    |
| Bacillus        | <i>Bacillus thuringiensis</i>       | unknown/unclassifiable        | yes                       | no        | yes          | 80       |
| Bacteroides     | <i>Bacteroides fragilis</i>         | opportunistic/normal flora    | no                        | yes       | no           | 81       |
| Bacteroides     | <i>Bacteroides thetaiotaomicron</i> | opportunistic/normal flora    | no                        | no        | yes          | 82,83    |
| Bacteroides     | <i>Bacteroides vulgata</i>          | opportunistic/normal flora    | no                        | no        | yes          | 84       |
| Balantidium     | <i>Balantidium coli</i>             | waterborne                    | yes                       | yes       | no           | 85,86    |
| Bartonella      | <i>Bartonella bacilliformis</i>     | vectorborne                   | yes                       | yes       | no           | 87,88    |
| Bartonella      | <i>Bartonella henselae</i>          | vectorborne                   | yes                       | yes       | no           | 89       |
| Bartonella      | <i>Bartonella quintana</i>          | vectorborne                   | yes                       | yes       | no           | 87,90,91 |
| Basidiobolus    | <i>Basidiobolus ranarum</i>         | sapronosis                    | yes                       | yes       | no           | 92       |
| Baylisascaris   | <i>Baylisascaris procyonis</i>      | directly zoonotic (wildlife)  | yes                       | yes       | no           | 93       |
| Beauveria       | <i>Beauveria bassiana</i>           | sapronosis                    | yes                       | no        | yes          | 94       |
| Betacoronavirus | <i>Human coronavirus HKU1</i>       | human-to-human                | no                        | yes       | no           | 23,95    |
| Betacoronavirus | <i>Human coronavirus OC43</i>       | human-to-human                | no                        | yes       | no           | 23,95    |
| Bipolaris       | <i>Bipolaris australiensis</i>      | sapronosis                    | yes                       | no        | yes          | 96,97    |
| Bipolaris       | <i>Bipolaris hawaiiensis</i>        | sapronosis                    | yes                       | no        | yes          | 98       |
| Bipolaris       | <i>Bipolaris spicifera</i>          | sapronosis                    | yes                       | no        | yes          | 98       |
| Blastomyces     | <i>Blastomyces dermatitidis</i>     | sapronosis                    | yes                       | yes       | no           | 99,100   |
| Bordetella      | <i>Bordetella bronchiseptica</i>    | directly zoonotic (domestic)  | yes                       | no        | yes          | 101-103  |
| Bordetella      | <i>Bordetella parapertussis</i>     | human-to-human                | no                        | yes       | no           | 104-106  |
| Bordetella      | <i>Bordetella pertussis</i>         | human-to-human                | no                        | yes       | yes          | 107,108  |
| Bornavirus      | <i>Borna disease virus</i>          | unknown/unclassifiable        | unknown                   | no        | yes          | 109,110  |
| Borrelia        | <i>Borrelia burgdorferi</i>         | vectorborne                   | yes                       | yes       | no           | 111,112  |
| Borrelia        | <i>Borrelia hermsii</i>             | vectorborne                   | yes                       | yes       | yes          | 113      |
| Borrelia        | <i>Borrelia latyschewii</i>         | vectorborne                   | yes                       | no        | yes          | 114      |
| Borrelia        | <i>Borrelia mazzottii</i>           | vectorborne                   | yes                       | no        | yes          | 115      |
| Borrelia        | <i>Borrelia recurrentis</i>         | vectorborne                   | yes                       | yes       | no           | 116      |
| Borrelia        | <i>Borrelia vincentii</i>           | opportunistic/normal flora    | no                        | yes       | no           | 117      |
| Borrelia        | <i>Borrelia caucasica</i>           | vectorborne                   | yes                       | no        | yes          | 118      |
| Botryomyces     | <i>Botryomyces caespitosus</i>      | unknown/unclassifiable        | unknown                   | no        | yes          | 119      |
| Brucella        | <i>Brucella melitensis</i>          | foodborne                     | yes                       | yes       | yes          | 120,121  |
| Brugia          | <i>Brugia guyanensis</i>            | vectorborne                   | yes                       | no        | yes          | 22       |
| Brugia          | <i>Brugia malayi</i>                | vectorborne                   | yes                       | yes       | no           | 122,123  |
| Brugia          | <i>Brugia timori</i>                | vectorborne                   | yes                       | yes       | no           | 122,123  |
| Bunostomum      | <i>Bunostomum phlebotomum</i>       | soilborne                     | yes                       | no        | yes          | 124,125  |
| Bunyamwera      | <i>Bunyamwera virus</i>             | vectorborne                   | yes                       | no        | yes          | 126      |
| Burkholderia    | <i>Burkholderia mallei</i>          | directly zoonotic (domestic)  | yes                       | yes       | no           | 127,128  |
| Burkholderia    | <i>Burkholderia pseudomallei</i>    | sapronosis                    | yes                       | yes       | no           | 127,128  |
| Calicivirus     | <i>Norwalk agent</i>                | foodborne/waterborne          | yes                       | yes       | no           | 129,130  |
| Campylobacter   | <i>C concisus</i>                   | sapronosis                    | yes                       | yes       | no           | 131,132  |
| Campylobacter   | <i>C curvus</i>                     | sapronosis                    | yes                       | yes       | no           | 131,132  |
| Campylobacter   | <i>C fetus</i>                      | sapronosis                    | yes                       | yes       | no           | 131,132  |
| Campylobacter   | <i>C gracilis</i>                   | sapronosis                    | yes                       | yes       | no           | 131,132  |
| Campylobacter   | <i>C hyointestinalis</i>            | sapronosis                    | yes                       | yes       | no           | 131,132  |
| Campylobacter   | <i>C jejuni</i>                     | sapronosis                    | yes                       | yes       | no           | 131,132  |
| Campylobacter   | <i>C lari</i>                       | sapronosis                    | yes                       | yes       | no           | 131,132  |
| Campylobacter   | <i>C rectus</i>                     | sapronosis                    | yes                       | yes       | no           | 131,132  |
| Campylobacter   | <i>C sputorum</i>                   | sapronosis                    | yes                       | yes       | no           | 131,132  |
| Campylobacter   | <i>C upsaliensis</i>                | sapronosis                    | yes                       | yes       | no           | 131,132  |
| Campylobacter   | <i>Campylobacter coli</i>           | sapronosis                    | yes                       | yes       | no           | 131,132  |
| Candida         | <i>C albicans</i>                   | opportunistic/normal flora    | no                        | yes       | no           | 133,134  |
| Candida         | <i>C glabrata</i>                   | opportunistic/normal flora    | no                        | yes       | no           | 133      |
| Candida         | <i>C lusitanae</i>                  | sapronosis                    | yes                       | yes       | yes          | 133      |
| Candida         | <i>C parapsilosis</i>               | sapronosis                    | yes                       | yes       | no           | 133,135  |
| Candida         | <i>C tropicalis</i>                 | opportunistic/normal flora    | no                        | yes       | no           | 133      |
| Candida         | <i>Candida krusei</i>               | sapronosis                    | yes                       | yes       | yes          | 136-138  |
| Capillaria      | <i>Capillaria aerophila</i>         | foodborne                     | yes                       | yes       | no           | 7        |
| Capillaria      | <i>Capillaria hepaticum</i>         | foodborne                     | yes                       | yes       | no           | 7        |
| Capillaria      | <i>Capillaria philippinensis</i>    | foodborne                     | yes                       | yes       | no           | 7        |
| Capnocytophaga  | <i>Capnocytophaga canimorsus</i>    | directly zoonotic (domestic)  | yes                       | no        | yes          | 139,140  |
| Capnocytophaga  | <i>Capnocytophaga ochracea</i>      | opportunistic/normal flora    | no                        | no        | yes          | 141      |

| Genus            | Pathogen                                  | Primary transmission category | Environmentally mediated? | WHO list? | Taylor list? | Refs    |
|------------------|-------------------------------------------|-------------------------------|---------------------------|-----------|--------------|---------|
| Cardiobacterium  | <i>Cardiobacterium hominis</i>            | opportunistic/normal flora    | no                        | no        | yes          | 142-144 |
| Centipeda        | <i>Centipeda periodontii</i>              | opportunistic/normal flora    | no                        | no        | yes          | 145,146 |
| Centrocestus     | <i>Centrocestus formosanus</i>            | foodborne                     | yes                       | no        | yes          | 147-149 |
| Chaetomium       | <i>Chaetomium atrobrunneum</i>            | sapronosis                    | yes                       | no        | yes          | 150,151 |
| Chlamydia        | <i>Chlamydia psittaci</i>                 | directly zoonotic (wildlife)  | yes                       | yes       | no           | 152,153 |
| Chlamydia        | <i>Chlamydia trachomatis</i>              | human-to-human                | no                        | yes       | no           | 154     |
| Chlamydoabsidia  | <i>Chlamydoabsidia padenii</i>            | unknown/unclassifiable        | unknown                   | no        | yes          | 155     |
| Chlorella        | <i>Chlorella protothecoides</i>           | sapronosis                    | yes                       | no        | yes          | 156     |
| Chryseobacterium | <i>Chryseobacterium meningosepticum</i>   | nosocomial                    | yes                       | no        | yes          | 157     |
| Citrobacter      | <i>Citrobacter koseri</i>                 | opportunistic/normal flora    | no                        | no        | yes          | 158,159 |
| Citrobacter      | <i>Citrobacter sedakii</i>                | human-to-human                | no                        | no        | yes          | 160     |
| Citrobacter      | <i>Citrobacter werkmanii</i>              | nosocomial                    | yes                       | no        | yes          | 161     |
| Cladorrhinum     | <i>Cladorrhinum bulbosum</i>              | sapronosis                    | yes                       | no        | yes          | 162,163 |
| Cladosporium     | <i>Cladosporium carrionii</i>             | sapronosis                    | yes                       | yes       | no           | 164     |
| Clinostomum      | <i>Clinostomum complanatum</i>            | foodborne                     | yes                       | no        | yes          | 165     |
| Clostridium      | <i>Clostridium bifermentans</i>           | unknown/unclassifiable        | unknown                   | no        | yes          | 166     |
| Clostridium      | <i>Clostridium botulinum</i>              | sapronosis                    | yes                       | yes       | no           | 167     |
| Clostridium      | <i>Clostridium chauvoei</i>               | unknown/unclassifiable        | unknown                   | no        | yes          | 166     |
| Clostridium      | <i>Clostridium difficile</i>              | human-to-human                | unknown                   | yes       | no           | 168,169 |
| Clostridium      | <i>Clostridium novyi</i>                  | opportunistic/normal flora    | yes                       | no        | yes          | 166     |
| Clostridium      | <i>Clostridium perfringens</i>            | sapronosis                    | yes                       | yes       | yes          | 170,171 |
| Clostridium      | <i>Clostridium sordellii</i>              | opportunistic/normal flora    | yes                       | no        | yes          | 166     |
| Clostridium      | <i>Clostridium tetani</i>                 | sapronosis                    | yes                       | yes       | no           | 172,173 |
| Coccidioides     | <i>Coccidioides immitis</i>               | sapronosis                    | yes                       | yes       | no           | 174     |
| Cokeromyces      | <i>Cokeromyces recurvatus</i>             | sapronosis                    | yes                       | yes       | no           | 175     |
| Coltivirus       | <i>Colorado tick fever virus</i>          | vectorborne                   | yes                       | yes       | no           | 176     |
| Coltivirus       | <i>Eyach virus</i>                        | vectorborne                   | yes                       | no        | yes          | 177     |
| Conidiobolus     | <i>C incongruus</i>                       | sapronosis                    | yes                       | yes       | no           | 178     |
| Conidiobolus     | <i>C lamprauges</i>                       | sapronosis                    | yes                       | yes       | no           | 179     |
| Conidiobolus     | <i>Conidiobolus coronatus</i>             | sapronosis                    | yes                       | yes       | no           | 180,181 |
| Corynebacterium  | <i>Corynebacterium diphtheriae</i>        | human-to-human                | no                        | yes       | no           | 182     |
| Corynebacterium  | <i>Corynebacterium minutissimum</i>       | unknown/unclassifiable        | no                        | no        | yes          | 183     |
| Corynebacterium  | <i>Corynebacterium pseudodiphthericum</i> | unknown/unclassifiable        | no                        | no        | yes          | 184-186 |
| Corynebacterium  | <i>Corynebacterium striatum</i>           | opportunistic/normal flora    | no                        | no        | yes          | 187,188 |
| Corynosoma       | <i>Corynosoma strumosum</i>               | foodborne                     | yes                       | no        | yes          | 189     |
| Coxiella         | <i>Coxiella burnetii</i>                  | vectorborne                   | yes                       | yes       | no           | 190,191 |
| Cryptococcus     | <i>Cryptococcus neoformans</i>            | sapronosis                    | yes                       | yes       | no           | 192     |
| Cryptosporidium  | <i>Cryptosporidium canis</i>              | waterborne                    | yes                       | yes       | no           | 193-195 |
| Cryptosporidium  | <i>Cryptosporidium felis</i>              | waterborne                    | yes                       | yes       | no           | 193-195 |
| Cryptosporidium  | <i>Cryptosporidium hominis</i>            | waterborne                    | yes                       | yes       | no           | 193-195 |
| Cryptosporidium  | <i>Cryptosporidium meleagridis</i>        | waterborne                    | yes                       | yes       | no           | 193-195 |
| Cryptosporidium  | <i>Cryptosporidium parvum</i>             | waterborne                    | yes                       | yes       | no           | 193-195 |
| Cunninghamella   | <i>Cunninghamella bertholletiae</i>       | sapronosis                    | yes                       | yes       | no           | 196     |
| Curvularia       | <i>Curvularia geniculata</i>              | sapronosis                    | yes                       | yes       | yes          | 197     |
| Curvularia       | <i>Curvularia lunata</i>                  | sapronosis                    | yes                       | yes       | no           | 198     |
| Cyclodontostomum | <i>Cyclodontostomum purvisi</i>           | foodborne                     | yes                       | no        | yes          | 199-201 |
| Cyclospora       | <i>Cyclospora cayetanensis</i>            | foodborne                     | yes                       | no        | yes          | 202     |
| Cylindrocarpon   | <i>Cylindrocarpon destructans</i>         | sapronosis                    | yes                       | yes       | no           | 203     |
| Cylindrocarpon   | <i>Cylindrocarpon cyanescens</i>          | sapronosis                    | yes                       | yes       | no           | 203     |
| Cytomegalovirus  | <i>Human herpesvirus 5</i>                | human-to-human                | no                        | yes       | no           | 204     |
| Delftia          | <i>Delftia acidovorans</i>                | sapronosis                    | yes                       | no        | yes          | 205,206 |
| Deltaretrovirus  | <i>Human T-Lymphotropic virus 1</i>       | human-to-human                | no                        | yes       | no           | 207     |
| Dicrocoelium     | <i>Dicrocoelium dendriticum</i>           | foodborne/waterborne          | yes                       | yes       | no           | 208,209 |
| Diphyllobothrium | <i>D cameroni</i>                         | foodborne                     | yes                       | yes       | no           | ?       |
| Diphyllobothrium | <i>D cordatum</i>                         | foodborne                     | yes                       | yes       | no           | ?       |
| Diphyllobothrium | <i>D dalliae</i>                          | foodborne                     | yes                       | yes       | no           | ?       |
| Diphyllobothrium | <i>D dendriticum</i>                      | foodborne                     | yes                       | yes       | no           | ?       |
| Diphyllobothrium | <i>D elegans</i>                          | foodborne                     | yes                       | yes       | no           | ?       |
| Diphyllobothrium | <i>D erinaceieuropaei</i>                 | foodborne                     | yes                       | yes       | no           | ?       |
| Diphyllobothrium | <i>D hians</i>                            | foodborne                     | yes                       | yes       | no           | ?       |
| Diphyllobothrium | <i>D houghtoni</i>                        | foodborne                     | yes                       | yes       | no           | ?       |
| Diphyllobothrium | <i>D klebanovskii</i>                     | foodborne                     | yes                       | yes       | no           | ?       |
| Diphyllobothrium | <i>D lanceolatum</i>                      | foodborne                     | yes                       | yes       | no           | ?       |
| Diphyllobothrium | <i>D mansonioides</i>                     | foodborne                     | yes                       | yes       | no           | ?       |
| Diphyllobothrium | <i>D nihonkaiense</i>                     | foodborne                     | yes                       | yes       | no           | ?       |
| Diphyllobothrium | <i>D orcinii</i>                          | foodborne                     | yes                       | yes       | no           | ?       |
| Diphyllobothrium | <i>D pacificum</i>                        | foodborne                     | yes                       | yes       | no           | 210     |
| Diphyllobothrium | <i>D scoticum</i>                         | foodborne                     | yes                       | yes       | no           | ?       |
| Diphyllobothrium | <i>D stemmacephalum</i>                   | foodborne                     | yes                       | yes       | no           | ?       |
| Diphyllobothrium | <i>D theileri</i>                         | foodborne                     | yes                       | yes       | no           | ?       |

| Genus            | Pathogen                                        | Primary transmission category | Environmentally mediated? | WHO list? | Taylor list? | Refs      |
|------------------|-------------------------------------------------|-------------------------------|---------------------------|-----------|--------------|-----------|
| Diphyllobothrium | <i>Diphyllobothrium latum</i>                   | foodborne                     | yes                       | yes       | no           | 210       |
| Dipylidium       | <i>Dipylidium caninum</i>                       | foodborne                     | yes                       | yes       | no           | 7         |
| Dirofilaria      | <i>D immitis</i>                                | vectorborne                   | yes                       | yes       | no           | 7         |
| Dirofilaria      | <i>D repens</i>                                 | vectorborne                   | yes                       | yes       | no           | 7         |
| Dirofilaria      | <i>D striata</i>                                | vectorborne                   | yes                       | yes       | no           | 7         |
| Dirofilaria      | <i>D subdermata</i>                             | vectorborne                   | yes                       | yes       | yes          | 211,212   |
| Dirofilaria      | <i>D ursi</i>                                   | vectorborne                   | yes                       | yes       | no           | 7         |
| Dirofilaria      | <i>Dirofilaria tenuis</i>                       | vectorborne                   | yes                       | yes       | yes          | 213       |
| Doratomyces      | <i>Doratomyces stemonitis</i>                   | unknown/unclassifiable        | yes                       | no        | yes          | 214,215   |
| Dracunculus      | <i>Dracunculus insignis</i>                     | waterborne                    | yes                       | yes       | no           | 7         |
| Dracunculus      | <i>Dracunculus medinensis</i>                   | waterborne                    | yes                       | yes       | no           | 7         |
| Drepanidotaenia  | <i>Drepanidotaenia lanceolata</i>               | foodborne/waterborne          | yes                       | no        | yes          | 216       |
| Ebolavirus       | <i>Cote d'Ivoire ebolavirus</i>                 | human-to-human                | no                        | yes       | no           | 217       |
| Ebolavirus       | <i>Reston ebolavirus</i>                        | human-to-human                | no                        | yes       | no           | 218       |
| Ebolavirus       | <i>Sudan ebolavirus</i>                         | human-to-human                | no                        | yes       | yes          | 217       |
| Ebolavirus       | <i>Zaire ebolavirus</i>                         | human-to-human                | no                        | yes       | no           | 217       |
| Echinococcus     | <i>Echinococcus granulosus</i>                  | foodborne                     | yes                       | yes       | no           | 7         |
| Echinococcus     | <i>Echinococcus multilocularis</i>              | foodborne                     | yes                       | yes       | no           | 7         |
| Echinococcus     | <i>Echinococcus oligarthus</i>                  | foodborne                     | yes                       | yes       | no           | 7         |
| Echinococcus     | <i>Echinococcus vogeli</i>                      | foodborne                     | yes                       | yes       | no           | 7         |
| Echinoparyphium  | <i>Echinoparyphium recurvatum</i>               | foodborne                     | yes                       | no        | yes          | 219       |
| Echinostoma      | <i>E cinetorchis</i>                            | foodborne                     | yes                       | yes       | no           | 220       |
| Echinostoma      | <i>E echinatum</i>                              | foodborne                     | yes                       | yes       | no           | 221       |
| Echinostoma      | <i>E hortense</i>                               | foodborne                     | yes                       | yes       | no           | 222       |
| Echinostoma      | <i>E jassyense</i>                              | foodborne                     | yes                       | yes       | yes          | 149       |
| Echinostoma      | <i>E macrorchis</i>                             | foodborne                     | yes                       | yes       | no           | 223       |
| Echinostoma      | <i>E malayanum</i>                              | foodborne                     | yes                       | yes       | no           | 224       |
| Echinostoma      | <i>E revolutum</i>                              | foodborne                     | yes                       | yes       | no           | 225       |
| Echinostoma      | <i>Echinostoma ilocanum</i>                     | foodborne                     | yes                       | yes       | yes          | 226       |
| Ehrlichia        | <i>Ehrlichia chaffeensis</i>                    | vectorborne                   | yes                       | no        | yes          | 227       |
| Ehrlichia        | <i>Ehrlichia equi</i>                           | vectorborne                   | yes                       | no        | yes          | 228       |
| Ehrlichia        | <i>Ehrlichia sennetsu</i>                       | foodborne                     | yes                       | yes       | no           | 229       |
| Emmonsia         | <i>E crescens</i>                               | sapronosis                    | yes                       | yes       | no           | 230       |
| Emmonsia         | <i>Emmonsia parva</i>                           | sapronosis                    | yes                       | yes       | yes          | 231       |
| Encephalitozoon  | <i>E cuniculi</i>                               | sapronosis                    | yes                       | yes       | no           | 232-234   |
| Encephalitozoon  | <i>E intestinalis</i>                           | sapronosis                    | yes                       | yes       | no           | 232,233   |
| Encephalitozoon  | <i>Encephalitozoon hellem</i>                   | sapronosis                    | yes                       | yes       | no           | 7,232,233 |
| Entamoeba        | <i>Entamoeba histolytica</i>                    | sapronosis                    | yes                       | yes       | no           | 235       |
| Enterobacter     | <i>Enterobacter amnigenus</i>                   | unknown/unclassifiable        | yes                       | no        | yes          | 236       |
| Enterobacter     | <i>Enterobacter cloacae</i>                     | sapronosis                    | yes                       | no        | yes          | 237       |
| Enterobius       | <i>E gregorii</i>                               | human-to-human                | no                        | yes       | no           | 7         |
| Enterobius       | <i>Enterobius vermicularis</i>                  | human-to-human                | no                        | yes       | no           | 7,238     |
| Enterococcus     | <i>Enterococcus durans</i>                      | unknown/unclassifiable        | yes                       | no        | yes          | 239       |
| Enterococcus     | <i>Enterococcus faecium</i>                     | unknown/unclassifiable        | yes                       | no        | yes          | 239-241   |
| Enterococcus     | <i>Enterococcus avium</i>                       | opportunistic/normal flora    | no                        | no        | yes          | 239       |
| Enterocytozoon   | <i>Enterocytozoon bienersi</i>                  | unknown/unclassifiable        | yes                       | yes       | yes          | 242       |
| Enterovirus      | <i>Echovirus</i>                                | foodborne/waterborne          | yes                       | yes       | no           | 243,244   |
| Enterovirus      | <i>Echovirus type 16</i>                        | human-to-human                | no                        | yes       | no           | 245       |
| Enterovirus      | <i>Human enterovirus 70</i>                     | human-to-human                | no                        | yes       | no           | 246       |
| Enterovirus      | <i>Human enterovirus A</i>                      | human-to-human                | no                        | yes       | no           | 246       |
| Enterovirus      | <i>Human enterovirus B</i>                      | human-to-human                | no                        | yes       | no           | 246,247   |
| Enterovirus      | <i>Poliovirus</i>                               | human-to-human                | no                        | yes       | no           | 248       |
| Epidermophyton   | <i>Epidermophyton floccosum</i>                 | human-to-human                | no                        | yes       | no           | 249       |
| Erysipelothrix   | <i>Erysipelothrix rhusiopathiae</i>             | sapronosis                    | yes                       | yes       | no           | 250,251   |
| Escherichia      | <i>Escherichia coli</i>                         | sapronosis                    | yes                       | yes       | no           | 252,253   |
| Eubacterium      | <i>Eubacterium brachy</i>                       | opportunistic/normal flora    | no                        | no        | yes          | 254,255   |
| Eubacterium      | <i>Eubacterium combesii</i>                     | opportunistic/normal flora    | no                        | no        | yes          | 256       |
| Eubacterium      | <i>Eubacterium contortum</i>                    | opportunistic/normal flora    | no                        | no        | yes          | 257       |
| Exophiala        | <i>E oligosperma</i>                            | sapronosis                    | yes                       | yes       | no           | 258,259   |
| Exophiala        | <i>Exophiala jeanselmei</i>                     | sapronosis                    | yes                       | yes       | no           | 260,261   |
| Fasciola         | <i>F hepatica</i>                               | foodborne                     | yes                       | yes       | no           | 262       |
| Fasciola         | <i>F indica</i>                                 | foodborne                     | yes                       | yes       | no           | 262       |
| Fasciola         | <i>Fasciola gigantica</i>                       | foodborne                     | yes                       | yes       | no           | 262       |
| Fasciolopsis     | <i>Fasciolopsis buski</i>                       | foodborne                     | yes                       | yes       | no           | 263       |
| Fibrobacter      | <i>Fibrobacter intestinalis</i>                 | opportunistic/normal flora    | no                        | no        | yes          | 264       |
| Flavivirus       | <i>Central European encephalitis virus</i>      | vectorborne                   | yes                       | yes       | no           | 265       |
| Flavivirus       | <i>Dengue virus</i>                             | vectorborne                   | yes                       | yes       | yes          | 266,267   |
| Flavivirus       | <i>Far eastern tickborne encephalitis virus</i> | vectorborne                   | yes                       | yes       | yes          | 268       |
| Flavivirus       | <i>Japanese encephalitis virus</i>              | vectorborne                   | yes                       | yes       | no           | 269       |
| Flavivirus       | <i>Kunjin virus</i>                             | vectorborne                   | yes                       | yes       | no           | 270       |

| Genus           | Pathogen                                                  | Primary transmission category | Environmentally mediated? | WHO list? | Taylor list? | Refs     |
|-----------------|-----------------------------------------------------------|-------------------------------|---------------------------|-----------|--------------|----------|
| Flavivirus      | <i>Kyasanur forest disease virus</i>                      | vectorborne                   | yes                       | yes       | yes          | 271      |
| Flavivirus      | <i>Louping ill virus</i>                                  | vectorborne                   | yes                       | yes       | no           | 272,273  |
| Flavivirus      | <i>Murray Valley virus</i>                                | vectorborne                   | yes                       | yes       | no           | 274      |
| Flavivirus      | <i>Omsk haemorrhagic fever virus</i>                      | vectorborne                   | yes                       | yes       | no           | 275      |
| Flavivirus      | <i>Powassan virus</i>                                     | vectorborne                   | yes                       | yes       | no           | 276      |
| Flavivirus      | <i>Rocio virus</i>                                        | vectorborne                   | yes                       | yes       | no           | 277      |
| Flavivirus      | <i>St Louis encephalitis virus</i>                        | vectorborne                   | yes                       | yes       | no           | 278      |
| Flavivirus      | <i>West Nile virus</i>                                    | vectorborne                   | yes                       | yes       | no           | 279      |
| Flavivirus      | <i>Yellow fever virus</i>                                 | vectorborne                   | yes                       | yes       | no           | 280      |
| Fluoribacter    | <i>Fluoribacter bozemaniae</i> ( <i>Legionella</i> )      | sapronosis                    | yes                       | no        | yes          | 281      |
| Fluoribacter    | <i>Fluoribacter dumoffi</i> ( <i>Legionella dumoffi</i> ) | sapronosis                    | yes                       | no        | yes          | 282      |
| Fonsecaea       | <i>Fonsecaea compacta</i> (aka <i>Rhinocladia</i> )       | sapronosis                    | yes                       | yes       | no           | 283      |
| Fonsecaea       | <i>Fonsecaea pedrosoi</i>                                 | sapronosis                    | yes                       | yes       | no           | 284      |
| Francisella     | <i>Francisella tularensis</i>                             | vectorborne                   | yes                       | yes       | yes          | 285–287  |
| Fusarium        | <i>Fusarium solani</i>                                    | sapronosis                    | yes                       | yes       | no           | 288      |
| Fusarium        | <i>Fusarium verticillioides</i>                           | sapronosis                    | yes                       | yes       | no           | 289      |
| Fusobacterium   | <i>Fusobacterium mortiferum</i>                           | opportunistic/normal flora    | no                        | no        | yes          | 290      |
| Gardnerella     | <i>Gardnerella vaginalis</i>                              | human-to-human                | no                        | no        | yes          | 291      |
| Gastrodiscoides | <i>Gastrodiscoides hominis</i>                            | foodborne                     | yes                       | no        | yes          | 292      |
| Geotrichum      | <i>Geotrichum candidum</i>                                | sapronosis                    | yes                       | yes       | no           | 293,294  |
| Giardia         | <i>Giardia lamblia</i>                                    | waterborne                    | yes                       | yes       | yes          | 295      |
| Gnathostoma     | <i>G. hispidum</i>                                        | foodborne                     | yes                       | yes       | no           | 7        |
| Gnathostoma     | <i>G. nipponicum</i>                                      | foodborne                     | yes                       | yes       | no           | 7        |
| Gnathostoma     | <i>Gnathostoma doloresi</i>                               | foodborne                     | yes                       | yes       | yes          | 296,297  |
| Gnathostoma     | <i>Gnathostoma spinigerum</i>                             | waterborne                    | yes                       | yes       | yes          | 298,299  |
| Gonglyonema     | <i>Gonglyonema pulchrum</i>                               | foodborne/waterborne          | yes                       | yes       | no           | 300      |
| Gordonia        | <i>Gordonia terrae</i>                                    | sapronosis                    | yes                       | no        | yes          | 301      |
| Haemophilus     | <i>Haemophilus aphrophilus</i>                            | opportunistic/normal flora    | no                        | no        | yes          | 302–304  |
| Haemophilus     | <i>Haemophilus ducreyi</i>                                | human-to-human                | no                        | yes       | no           | 305,306  |
| Haemophilus     | <i>Haemophilus influenzae</i>                             | human-to-human                | no                        | yes       | no           | 307      |
| Hantavirus      | <i>Andes virus</i>                                        | directly zoonotic (wildlife)  | yes                       | no        | yes          | 308      |
| Hantavirus      | <i>Dobrava virus</i>                                      | directly zoonotic (wildlife)  | yes                       | yes       | no           | 309      |
| Hantavirus      | <i>Hantaan virus</i>                                      | directly zoonotic (wildlife)  | yes                       | yes       | no           | 38,309,3 |
| Hantavirus      | <i>Puumala virus</i>                                      | directly zoonotic (wildlife)  | yes                       | yes       | no           | 309      |
| Hantavirus      | <i>Seoul virus</i>                                        | directly zoonotic (wildlife)  | yes                       | yes       | no           | 309      |
| Hantavirus      | <i>Sin Nombre virus</i>                                   | directly zoonotic (wildlife)  | yes                       | yes       | no           | 311      |
| Haplorchis      | <i>Haplorchis vanissima</i>                               | foodborne                     | yes                       | no        | yes          | 312      |
| Helicobacter    | <i>Helicobacter pylori</i>                                | human-to-human                | no                        | yes       | no           | 313,314  |
| Hepatovirus     | <i>Hepatitis A virus</i>                                  | human-to-human                | no                        | yes       | no           | 315      |
| Heterophyes     | <i>H. dispar</i>                                          | foodborne                     | yes                       | yes       | no           | 316      |
| Heterophyes     | <i>H. nocens</i>                                          | foodborne                     | yes                       | yes       | no           | 317      |
| Heterophyes     | <i>Heterophyes heterophyes</i>                            | foodborne                     | yes                       | yes       | no           | 316      |
| Heterophyopsis  | <i>Heterophyopsis continua</i>                            | foodborne                     | yes                       | no        | yes          | 318      |
| Histoplasma     | <i>Histoplasma capsulatum</i>                             | sapronosis                    | yes                       | yes       | no           | 319      |
| Hortaea         | <i>Hortaea werneckii</i>                                  | sapronosis                    | yes                       | yes       | no           | 320      |
| Hymenolepis     | <i>Hymenolepis diminuta</i>                               | foodborne                     | yes                       | yes       | no           | 7        |
| Hymenolepis     | <i>Hymenolepis nana</i>                                   | foodborne                     | yes                       | yes       | no           | 7        |
| Isospora        | <i>Isospora belli</i>                                     | foodborne/waterborne          | yes                       | yes       | yes          | 321,322  |
| Isospora        | <i>Isospora hominis</i>                                   | foodborne/waterborne          | yes                       | yes       | no           | 323      |
| Klebsiella      | <i>Klebsiella granulomatis</i>                            | human-to-human                | no                        | yes       | no           | 324,325  |
| Klebsiella      | <i>Klebsiella oxytoca</i>                                 | nosocomial                    | yes                       | no        | yes          | 326      |
| Klebsiella      | <i>Klebsiella pneumoniae</i>                              | sapronosis                    | yes                       | yes       | no           | 327      |
| Lacazia         | <i>Lacazia loboi</i>                                      | sapronosis                    | yes                       | yes       | no           | 328,329  |
| Lechiguanas     | <i>Lechiguanas virus</i>                                  | directly zoonotic (wildlife)  | yes                       | no        | yes          | 330      |
| Legionella      | <i>Legionella cincinnatiensis</i>                         | sapronosis                    | yes                       | no        | yes          | 331      |
| Legionella      | <i>Legionella lansingensis</i>                            | sapronosis                    | yes                       | no        | yes          | 332      |
| Legionella      | <i>Legionella oakridgensis</i>                            | sapronosis                    | yes                       | no        | yes          | 333      |
| Legionella      | <i>Legionella pneumophila</i>                             | sapronosis                    | yes                       | yes       | yes          | 334,335  |
| Leishmania      | <i>Leishmania aethiopia</i>                               | vectorborne                   | yes                       | yes       | yes          | 336      |
| Leishmania      | <i>Leishmania amazonensis</i>                             | vectorborne                   | yes                       | yes       | no           | 336      |
| Leishmania      | <i>Leishmania braziliensis</i>                            | vectorborne                   | yes                       | yes       | no           | 336      |
| Leishmania      | <i>Leishmania donovani</i>                                | vectorborne                   | yes                       | yes       | no           | 336      |
| Leishmania      | <i>Leishmania guyanensis</i>                              | vectorborne                   | yes                       | yes       | no           | 336      |
| Leishmania      | <i>Leishmania infantum</i>                                | vectorborne                   | yes                       | yes       | no           | 336      |
| Leishmania      | <i>Leishmania lainsoni</i>                                | vectorborne                   | yes                       | yes       | yes          | 308      |
| Leishmania      | <i>Leishmania major</i>                                   | vectorborne                   | yes                       | yes       | yes          | 7,337,33 |
| Leishmania      | <i>Leishmania mexicana</i>                                | vectorborne                   | yes                       | yes       | no           | 336      |
| Leishmania      | <i>Leishmania naiffi</i>                                  | vectorborne                   | yes                       | yes       | yes          | 339      |
| Leishmania      | <i>Leishmania panamensis</i>                              | vectorborne                   | yes                       | yes       | no           | 336      |



| Genus             | Pathogen                                  | Primary transmission category | Environmentally mediated? | WHO list? | Taylor list? | Refs      |
|-------------------|-------------------------------------------|-------------------------------|---------------------------|-----------|--------------|-----------|
| Leishmania        | <i>Leishmania peruviana</i>               | vectorborne                   | yes                       | yes       | no           | 336       |
| Leishmania        | <i>Leishmania tropica</i>                 | vectorborne                   | yes                       | yes       | no           | 336       |
| Leishmania        | <i>Leishmania venezuelensis</i>           | vectorborne                   | yes                       | yes       | yes          | 340-342   |
| Lentivirus        | <i>Human immunodeficiency virus 1</i>     | human-to-human                | no                        | yes       | no           | 343       |
| Lentivirus        | <i>Human immunodeficiency virus 2</i>     | human-to-human                | no                        | yes       | no           | 343       |
| Leptosphaeria     | <i>Leptosphaeria senegalensis</i>         | sapronosis                    | yes                       | no        | yes          | 344       |
| Leptosphaeria     | <i>Leptosphaeria senegalensis</i>         | sapronosis                    | yes                       | yes       | no           | 345       |
| Leptosphaeria     | <i>Leptosphaeria tompkinsii</i>           | sapronosis                    | yes                       | yes       | no           | 345       |
| Leptospira        | <i>L inadai</i>                           | waterborne                    | yes                       | yes       | no           | 346       |
| Leptospira        | <i>L kirschneri</i>                       | waterborne                    | yes                       | yes       | no           | 346,347,3 |
| Leptospira        | <i>L meyeri</i>                           | waterborne                    | yes                       | yes       | no           | 346       |
| Leptospira        | <i>L noguchii</i>                         | waterborne                    | yes                       | yes       | no           | 346       |
| Leptospira        | <i>L peruviana</i>                        | waterborne                    | yes                       | yes       | no           | 346       |
| Leptospira        | <i>L weilii</i>                           | waterborne                    | yes                       | yes       | no           | 346       |
| Leptospira        | <i>Leptospira borgpetersenii</i>          | waterborne                    | yes                       | yes       | yes          | 347,348   |
| Leptospira        | <i>Leptospira interrogans</i>             | waterborne                    | yes                       | yes       | yes          | 349-351   |
| Leptospira        | <i>Leptospira santarosai</i>              | waterborne                    | yes                       | yes       | yes          | 352,353   |
| Listeria          | <i>Listeria monocytogenes</i>             | sapronosis                    | yes                       | yes       | no           | 354       |
| Listeria          | <i>Listeria weishimeri</i>                | foodborne                     | yes                       | no        | yes          | 355,356   |
| Loa               | <i>Loa loa</i>                            | vectorborne                   | yes                       | yes       | no           | 7         |
| Lymphocryptovirus | <i>Epstein-Barr virus</i>                 | human-to-human                | no                        | yes       | no           | 357       |
| Lyssavirus        | <i>Mokola virus</i>                       | directly zoonotic (wildlife)  | unknown                   | no        | yes          | 358       |
| Lyssavirus        | <i>Rabies virus</i>                       | directly zoonotic (wildlife)  | yes                       | yes       | no           | 359       |
| Madurella         | <i>M grisea</i>                           | sapronosis                    | yes                       | yes       | no           | 360,361   |
| Madurella         | <i>Madurella mycetomatis</i>              | sapronosis                    | yes                       | yes       | no           | 360,361   |
| Malassezia        | <i>M globosa</i>                          | opportunistic/normal flora    | no                        | yes       | no           | 362       |
| Malassezia        | <i>M obtusa</i>                           | opportunistic/normal flora    | no                        | yes       | no           | 362       |
| Malassezia        | <i>M pachydermatis</i>                    | opportunistic/normal flora    | no                        | yes       | no           | 362       |
| Malassezia        | <i>M restricta</i>                        | opportunistic/normal flora    | no                        | yes       | no           | 362       |
| Malassezia        | <i>M sloofiae</i>                         | opportunistic/normal flora    | no                        | yes       | no           | 362       |
| Malassezia        | <i>M sympodialis</i>                      | opportunistic/normal flora    | no                        | yes       | no           | 362       |
| Malassezia        | <i>Malassezia furfur</i>                  | opportunistic/normal flora    | unknown                   | yes       | yes          | 362-364   |
| Mammarenavirus    | <i>Lymphocytic choriomeningitis virus</i> | directly zoonotic (wildlife)  | yes                       | yes       | no           | 365       |
| Mammomonogamou    | <i>Mammomonogamous laryngeus</i>          | unknown/unclassifiable        | yes                       | yes       | no           | 7         |
| Mammomonogamou    | <i>Mammomonogamous nasicola</i>           | unknown/unclassifiable        | yes                       | yes       | no           | 7         |
| Mansonella        | <i>Mansonella ozzardi</i>                 | vectorborne                   | yes                       | yes       | no           | 7         |
| Mansonella        | <i>Mansonella perstans</i>                | vectorborne                   | yes                       | yes       | no           | 7         |
| Mansonella        | <i>Mansonella rodhaini</i>                | vectorborne                   | yes                       | yes       | no           | 7         |
| Mansonella        | <i>Mansonella semiclarum</i>              | vectorborne                   | yes                       | yes       | no           | 7         |
| Mansonella        | <i>Mansonella streptocerca</i>            | vectorborne                   | yes                       | yes       | no           | 7         |
| Marburgvirus      | <i>Marburg virus</i>                      | directly zoonotic (wildlife)  | yes                       | yes       | no           | 366,367   |
| Mastadenovirus    | <i>Human adenovirus A</i>                 | human-to-human                | no                        | yes       | no           | 368,369   |
| Mastadenovirus    | <i>Human adenovirus B</i>                 | human-to-human                | no                        | yes       | no           | 368,369   |
| Mastadenovirus    | <i>Human adenovirus C</i>                 | human-to-human                | no                        | yes       | no           | 368,369   |
| Mastadenovirus    | <i>Human adenovirus D</i>                 | human-to-human                | no                        | yes       | no           | 368,369   |
| Mastadenovirus    | <i>Human adenovirus E</i>                 | human-to-human                | no                        | yes       | no           | 368,369   |
| Mastadenovirus    | <i>Human adenovirus F</i>                 | human-to-human                | no                        | yes       | no           | 368,369   |
| Mathevoaenia      | <i>Mathevoaenia symmetrica</i>            | unknown/unclassifiable        | yes                       | no        | yes          | 216,370,  |
| Mecistocirrus     | <i>Mecistocirrus digitatus</i>            | foodborne                     | yes                       | no        | yes          | 372,373   |
| Metagonimus       | <i>M minutus</i>                          | foodborne                     | yes                       | yes       | no           | 7         |
| Metagonimus       | <i>Metagonimus yokogawai</i>              | foodborne                     | yes                       | yes       | yes          | 7         |
| Metapneumovirus   | <i>Human metapneumovirus</i>              | human-to-human                | no                        | yes       | no           | 374       |
| Metastrongylus    | <i>Metastrongylus elongatus</i>           | foodborne                     | yes                       | yes       | no           | 7         |
| Metorchis         | <i>Metorchis conjunctus</i>               | foodborne                     | yes                       | no        | yes          | 375       |
| Microascus        | <i>Microascus cinereus</i>                | sapronosis                    | yes                       | no        | yes          | 151,376   |
| Microascus        | <i>Microascus cirrosus</i>                | sapronosis                    | yes                       | no        | yes          | 377       |
| Micronema         | <i>Micronema deletrix</i>                 | sapronosis                    | yes                       | no        | yes          | 378       |
| Microsporium      | <i>M canis</i>                            | sapronosis                    | yes                       | yes       | no           | 249       |
| Microsporium      | <i>M equinum</i>                          | sapronosis                    | yes                       | yes       | no           | 249,379   |
| Microsporium      | <i>M ferrugineum</i>                      | human-to-human                | no                        | yes       | no           | 249       |
| Microsporium      | <i>M fulvum</i>                           | sapronosis                    | yes                       | yes       | no           | 249       |
| Microsporium      | <i>M gallinae</i>                         | sapronosis                    | yes                       | yes       | no           | 249       |
| Microsporium      | <i>M gypseum</i>                          | sapronosis                    | yes                       | yes       | no           | 249       |
| Microsporium      | <i>M nanum</i>                            | sapronosis                    | yes                       | yes       | no           | 249       |
| Microsporium      | <i>M persicolor</i>                       | sapronosis                    | yes                       | yes       | no           | 249,380   |
| Microsporium      | <i>M praecox</i>                          | sapronosis                    | yes                       | yes       | no           | 249       |
| Microsporium      | <i>M racemosum</i>                        | sapronosis                    | yes                       | yes       | no           | 249       |
| Microsporium      | <i>M vanbreuseghemii</i>                  | sapronosis                    | yes                       | yes       | no           | 249       |
| Microsporium      | <i>Microsporium audouinii</i>             | human-to-human                | no                        | yes       | yes          | 381,382   |
| Molluscipoxvirus  | <i>Molluscum contagiosum virus</i>        | human-to-human                | no                        | yes       | yes          | 383       |

| Genus           | Pathogen                                     | Primary transmission category | Environmentally mediated? | WHO list? | Taylor list? | Refs     |
|-----------------|----------------------------------------------|-------------------------------|---------------------------|-----------|--------------|----------|
| Moniezia        | <i>Moniezia expansa</i>                      | foodborne                     | yes                       | no        | yes          | 384      |
| Moniliella      | <i>Moniliella suavelolens</i>                | sapronosis                    | unknown                   | no        | yes          | 385      |
| Moraxella       | <i>Moraxella cuniculi</i>                    | unknown/unclassifiable        | unknown                   | no        | yes          | 386-388  |
| Morbillivirus   | <i>Measles virus</i>                         | human-to-human                | no                        | yes       | yes          | 389      |
| Mucor           | <i>M circinelloides</i>                      | sapronosis                    | yes                       | yes       | no           | 390      |
| Mucor           | <i>M indicus</i>                             | sapronosis                    | yes                       | yes       | no           | 391      |
| Mucor           | <i>M racemosus</i>                           | sapronosis                    | yes                       | yes       | no           |          |
| Mucor           | <i>M ramosissimus</i>                        | sapronosis                    | yes                       | yes       | no           |          |
| Mucor           | <i>Mucor hiemalis</i>                        | sapronosis                    | yes                       | yes       | yes          | 392      |
| Multiceps       | <i>Multiceps brauni</i>                      | foodborne                     | yes                       | no        | yes          | 393      |
| Myceliophthora  | <i>Myceliophthora thermophila</i>            | sapronosis                    | yes                       | no        | yes          | 394      |
| Mycobacterium   | <i>M abscessus</i>                           | sapronosis                    | yes                       | yes       | yes          | 395-397  |
| Mycobacterium   | <i>M asiaticum</i>                           | unknown/unclassifiable        | yes                       | yes       | no           | 398      |
| Mycobacterium   | <i>M celatum</i>                             | sapronosis                    | yes                       | yes       | no           | 399,400  |
| Mycobacterium   | <i>M chelonae</i>                            | waterborne                    | yes                       | yes       | yes          | 401-403  |
| Mycobacterium   | <i>M conspicuum</i>                          | unknown/unclassifiable        | unknown                   | yes       | no           | 404      |
| Mycobacterium   | <i>M fortuitum</i>                           | sapronosis                    | yes                       | yes       | no           | 366      |
| Mycobacterium   | <i>M genavense</i>                           | unknown/unclassifiable        | unknown                   | yes       | no           | 400      |
| Mycobacterium   | <i>M gordonae</i>                            | sapronosis                    | yes                       | yes       | yes          | 405      |
| Mycobacterium   | <i>M haemophilium</i>                        | unknown/unclassifiable        | yes                       | yes       | no           | 400      |
| Mycobacterium   | <i>M intracellulare</i>                      | sapronosis                    | yes                       | yes       | no           | 400      |
| Mycobacterium   | <i>M kansasii</i>                            | sapronosis                    | yes                       | yes       | no           | 400,406  |
| Mycobacterium   | <i>M malmoense</i>                           | sapronosis                    | yes                       | yes       | no           | 400,408  |
| Mycobacterium   | <i>M marinum</i>                             | sapronosis                    | yes                       | yes       | yes          | 405,409  |
| Mycobacterium   | <i>M mucogenicum</i>                         | sapronosis                    | yes                       | yes       | yes          | 405      |
| Mycobacterium   | <i>M peregrinum</i>                          | sapronosis                    | yes                       | yes       | no           | 400,410  |
| Mycobacterium   | <i>M porcinum</i>                            | sapronosis                    | yes                       | yes       | no           | 400,411  |
| Mycobacterium   | <i>M scrofulaceum</i>                        | sapronosis                    | yes                       | yes       | no           | 400      |
| Mycobacterium   | <i>M senegalense</i>                         | sapronosis                    | yes                       | yes       | yes          | 405,412  |
| Mycobacterium   | <i>M shimoidei</i>                           | unknown/unclassifiable        | unknown                   | yes       | yes          | 414,415  |
| Mycobacterium   | <i>M simium</i>                              | directly zoonotic (wildlife)  | yes                       | yes       | no           | 400      |
| Mycobacterium   | <i>M smegmatis</i>                           | sapronosis                    | yes                       | yes       | no           | 400,416  |
| Mycobacterium   | <i>M szulgai</i>                             | unknown/unclassifiable        | yes                       | yes       | yes          | 417      |
| Mycobacterium   | <i>M ulcerans</i>                            | sapronosis                    | yes                       | yes       | no           | 400,418  |
| Mycobacterium   | <i>M xenopi</i>                              | sapronosis                    | yes                       | yes       | no           | 419,420  |
| Mycobacterium   | <i>Mycobacterium avium</i>                   | sapronosis                    | yes                       | yes       | yes          | 421-423  |
| Mycobacterium   | <i>Mycobacterium bovis</i>                   | foodborne                     | yes                       | yes       | no           | 366,424  |
| Mycobacterium   | <i>Mycobacterium leprae</i>                  | human-to-human                | no                        | yes       | no           | 425-427  |
| Mycobacterium   | <i>Mycobacterium tuberculosis</i>            | human-to-human                | no                        | yes       | no           | 428,429  |
| Mycocentrospora | <i>Mycocentrospora acerina</i>               | sapronosis                    | yes                       | no        | yes          | 430      |
| Mycoplasma      | <i>Mycoplasma pneumoniae</i>                 | human-to-human                | no                        | yes       | no           | 431      |
| Naegleria       | <i>Naegleria fowleri</i>                     | sapronosis                    | yes                       | yes       | no           | 432      |
| Nairovirus      | <i>Crimean-Congo hemorrhagic fever virus</i> | vectorborne                   | yes                       | yes       | yes          | 433      |
| Nannizzia       | <i>Nannizzia cajetani</i>                    | sapronosis                    | yes                       | no        | yes          | 434      |
| Nanophyetus     | <i>Nanophyetus salmincola</i>                | foodborne                     | yes                       | yes       | no           | 7        |
| Nattractia      | <i>Nattractia mangiferae</i>                 | sapronosis                    | yes                       | no        | yes          | 435      |
| Necator         | <i>Necator americanus</i>                    | soilborne                     | yes                       | yes       | no           | 53-55    |
| Neisseria       | <i>Neisseria gonorrhoeae</i>                 | human-to-human                | no                        | yes       | no           | 436      |
| Neisseria       | <i>Neisseria meningitidis</i>                | human-to-human                | no                        | yes       | yes          | 437-439  |
| Neisseria       | <i>Neisseria sicca</i>                       | opportunistic/normal flora    | no                        | no        | yes          | 440      |
| Neotestudina    | <i>Neotestudina rosatii</i>                  | sapronosis                    | yes                       | yes       | no           | 441      |
| Nocardia        | <i>Nocardia asteroides</i>                   | sapronosis                    | yes                       | yes       | no           | 129      |
| Nocardia        | <i>Nocardia brasiliensis</i>                 | sapronosis                    | yes                       | yes       | yes          | 442,443  |
| Nocardia        | <i>Nocardia farcinica</i>                    | sapronosis                    | yes                       | yes       | no           | 129,444  |
| Nocardia        | <i>Nocardia nova</i>                         | sapronosis                    | yes                       | yes       | no           | 129      |
| Nocardia        | <i>Nocardia otitidiscaviarum</i>             | sapronosis                    | yes                       | yes       | no           | 129      |
| Nosema          | <i>N africanum</i>                           | sapronosis                    | yes                       | yes       | no           | 7,233,44 |
| Nosema          | <i>N ceylonensis</i>                         | sapronosis                    | yes                       | yes       | no           | 7,233,44 |
| Nosema          | <i>N ocularum</i>                            | sapronosis                    | yes                       | yes       | no           | 7,233,44 |
| Nosema          | <i>Nosema connori</i>                        | unknown/unclassifiable        | yes                       | yes       | no           | 7,233,44 |
| Oesophagostomum | <i>O aculeatum</i>                           | unknown/unclassifiable        | unknown                   | yes       | no           | 7        |
| Oesophagostomum | <i>O bifurcum</i>                            | foodborne                     | yes                       | yes       | no           | 7,446    |
| Oesophagostomum | <i>Oesophagostomum stephanostomum</i>        | foodborne                     | yes                       | yes       | yes          | 447,448  |
| Oidiodendron    | <i>Oidiodendron cerealis</i>                 | sapronosis                    | yes                       | no        | yes          | 449      |
| Onchocerca      | <i>Onchocerca volvulus</i>                   | vectorborne                   | yes                       | yes       | no           | 450      |
| Oncovirus       | <i>Oncovirus</i>                             | human-to-human                | no                        | yes       | no           | 451      |
| Opisthorchis    | <i>O sinensis</i>                            | foodborne                     | yes                       | yes       | no           | 452      |
| Opisthorchis    | <i>O viverrini</i>                           | foodborne                     | yes                       | yes       | no           | 452      |
| Opisthorchis    | <i>Opisthorchis felineus</i>                 | foodborne                     | yes                       | yes       | yes          | 452      |
| Orthobunyavirus | <i>California encephalitis virus</i>         | vectorborne                   | yes                       | yes       | no           | 453      |

| Genus              | Pathogen                                          | Primary transmission category | Environmentally mediated? | WHO list? | Taylor list? | Refs    |
|--------------------|---------------------------------------------------|-------------------------------|---------------------------|-----------|--------------|---------|
| Orthobunyavirus    | <i>Gan gan virus</i>                              | vectorborne                   | yes                       | no        | yes          | 454     |
| Orthobunyavirus    | <i>La Crosse virus</i>                            | vectorborne                   | yes                       | yes       | no           | 455     |
| Orthobunyavirus    | <i>Marituba virus</i>                             | vectorborne                   | yes                       | no        | yes          | 456     |
| Orthobunyavirus    | <i>Oropouche virus</i>                            | vectorborne                   | yes                       | yes       | no           | 457     |
| Orthohantavirus    | <i>New York virus</i>                             | directly zoonotic (wildlife)  | yes                       | no        | yes          | 458     |
| Orthohepadnavirus  | <i>Hepatitis B virus</i>                          | human-to-human                | no                        | yes       | no           | 459     |
| Orthohepadnavirus  | <i>Hepatitis C virus</i>                          | human-to-human                | no                        | yes       | no           | 460     |
| Orthonairovirus    | <i>Tamdy virus</i>                                | vectorborne                   | yes                       | no        | yes          | 461     |
| Orthopneumovirus   | <i>Respiratory syncytial virus</i>                | human-to-human                | no                        | yes       | no           | 462     |
| Orthopoxvirus      | <i>Cowpox virus</i>                               | directly zoonotic (wildlife)  | yes                       | yes       | no           | 463     |
| Orthopoxvirus      | <i>Monkeypox virus</i>                            | directly zoonotic (wildlife)  | yes                       | yes       | no           | 464     |
| Ovadendron         | <i>Ovadendron ochraceum</i>                       | sapronosis                    | yes                       | no        | yes          | 465,466 |
| Paenibacillus      | <i>Paenibacillus alvei</i>                        | sapronosis                    | yes                       | no        | yes          | 251,467 |
| Papillomavirus     | <i>Human papillomavirus</i>                       | human-to-human                | no                        | yes       | no           | 468     |
| Paracoccidioides   | <i>Paracoccidioides brasiliensis</i>              | sapronosis                    | yes                       | yes       | no           | 469     |
| Paragonimus        | <i>P africanus</i>                                | foodborne                     | yes                       | yes       | no           | 470     |
| Paragonimus        | <i>P caliensis</i>                                | foodborne                     | yes                       | yes       | no           | 471     |
| Paragonimus        | <i>P heterotremus</i>                             | foodborne                     | yes                       | yes       | no           | 472     |
| Paragonimus        | <i>P hueit'ungensis</i>                           | foodborne                     | yes                       | yes       | no           | 473     |
| Paragonimus        | <i>P kellicotti</i>                               | foodborne                     | yes                       | yes       | yes          | 474     |
| Paragonimus        | <i>P mexicanus</i>                                | foodborne                     | yes                       | yes       | no           | 475     |
| Paragonimus        | <i>P miyazakii</i>                                | foodborne                     | yes                       | yes       | no           | 476     |
| Paragonimus        | <i>P ohirai</i>                                   | foodborne                     | yes                       | yes       | no           | 477     |
| Paragonimus        | <i>P philippinensis</i>                           | foodborne                     | yes                       | yes       | no           | 478     |
| Paragonimus        | <i>P sadoensis</i>                                | foodborne                     | yes                       | yes       | no           | 479     |
| Paragonimus        | <i>P siamensis</i>                                | foodborne                     | yes                       | yes       | no           | 480     |
| Paragonimus        | <i>P skrjabini</i>                                | foodborne                     | yes                       | yes       | no           | 481     |
| Paragonimus        | <i>P uterobilateralis</i>                         | foodborne                     | yes                       | yes       | no           | 482     |
| Paragonimus        | <i>P westermani</i>                               | foodborne                     | yes                       | yes       | no           | 483     |
| Paragonimus        | <i>P bangkokensis</i>                             | foodborne                     | yes                       | yes       | yes          | 484     |
| Parapoxvirus       | <i>Orf virus</i>                                  | directly zoonotic (domestic)  | yes                       | yes       | no           | 485     |
| Parapoxvirus       | <i>Pseudocowpox virus</i>                         | directly zoonotic (domestic)  | yes                       | yes       | no           | 486,487 |
| Parastrongylus     | <i>Parastrongylus cantonensis</i>                 | foodborne                     | yes                       | yes       | no           | 7       |
| Parastrongylus     | <i>Parastrongylus costaricensis</i>               | foodborne                     | yes                       | yes       | no           | 7       |
| Parvovirus         | <i>Human parvovirus B19</i>                       | human-to-human                | no                        | yes       | no           | 488     |
| Pasteurella        | <i>Pasteurella canis (may be syn P multocida)</i> | directly zoonotic (domestic)  | yes                       | no        | yes          | 489,490 |
| Pasteurella        | <i>Pasteurella dagmatis</i>                       | unknown/unclassifiable        | yes                       | no        | yes          | 491     |
| Pasteurella        | <i>Pasteurella multocida</i>                      | directly zoonotic (domestic)  | no                        | yes       | no           | 489,490 |
| Pearsonema         | <i>Pearsonema plica</i>                           | unknown/unclassifiable        | yes                       | no        | yes          | 492     |
| Pediculus          | <i>Pediculus capitis</i>                          | human-to-human                | no                        | yes       | no           | 7       |
| Pediculus          | <i>Pediculus humanus</i>                          | human-to-human                | no                        | yes       | no           | 7       |
| Pegivirus          | <i>Hepatitis G virus</i>                          | human-to-human                | no                        | no        | yes          | 493     |
| Penicillium        | <i>Penicillium decumbens</i>                      | sapronosis                    | yes                       | no        | yes          | 494     |
| Penicillium        | <i>Penicillium marneffe</i>                       | sapronosis                    | yes                       | yes       | yes          | 494     |
| Phaeoaneliomycetes | <i>Phaeoaneliomycetes elegans</i>                 | sapronosis                    | yes                       | no        | yes          | 495     |
| Phialemonium       | <i>Phialemonium obovatum</i>                      | unknown/unclassifiable        | yes                       | no        | yes          | 496,497 |
| Phialophora        | <i>Phialophora verrucosa</i>                      | sapronosis                    | yes                       | yes       | no           | 498     |
| Phlebovirus        | <i>Rift Valley fever virus</i>                    | vectorborne                   | yes                       | yes       | no           | 499     |
| Phlebovirus        | <i>Sandfly fever virus</i>                        | vectorborne                   | yes                       | yes       | yes          | 500     |
| Phlebovirus        | <i>Zinga virus</i>                                | vectorborne                   | yes                       | yes       | yes          | 501     |
| Phoma              | <i>Phoma cava</i>                                 | sapronosis                    | yes                       | no        | yes          | 502     |
| Phthirus           | <i>Phthirus pubis</i>                             | human-to-human                | no                        | yes       | no           | 7       |
| Piedraia           | <i>Piedraia hortae</i>                            | sapronosis                    | yes                       | yes       | no           | 503     |
| Plagiorchis        | <i>Plagiorchis javensis</i>                       | foodborne                     | yes                       | no        | yes          | 504     |
| Plasmodium         | <i>Plasmodium falciparum</i>                      | vectorborne                   | yes                       | yes       | no           | 505     |
| Plasmodium         | <i>Plasmodium malariae</i>                        | vectorborne                   | yes                       | yes       | no           | 506     |
| Plasmodium         | <i>Plasmodium ovale</i>                           | vectorborne                   | yes                       | yes       | no           | 506,507 |
| Plasmodium         | <i>Plasmodium simium</i>                          | vectorborne                   | yes                       | yes       | yes          | 508     |
| Plasmodium         | <i>Plasmodium vivax</i>                           | vectorborne                   | yes                       | yes       | no           | 509     |
| Pneumocystis       | <i>Pneumocystis carinii</i>                       | sapronosis                    | yes                       | yes       | no           | 510     |
| Polyomavirus       | <i>JC virus</i>                                   | unknown/unclassifiable        | no                        | yes       | no           | 511,512 |
| Porphyromonas      | <i>Porphyromonas catoniae</i>                     | opportunistic/normal flora    | no                        | no        | yes          | 513-515 |
| Porphyromonas      | <i>Porphyromonas levii</i>                        | unknown/unclassifiable        | unknown                   | no        | yes          | 516,517 |
| Prevotella         | <i>Prevotella melaninogenica</i>                  | opportunistic/normal flora    | no                        | no        | yes          | 518     |
| Prevotella         | <i>Prevotella tanneriae</i>                       | opportunistic/normal flora    | no                        | no        | yes          | 514,519 |
| Prion              | <i>CJD agent</i>                                  | unknown/unclassifiable        | unknown                   | yes       | yes          | 520,521 |
| Propionibacterium  | <i>Propionibacterium propionicus</i>              | opportunistic/normal flora    | no                        | no        | yes          | 522,523 |
| Proteus            | <i>Proteus mirabilis</i>                          | opportunistic/normal flora    | no                        | yes       | no           | 524     |
| Proteus            | <i>Proteusmorganii</i>                            | opportunistic/normal flora    | no                        | yes       | no           | 524,525 |
| Pseudaallescheria  | <i>Pseudaallescheria boydii</i>                   | sapronosis                    | yes                       | yes       | no           | 526     |

| Genus               | Pathogen                               | Primary transmission category | Environmentally mediated? | WHO list? | Taylor list? | Refs     |
|---------------------|----------------------------------------|-------------------------------|---------------------------|-----------|--------------|----------|
| Pseudochaetosphaera | <i>Pseudochaetosphaeronema larense</i> | sapronosis                    | yes                       | yes       | no           | 527      |
| Pseudomonas         | <i>Pseudomonas aeruginosa</i>          | sapronosis                    | yes                       | yes       | no           | 528      |
| Pseudomonas         | <i>Pseudomonas stutzeri</i>            | foodborne                     | yes                       | no        | yes          | 529      |
| Pyramicocephalus    | <i>Pyramicocephalus anthrocephalus</i> | foodborne                     | yes                       | no        | yes          | 530      |
| Pyrenochaeta        | <i>Pyrenochaeta mackinnonii</i>        | sapronosis                    | yes                       | yes       | no           | 531,532  |
| Pyrenochaeta        | <i>Pyrenochaeta romeroi</i>            | sapronosis                    | yes                       | yes       | no           | 531,532  |
| Pythium             | <i>Pythium insidiosum</i>              | sapronosis                    | yes                       | no        | yes          | 139      |
| Rhinocladiella      | <i>Rhinocladiella aquaspersa</i>       | sapronosis                    | yes                       | yes       | no           | 533      |
| Rhinocladiella      | <i>Rhinocladiella atrovirens</i>       | sapronosis                    | yes                       | yes       | no           | 534      |
| Rhinocladiella      | <i>Rhinocladiella compacta</i>         | sapronosis                    | yes                       | no        | yes          | 535,536  |
| Rhinosporidium      | <i>Rhinosporidium seeberi</i>          | sapronosis                    | yes                       | yes       | no           | 537      |
| Rhizomucor          | <i>R miehei</i>                        | sapronosis                    | yes                       | yes       | no           | 538,539  |
| Rhizomucor          | <i>Rhizomucor pusillus</i>             | sapronosis                    | yes                       | yes       | no           | 538-540  |
| Rhizopus            | <i>R azygosporus</i>                   | sapronosis                    | yes                       | yes       | no           | 541      |
| Rhizopus            | <i>R microsporus</i>                   | sapronosis                    | yes                       | yes       | no           | 542      |
| Rhizopus            | <i>R oryzae</i>                        | sapronosis                    | yes                       | yes       | no           | 543,544  |
| Rhizopus            | <i>Rhizopus stolonifer</i>             | sapronosis                    | yes                       | yes       | yes          | 410,545, |
| Rhodococcus         | <i>Rhodococcus fascians</i>            | unknown/unclassifiable        | yes                       | no        | yes          |          |
| Rickettsia          | <i>Rickettsia africae</i>              | vectorborne                   | yes                       | no        | yes          | 547,547, |
| Rickettsia          | <i>Rickettsia akari</i>                | vectorborne                   | yes                       | yes       | no           | 549      |
| Rickettsia          | <i>Rickettsia conorii</i>              | vectorborne                   | yes                       | no        | yes          | 53,550,5 |
| Rickettsia          | <i>Rickettsia prowazekii</i>           | vectorborne                   | yes                       | yes       | no           | 552      |
| Rickettsia          | <i>Rickettsia rickettsii</i>           | vectorborne                   | yes                       | yes       | no           | 553      |
| Rickettsia          | <i>Rictularia species</i>              | unknown/unclassifiable        | unknown                   | no        | yes          | 554-556  |
| Roseolovirus        | <i>Human herpesvirus 6</i>             | human-to-human                | no                        | yes       | no           | 557      |
| Roseolovirus        | <i>Human herpesvirus 7</i>             | human-to-human                | no                        | yes       | no           | 557      |
| Rotavirus           | <i>Rotavirus A</i>                     | waterborne                    | yes                       | yes       | no           | 558-560  |
| Rotavirus           | <i>Rotavirus B</i>                     | waterborne                    | yes                       | yes       | no           | 558-560  |
| Rotavirus           | <i>Rotavirus C</i>                     | human-to-human                | no                        | yes       | yes          | 558-560  |
| Rotavirus           | <i>Rotavirus D</i>                     | waterborne                    | yes                       | yes       | no           | 558-560  |
| Rotavirus           | <i>Rotavirus E</i>                     | waterborne                    | yes                       | yes       | no           | 558-560  |
| Rotavirus           | <i>Rotavirus F</i>                     | human-to-human                | no                        | yes       | yes          | 558-560  |
| Rubivirus           | <i>Rubella virus</i>                   | human-to-human                | no                        | yes       | no           | 561,562  |
| Rubulavirus         | <i>Menangle virus</i>                  | directly zoonotic (domestic)  | yes                       | no        | yes          | 563-565  |
| Rubulavirus         | <i>Mumps</i>                           | human-to-human                | no                        | yes       | no           | 566      |
| Saccharomonospora   | <i>Saccharomonospora viridis</i>       | sapronosis                    | yes                       | no        | yes          | 567      |
| Saksenaia           | <i>Saksenaia vasiformis</i>            | sapronosis                    | yes                       | yes       | no           | 568      |
| Salmonella          | <i>Salmonella enterica</i>             | foodborne/waterborne          | yes                       | yes       | no           | 569      |
| Salmonella          | <i>Salmonella enteritidis</i>          | sapronosis                    | yes                       | yes       | no           | 425,570  |
| Salmonella          | <i>Salmonella typhi</i>                | foodborne/waterborne          | yes                       | yes       | no           | 571      |
| Salmonella          | <i>Salmonella typhimurium</i>          | sapronosis                    | yes                       | yes       | no           | 572,573  |
| Sarcocystis         | <i>Sarcocystis hominis</i>             | foodborne                     | yes                       | yes       | no           | 574      |
| Sarcocystis         | <i>Sarcocystis lindemanni</i>          | waterborne                    | yes                       | yes       | no           | 574      |
| Sarcocystis         | <i>Sarcocystis subhominis</i>          | foodborne                     | yes                       | yes       | no           | 574      |
| Schistosoma         | <i>S bovis</i>                         | waterborne                    | yes                       | yes       | no           | 7        |
| Schistosoma         | <i>S malayensis</i>                    | waterborne                    | yes                       | yes       | no           | 7,575    |
| Schistosoma         | <i>S rodhaini</i>                      | waterborne                    | yes                       | yes       | no           | 7        |
| Schistosoma         | <i>S spindale</i>                      | waterborne                    | yes                       | yes       | no           | 7        |
| Schistosoma         | <i>Schistosoma haematobium</i>         | waterborne                    | yes                       | yes       | no           | 7        |
| Schistosoma         | <i>Schistosoma intercalatum</i>        | waterborne                    | yes                       | yes       | no           | 7,576    |
| Schistosoma         | <i>Schistosoma japonicum</i>           | waterborne                    | yes                       | yes       | no           | 7,577    |
| Schistosoma         | <i>Schistosoma mansoni</i>             | waterborne                    | yes                       | yes       | no           | 7        |
| Schistosoma         | <i>Schistosoma mattheei</i>            | waterborne                    | yes                       | yes       | yes          | 7,578    |
| Schistosoma         | <i>Schistosoma mekongi</i>             | waterborne                    | yes                       | yes       | no           | 579      |
| Schistosoma         | <i>Schistosoma spindale</i>            | waterborne                    | yes                       | no        | yes          | 580      |
| Schistosomatium     | <i>S douthitti</i>                     | waterborne                    | yes                       | yes       | yes          | 7        |
| Scolecobasidium     | <i>Scolecobasidium humicola</i>        | sapronosis                    | yes                       | no        | yes          | 581      |
| Scytalidium         | <i>Scytalidium infestans</i>           | unknown/unclassifiable        | yes                       | no        | yes          | 582      |
| Selenomonas         | <i>Selenomonas artemidis</i>           | opportunistic/normal flora    | no                        | no        | yes          | 583      |
| Selenomonas         | <i>Selenomonas noxia</i>               | opportunistic/normal flora    | no                        | no        | yes          | 584      |
| Serratia            | <i>Serratia rubidaea</i>               | unknown/unclassifiable        | yes                       | no        | yes          | 585      |
| Shigella            | <i>Shigella boydii</i>                 | sapronosis                    | yes                       | yes       | no           | 586,587  |
| Shigella            | <i>Shigella dysenteriae</i>            | sapronosis                    | yes                       | yes       | yes          | 586,587  |
| Shigella            | <i>Shigella flexneri</i>               | sapronosis                    | yes                       | yes       | no           | 586,587  |
| Shigella            | <i>Shigella sonnei</i>                 | sapronosis                    | yes                       | yes       | no           | 586,587  |
| Simplexvirus        | <i>Human herpesvirus 1</i>             | human-to-human                | no                        | yes       | no           | 588      |
| Simplexvirus        | <i>Human herpesvirus 2</i>             | human-to-human                | no                        | yes       | yes          | 589      |
| Spirillum           | <i>Spirillum minus</i>                 | directly zoonotic (wildlife)  | yes                       | yes       | no           | 590,591  |
| Sporothrix          | <i>Sporothrix schenckii</i>            | sapronosis                    | yes                       | yes       | no           | 592      |
| Staphylococcus      | <i>Staphylococcus aureus</i>           | human-to-human                | no                        | yes       | no           | 593      |

| Genus              | Pathogen                                       | Primary transmission category | Environmentally mediated? | WHO list? | Taylor list? | Refs     |
|--------------------|------------------------------------------------|-------------------------------|---------------------------|-----------|--------------|----------|
| Staphylococcus     | <i>Staphylococcus warneri</i>                  | opportunistic/normal flora    | no                        | no        | yes          | 594      |
| Stenotrophomonas   | <i>Stenotrophomonas maltophilia</i>            | nosocomial                    | yes                       | no        | yes          | 595      |
| Streptobacillus    | <i>Streptobacillus moniliformis</i>            | directly zoonotic (wildlife)  | yes                       | yes       | yes          | 596      |
| Streptococcus      | <i>Streptococcus agalactiae</i>                | human-to-human                | no                        | yes       | yes          | 597      |
| Streptococcus      | <i>Streptococcus bovis</i>                     | unknown/unclassifiable        | unknown                   | yes       | no           | 598      |
| Streptococcus      | <i>Streptococcus constellatus</i>              | opportunistic/normal flora    | no                        | no        | yes          | 599      |
| Streptococcus      | <i>Streptococcus equi</i>                      | directly zoonotic (domestic)  | yes                       | yes       | yes          | 600      |
| Streptococcus      | <i>Streptococcus gordonii</i>                  | opportunistic/normal flora    | no                        | no        | yes          | 601,602  |
| Streptococcus      | <i>Streptococcus pneumoniae</i>                | human-to-human                | no                        | yes       | no           | 597      |
| Streptococcus      | <i>Streptococcus pyogenes</i>                  | human-to-human                | no                        | yes       | no           | 597      |
| Streptomyces       | <i>Streptomyces somaliensis</i>                | sapronosis                    | yes                       | yes       | no           | 603      |
| Streptomyces       | <i>Streptomyces sudanensis</i>                 | sapronosis                    | yes                       | yes       | no           | 603,604  |
| Strongyloides      | <i>S fuelleborni</i>                           | soilborne                     | yes                       | yes       | no           | 7        |
| Strongyloides      | <i>S papillosus</i>                            | soilborne                     | yes                       | yes       | yes          | 7,605    |
| Strongyloides      | <i>S stercoralis</i>                           | soilborne                     | yes                       | yes       | no           | 7        |
| Strongyloides      | <i>S westeri</i>                               | soilborne                     | yes                       | yes       | no           | 7        |
| Strongyloides      | <i>Strongyloides ransomi</i>                   | soilborne                     | yes                       | yes       | yes          | 7        |
| Taenia             | <i>T brauni (Multiceps brauni)</i>             | foodborne                     | yes                       | yes       | no           | 393      |
| Taenia             | <i>T crassiceps</i>                            | foodborne                     | yes                       | yes       | no           | 7        |
| Taenia             | <i>T glomeratus (Multiceps glomeratus)</i>     | foodborne                     | yes                       | yes       | no           | 7        |
| Taenia             | <i>T longihamatus (Multiceps longihamatus)</i> | foodborne                     | yes                       | yes       | no           | 7        |
| Taenia             | <i>T serialis</i>                              | foodborne                     | yes                       | yes       | no           | 7        |
| Taenia             | <i>T taeniaeformis</i>                         | foodborne                     | yes                       | yes       | no           | 7        |
| Taenia             | <i>Taenia saginata</i>                         | foodborne                     | yes                       | yes       | no           | 7        |
| Taenia             | <i>Taenia solium</i>                           | foodborne                     | yes                       | yes       | no           | 7        |
| Taeniolaella       | <i>Taeniolaella exilis</i>                     | unknown/unclassifiable        | yes                       | no        | yes          | 606      |
| Tatumella          | <i>Tatumella ptyseos</i>                       | unknown/unclassifiable        | no                        | no        | yes          | 607      |
| Ternidens          | <i>Ternidens deminutus</i>                     | unknown/unclassifiable        | yes                       | yes       | no           | 7        |
| Tetraploa          | <i>Tetraploa aristata</i>                      | unknown/unclassifiable        | yes                       | no        | yes          | 608      |
| Thelazia           | <i>Thelazia californiensis</i>                 | vectorborne                   | yes                       | yes       | no           | 7        |
| Thelazia           | <i>Thelazia callipaeda</i>                     | vectorborne                   | yes                       | yes       | no           | 7        |
| Thogotovirus       | <i>Batken virus</i>                            | unknown/unclassifiable        | unknown                   | no        | yes          | 609,610  |
| Toxocara           | <i>T canis</i>                                 | soilborne                     | yes                       | yes       | yes          | 7        |
| Toxocara           | <i>Toxocara cati</i>                           | soilborne                     | yes                       | yes       | yes          | 611      |
| Toxoplasma         | <i>Toxoplasma gondii</i>                       | foodborne                     | yes                       | yes       | no           | 612      |
| Trachipleistophora | <i>Trachipleistophora hominis</i>              | sapronosis                    | yes                       | yes       | no           | 233,445  |
| Treponema          | <i>Treponema carateum</i>                      | human-to-human                | no                        | yes       | no           | 613      |
| Treponema          | <i>Treponema pallidum</i>                      | human-to-human                | no                        | yes       | no           | 614      |
| Trichinella        | <i>T nativa</i>                                | foodborne                     | yes                       | yes       | no           | 7        |
| Trichinella        | <i>T pseudospiralis</i>                        | foodborne                     | yes                       | yes       | no           | 7        |
| Trichinella        | <i>T spiralis</i>                              | foodborne                     | yes                       | yes       | no           | 7        |
| Trichinella        | <i>T T5</i>                                    | foodborne                     | yes                       | yes       | no           | 615      |
| Trichinella        | <i>Trichinella britovi</i>                     | foodborne                     | yes                       | yes       | no           | 7        |
| Trichinella        | <i>Trichinella nelsoni</i>                     | foodborne                     | yes                       | yes       | no           | 7        |
| Trichoderma        | <i>Trichoderma viride</i>                      | sapronosis                    | yes                       | no        | yes          | 616      |
| Trichomonas        | <i>Trichomonas vaginalis</i>                   | human-to-human                | no                        | yes       | yes          | 617      |
| Trichophyton       | <i>T ajelloi</i>                               | sapronosis                    | yes                       | yes       | no           | 249,618, |
| Trichophyton       | <i>T bulbosum</i>                              | directly zoonotic (domestic)  | yes                       | yes       | no           | 249,618, |
| Trichophyton       | <i>T concentricum</i>                          | human-to-human                | no                        | yes       | no           | 249,618, |
| Trichophyton       | <i>T equinum</i>                               | directly zoonotic (domestic)  | yes                       | yes       | no           | 249,618, |
| Trichophyton       | <i>T gourvillii</i>                            | human-to-human                | no                        | yes       | no           | 249,618, |
| Trichophyton       | <i>T megninii</i>                              | human-to-human                | no                        | yes       | no           | 249,618, |
| Trichophyton       | <i>T mentagrophytes</i>                        | directly zoonotic (wildlife)  | yes                       | yes       | no           | 249,618, |
| Trichophyton       | <i>T rubrum</i>                                | human-to-human                | no                        | yes       | no           | 249,618, |
| Trichophyton       | <i>T schoenleinii</i>                          | human-to-human                | no                        | yes       | no           | 249,618, |
| Trichophyton       | <i>T soudanense</i>                            | human-to-human                | no                        | yes       | no           | 618-620  |
| Trichophyton       | <i>T tonsurans</i>                             | human-to-human                | no                        | yes       | no           | 249,618, |
| Trichophyton       | <i>T verrucosum</i>                            | directly zoonotic (domestic)  | yes                       | yes       | no           | 249,618, |
| Trichophyton       | <i>T violaceum</i>                             | human-to-human                | no                        | yes       | no           | 618-620  |
| Trichophyton       | <i>Trichophyton simii</i>                      | directly zoonotic (wildlife)  | yes                       | yes       | yes          | 621-623  |
| Trichosporon       | <i>Trichosporon asahii</i>                     | sapronosis                    | yes                       | yes       | yes          | 624-626  |
| Trichosporon       | <i>Trichosporon beigelii</i>                   | sapronosis                    | yes                       | yes       | no           | 627      |
| Trichosporon       | <i>Trichosporon cutaneum</i>                   | sapronosis                    | yes                       | no        | yes          | 628      |
| Trichostrongylus   | <i>T affinis</i>                               | foodborne                     | yes                       | yes       | no           | 7,629    |
| Trichostrongylus   | <i>T axei</i>                                  | foodborne                     | yes                       | yes       | no           | 7,629    |
| Trichostrongylus   | <i>T brevis</i>                                | unknown/unclassifiable        | yes                       | yes       | yes          | 630,6317 |
| Trichostrongylus   | <i>T calcaratus</i>                            | foodborne                     | yes                       | yes       | no           | 7,629    |
| Trichostrongylus   | <i>T capricola</i>                             | foodborne                     | yes                       | yes       | no           | 7,629    |
| Trichostrongylus   | <i>T colubriformis</i>                         | foodborne                     | yes                       | yes       | no           | 7,629    |
| Trichostrongylus   | <i>T instabilis</i>                            | foodborne                     | yes                       | yes       | no           | 7,629    |

| Genus            | Pathogen                           | Primary transmission category | Environmentally mediated? | WHO list? | Taylor list? | Refs     |
|------------------|------------------------------------|-------------------------------|---------------------------|-----------|--------------|----------|
| Trichostrongylus | <i>T. lerouxi</i>                  | foodborne                     | yes                       | yes       | no           | 7,629    |
| Trichostrongylus | <i>T. probulurus</i>               | foodborne                     | yes                       | yes       | no           | 7,629    |
| Trichostrongylus | <i>T. skrjabini</i>                | foodborne                     | yes                       | yes       | no           | 7,629    |
| Trichostrongylus | <i>T. vitrinus</i>                 | foodborne                     | yes                       | yes       | no           | 7,629    |
| Trichostrongylus | <i>Trichostrongylus orientalis</i> | foodborne                     | yes                       | yes       | yes          | 7,632,63 |
| Trichuris        | <i>Trichuris trichiura</i>         | soilborne                     | yes                       | yes       | no           | 55,634   |
| Tritirachium     | <i>Tritirachium oryzae</i>         | sapronosis                    | yes                       | no        | yes          | 635      |
| Trypanosoma      | <i>Trypanosoma brucei</i>          | vectorborne                   | yes                       | yes       | no           | 636      |
| Trypanosoma      | <i>Trypanosoma cruzi</i>           | vectorborne                   | yes                       | yes       | no           | 637,638  |
| Tsukamurella     | <i>Tsukamurella paurometabola</i>  | sapronosis                    | yes                       | no        | yes          | 639      |
| Varicella        | <i>Human herpesvirus 3</i>         | human-to-human                | no                        | yes       | no           | 640      |
| Vesiculovirus    | <i>Piry virus</i>                  | vectorborne                   | yes                       | yes       | no           | 641      |
| Vesiculovirus    | <i>Vesicular stomatitis virus</i>  | vectorborne                   | yes                       | yes       | no           | 642      |
| Vibrio           | <i>Vibrio cholerae</i>             | sapronosis                    | yes                       | yes       | no           | 643      |
| Vibrio           | <i>Vibrio cincinnatiensis</i>      | sapronosis                    | yes                       | no        | yes          | 644      |
| Vibrio           | <i>Vibrio parahaemolyticus</i>     | foodborne                     | yes                       | yes       | no           | 645      |
| Vibrio           | <i>Vibrio vulnificus</i>           | foodborne                     | yes                       | yes       | no           | 646      |
| Vittaforma       | <i>Vittaforma corneae</i>          | sapronosis                    | yes                       | yes       | no           | 7,233,44 |
| Volutella        | <i>Volutella cinerescens</i>       | unknown/unclassifiable        | yes                       | no        | yes          | 647      |
| Watsonius        | <i>Watsonius watsoni</i>           | foodborne                     | yes                       | yes       | no           | 7        |
| Wuchereria       | <i>Wuchereria bancrofti</i>        | vectorborne                   | yes                       | yes       | no           | 123,648  |
| Yatapoxvirus     | <i>Tanapox virus</i>               | human-to-human                | unknown                   | yes       | yes          | 649      |
| Yatapoxvirus     | <i>Yaba monkey tumor virus</i>     | directly zoonotic (wildlife)  | yes                       | yes       | no           | 650      |
| Yersinia         | <i>Yersinia enterocolitica</i>     | sapronosis                    | yes                       | yes       | no           | 651      |
| Yersinia         | <i>Yersinia frederiksenii</i>      | sapronosis                    | yes                       | no        | yes          | 652      |
| Yersinia         | <i>Yersinia intermedia</i>         | unknown/unclassifiable        | yes                       | no        | yes          | 653      |
| Yersinia         | <i>Yersinia pestis</i>             | vectorborne                   | yes                       | yes       | no           | 654      |
| Yersinia         | <i>Yersinia ruckeri</i>            | unknown/unclassifiable        | yes                       | no        | yes          | 655      |

References for this table:

- Senn L, Entenza JM, Greub G, et al. Bloodstream and endovascular infections due to Abiotrophia defectiva and Granulicatella species. *BMC Infectious Diseases* 2006; **6**. DOI:10.1186/1471-2334-6-9.
- Bouvet A, Grimont F, Grimont PAD. Streptococcus defectivus sp. nov. and Streptococcus adjacens sp. nov., Nutritionally Variant Streptococci from Human Clinical Specimens. *International Journal of Systematic Bacteriology* 1989; **39**: 290-4.
- Woo PC, Leung S-Y, Ngan AH, Lau SK, Yuen K-Y. A significant number of reported *Absidia corymbifera* (*Lichtheimia corymbifera*) infections are caused by *Lichtheimia ramosa* (syn. *Lichtheimia hongkongensis*): an emerging cause of mucormycosis. *Emerging Microbes & Infections* 2012; **1**: 1-8.
- Ahmed Khan N. Pathogenesis of Acanthamoeba infections. *Microbial Pathogenesis* 2003; **34**: 277-85.
- Visvesvara GS, Stehr-Green JK. Epidemiology of Free-Living Ameba Infections <sup>1</sup>. *The Journal of Protozoology* 1990; **37**: 25s-33s.
- Visvesvara GS, Moura H, Schuster FL. Pathogenic and opportunistic free-living amoebae: *Acanthamoeba* spp., *Balamuthia mandrillaris*, *Naegleria fowleri*, and *Sappinia diploidea*. *FEMS Immunology & Medical Microbiology* 2007; **50**: 1-26.
- Ashford RW, Crewe W. The parasites of Homo sapiens: an annotated checklist of the protozoa, helminths and arthropods for which we are home, 2 ed. London: Taylor & Francis, 2003.
- Kiredjian M, Holmes B, Kersters K, Guilvout I, De Ley J. Alcaligenes piechaudii, a New Species from Human Clinical Specimens and the Environment. *International Journal of Systematic Bacteriology* 1986; **36**: 282-7.
- Seifert H, Baginski R, Schulze A, Pulverer G. Antimicrobial susceptibility of Acinetobacter species. *Antimicrobial Agents and Chemotherapy* 1993; **37**: 750-3.
- Linde H-J, Hahn J, Holler E, Reischl U, Lehn N. Septicemia Due to Acinetobacter junii. *Journal of Clinical Microbiology* 2002; **40**: 2696-7.
- Bergogne-Bérézin E, Towner KJ. Acinetobacter spp. as nosocomial pathogens: microbiological, clinical, and epidemiological features. *Clin Microbiol Rev* 1996; **9**: 148-65.
- Das S, Saha R, Dar SA, Ramachandran VG. Acr emonium Species: A Review of the Etiological Agents of Emerging Hyalohyphomycosis. *Mycopathologia* 2010; **170**: 361-75.
- Gupta A, Srinivasan R, Kaliaperumal S, Saha I. Post-traumatic fungal endophthalmitis—a prospective study. *Eye* 2008; **22**: 13-7.

- 14 Yalaz M. Fatal disseminated *Acremonium strictum* infection in a preterm newborn: a very rare cause of neonatal septicaemia. *Journal of Medical Microbiology* 2003; **52**: 835–7.
- 15 Walsh TJ, Groll AH. Emerging fungal pathogens: evolving challenges to immunocompromised patients for the twenty-first century. *Transplant Infectious Disease* 1999; **1**: 247–61.
- 16 Matthews S, Dart A, Dowling B, Hodgson J, Hodgson D. Peritonitis associated with *Actinobacillus equuli* in horses: 51 cases. *Australian Veterinary Journal* 2001; **79**: 536–9.
- 17 Ashhurst-Smith C, Norton R, Thoreau W, Peel MM. *Actinobacillus equuli* septicemia: an unusual zoonotic infection. *J Clin Microbiol* 1998; **36**: 2789–90.
- 18 Trujillo ME, Goodfellow M. *Actinomadura*. In: Whitman WB, Rainey F, Kämpfer P, *et al.*, eds. *Bergey's Manual of Systematics of Archaea and Bacteria*. Chichester, UK: John Wiley & Sons, Ltd, 2015: 1–32.
- 19 Valour F, Ferry T, Karsenty J, *et al.* Actinomycosis: etiology, clinical features, diagnosis, treatment, and management. *Infection and Drug Resistance* 2014; : 183.
- 20 McVey DS, Kennedy M, Chengappa MM, editors. *Veterinary microbiology*, 3rd ed. Ames, Iowa: Wiley-Blackwell, 2013.
- 21 Apotheloz C, Regamey C. Disseminated Infection Due to *Actinomyces meyeri*: Case Report and Review. *Clinical Infectious Diseases* 1996; **22**: 621–5.
- 22 Shoop WL, Corkum KC. Epidemiology of *Alaria marcianae* mesocercariae in Louisiana. *J Parasitol* 1981; **67**: 928–31.
- 23 Ijaz MK, Brunner AH, Sattar SA, Nair RC, Johnson-Lussenburg CM. Survival Characteristics of Airborne Human Coronavirus 229E. *Journal of General Virology* 1985; **66**: 2743–8.
- 24 Tellier R. Review of Aerosol Transmission of Influenza A Virus. *Emerg Infect Dis* 2006; **12**: 1657–62.
- 25 Vega-Rúa A, Lourenço-de-Oliveira R, Mousson L, *et al.* Chikungunya Virus Transmission Potential by Local *Aedes* Mosquitoes in the Americas and Europe. *PLoS Negl Trop Dis* 2015; **9**: e0003780.
- 26 Nickerson JP, Kannabiran S, Burbank HN. MRI findings in eastern equine encephalitis: the “parenthesis” sign. *Clinical Imaging* 2016; **40**: 222–3.
- 27 Reisler RB, Gibbs PH, Danner DK, Boudreau EF. Immune interference in the setting of same-day administration of two similar inactivated alphavirus vaccines: Eastern equine and western equine encephalitis. *Vaccine* 2012; **30**: 7271–7.
- 28 Hoyer JJ, Acevedo C, Wiggins K, Alto BW, Burkett-Cadena ND. Patterns of Abundance, Host Use, and Everglades Virus Infection in *Culex (Melanoconion) cedecei* Mosquitoes, Florida, USA. *Emerg Infect Dis* 2019; **25**: 1093–100.
- 29 Lanciotti RS, Ludwig ML, Rwaguma EB, *et al.* Emergence of Epidemic O'nyong-nyong Fever in Uganda after a 35-Year Absence: Genetic Characterization of the Virus. *Virology* 1998; **252**: 258–68.
- 30 Turell MJ, Lundström JO, Niklasson B. Transmission of Ockelbo Virus by *Aedes cinereus*, *Ae. communis*, and *Ae. excrucians* (Diptera: Culicidae) Collected in an Enzootic Area in Central Sweden. *Journal of Medical Entomology* 1990; **27**: 266–8.
- 31 Harley D, Sleigh A, Ritchie S. Ross River Virus Transmission, Infection, and Disease: a Cross-Disciplinary Review. *Clinical Microbiology Reviews* 2001; **14**: 909–32.
- 32 Weaver SC, Ferro C, Barrera R, Boshell J, Navarro J-C. VENEZUELAN EQUINE ENCEPHALITIS. *Annu Rev Entomol* 2004; **49**: 141–74.
- 33 Allison AB, Stallknecht DE, Holmes EC. Evolutionary genetics and vector adaptation of recombinant viruses of the western equine encephalitis antigenic complex provides new insights into alphavirus diversity and host switching. *Virology* 2015; **474**: 154–62.
- 34 Romano C, Fimiani M, Pellegrino M, *et al.* Cutaneous phaeohyphomycosis due to *Alternaria tenuissima*. *Mycoses* 1996; **39**: 211–5.
- 35 Robertshaw H, Higgins E. Cutaneous infection with *Alternaria tenuissima* in an immunocompromised patient. *Br J Dermatol* 2005; **153**: 1047–9.
- 36 Yoshida Y. Comparative studies on *Ancylostoma braziliense* and *Ancylostoma ceylanicum*. I. The adult stage. *J Parasitol* 1971; **57**: 983–9.
- 37 Prociw P, Croese J. Human enteric infection with *Ancylostoma caninum*: hookworms reappraised in the light of a “new” zoonosis. *Acta Tropica* 1996; **62**: 23–44.
- 38 Traub RJ. *Ancylostoma ceylanicum*, a re-emerging but neglected parasitic zoonosis. *International Journal for Parasitology* 2013; **43**: 1009–15.
- 39 Brooker S, Clements ACA, Bundy DAP. Global Epidemiology, Ecology and Control of Soil-Transmitted Helminth Infections. In: *Advances in Parasitology*. Elsevier, 2006: 221–61.
- 40 Hotez PJ, Brooker S, Bethony JM, Bottazzi ME, Loukas A, Xiao S. Hookworm Infection. *N Engl J Med* 2004; **351**: 799–807.

- 41 Pien FD, Pien BC. *Angiostrongylus cantonensis* eosinophilic meningitis. *International Journal of Infectious Diseases* 1999; **3**: 161–3.
- 42 Slom TJ, Cortese MM, Gerber SI, *et al.* An Outbreak of Eosinophilic Meningitis Caused by *Angiostrongylus cantonensis* in Travelers Returning from the Caribbean. *N Engl J Med* 2002; **346**: 668–75.
- 43 Ellis D, Women's and Children's Hospital (Adelaide SA), Mycology Unit. Descriptions of medical fungi. North Adelaide, S. Aust.: The authors, 2007.
- 44 Cano J, Guarro J. The genus *Aphanoascus*. *Mycological Research* 1990; **94**: 355–77.
- 45 Chakrabarti A, Ghosh A, Prasad GS, *et al.* *Apophysomyces elegans*: an Emerging Zygomycete in India. *J Clin Microbiol* 2003; **41**: 783–8.
- 46 Levy CE, Pedro RJ, Von Nowakowski A, Holanda LM, Brocchi M, Ramos MC. *Arcanobacterium pyogenes* Sepsis in Farmer, Brazil. *Emerg Infect Dis* 2009; **15**: 1131–2.
- 47 Madsen M, Høi Sørensen G, Aalbaek B, Hansen JW, Bjørn H. Summer mastitis in heifers: studies on the seasonal occurrence of *Actinomyces pyogenes*, *Peptostreptococcus indolicus* and *Bacteroidaceae* in clinically healthy cattle in Denmark. *Vet Microbiol* 1992; **30**: 243–55.
- 48 Grant A, Seregin A, Huang C, *et al.* Junin virus pathogenesis and virus replication. *Viruses* 2012; **4**: 2317–39.
- 49 Enria DA, Briggiler AM, Feuillade MR. An overview of the epidemiological, ecological and preventive hallmarks of Argentine haemorrhagic fever (Junin virus). *Bulletin de l'Institut Pasteur* 1998; **96**: 103–14.
- 50 McCormick JB, Fisher-Hoch SP. Lassa fever. *Curr Top Microbiol Immunol* 2002; **262**: 75–109.
- 51 Kuns ML. Epidemiology of Machupo Virus Infection. *The American Journal of Tropical Medicine and Hygiene* 1965; **14**: 813–6.
- 52 Chai J-Y, Shin E-H, Lee S-H, Rim H-J. Foodborne Intestinal Flukes in Southeast Asia. *Korean J Parasitol* 2009; **47**: S69.
- 53 Walker M, Hall A, Basáñez M-G. *Ascaris lumbricoides*. In: *Ascaris: The Neglected Parasite*. Elsevier, 2013: 155–201.
- 54 Brooker SJ, Pullan RL. *Ascaris lumbricoides* and Ascariasis. In: *Ascaris: The Neglected Parasite*. Elsevier, 2013: 343–62.
- 55 Bethony J, Brooker S, Albonico M, *et al.* Soil-transmitted helminth infections: ascariasis, trichuriasis, and hookworm. *The Lancet* 2006; **367**: 1521–32.
- 56 Linares G, McGarry PA, Baker RD. Solid solitary aspergillotic granuloma of the brain: Report of a case due to *Aspergillus candidus* and review of the literature. *Neurology* 1971; **21**: 177–177.
- 57 Coriglione G, Stella G, Gafa L, *et al.* *Neosartorya fischeri* var *fischeri* (Wehmer) Malloch and Cain 1972 (Anamorph: *Aspergillus fischerianus* Samson and Gams 1985) as a cause of mycotic keratitis. *Eur J Epidemiol* 1990; **6**: 382–5.
- 58 Roselle GA, Baird IM. *Aspergillus flavipes* group osteomyelitis. *Arch Intern Med* 1979; **139**: 590–2.
- 59 Hedayati MT, Pasqualotto AC, Warn PA, Bowyer P, Denning DW. *Aspergillus flavus*: human pathogen, allergen and mycotoxin producer. *Microbiology* 2007; **153**: 1677–92.
- 60 Latgé JP. *Aspergillus fumigatus* and aspergillosis. *Clin Microbiol Rev* 1999; **12**: 310–50.
- 61 Hodgson MJ, Morey P, Leung W-Y, *et al.* Building-Associated Pulmonary Disease From Exposure to *Stachybotrys chartarum* and *Aspergillus versicolor*: *Journal of Occupational & Environmental Medicine* 1998; **40**: 241–9.
- 62 Segal BH, DeCarlo ES, Kwon-Chung KJ, Malech HL, Gallin JI, Holland SM. *Aspergillus nidulans* Infection in Chronic Granulomatous Disease. *Medicine* 1998; **77**: 345–54.
- 63 Schuster E, Dunn-Coleman N, Frisvad JC, Van Dijck PWM. On the safety of *Aspergillus niger*—a review. *Appl Microbiol Biotechnol* 2002; **59**: 426–35.
- 64 Steinbach WJ, Benjamin DK, Kontoyiannis DP, *et al.* Infections due to *Aspergillus terreus*: a multicenter retrospective analysis of 83 cases. *Clin Infect Dis* 2004; **39**: 192–8.
- 65 Warris A, Bjørneklett A, Gaustad P. Invasive pulmonary aspergillosis associated with infliximab therapy. *N Engl J Med* 2001; **344**: 1099–100.
- 66 Halsey C, Lumley H, Luckit J. Necrotising external otitis caused by *Aspergillus wentii*: a case report: Necrotising external otitis caused by *A. wentii*. *Mycoses* 2011; **54**: e211–3.
- 67 Blyth W, Grant IWB, Blackadder ES, Greenberg M. Fungal antigens as a source of sensitization and respiratory disease in Scottish maltworkers. *Clinical & Experimental Allergy* 1977; **7**: 549–62.
- 68 Blyth W. The occurrence and nature of alveolitis-inducing substances in *Aspergillus clavatus*. *Clin Exp Immunol* 1978; **32**: 272–82.



- 69 Cooper RC, Olivieri AW, Danielson RE, Badger PG. Evaluation of military field-water quality: Volume 6, Infectious organisms of military concern associated with nonconsumptive exposure: Assessment of health risks and recommendations for establishing related standards. 1986.
- 70 Alexander DJ. Newcastle disease and other avian paramyxoviruses. *Rev - Off Int Epizoot* 2000; **19**: 443–62.
- 71 Homer MJ, Aguilar-Delfin I, Telford SR, Krause PJ, Persing DH. Babesiosis. *Clin Microbiol Rev* 2000; **13**: 451–69.
- 72 Vannier E, Gewurz B, Krause P. Human Babesiosis. *Elsevier* 2008. <https://www-clinicalkey-com.stanford.idm.oclc.org/#!/content/playContent/1-s2.0-S0891552008000251?returnurl=null&referrer=null> (accessed March 14, 2020).
- 73 Turnbull PC. Definitive identification of *Bacillus anthracis*--a review. *J Appl Microbiol* 1999; **87**: 237–40.
- 74 Ganz HH, Turner WC, Brodie EL, et al. Interactions between *Bacillus anthracis* and Plants May Promote Anthrax Transmission. *PLOS Neglected Tropical Diseases* 2014; **8**: e2903.
- 75 Ehling-Schulz M, Fricker M, Scherer S. *Bacillus cereus*, the causative agent of an emetic type of food-borne illness. *Mol Nutr Food Res* 2004; **48**: 479–87.
- 76 Krawczyk AO, de Jong A, Holsappel S, et al. Genome Sequences of 12 Spore-Forming *Bacillus* Species, Comprising *Bacillus coagulans*, *Bacillus licheniformis*, *Bacillus amyloliquefaciens*, *Bacillus sporothermodurans*, and *Bacillus vallismortis*, Isolated from Foods. *Genome Announc* 2016; **4**. DOI:10.1128/genomeA.00103-16.
- 77 Wenzler E, Kamboj K, Balada-Llasat J-M. Severe Sepsis Secondary to Persistent *Lysinibacillus sphaericus*, *Lysinibacillus fusiformis* and *Paenibacillus amylolyticus* Bacteremia. *International Journal of Infectious Diseases* 2015; **35**: 93–5.
- 78 Kellen WR, Clark TB, Lindegren JE, Ho BC, Rogoff MH, Singer S. *Bacillus sphaericus* Neide as a pathogen of mosquitoes. *Journal of Invertebrate Pathology* 1965; **7**: 442–8.
- 79 Hertlein BC, Levy R, Miller TW. Recycling potential and selective retrieval of *Bacillus sphaericus* from soil in a mosquito habitat. *Journal of Invertebrate Pathology* 1979; **33**: 217–21.
- 80 Waterfield NR, Wren BW, French-Constant RH. Invertebrates as a source of emerging human pathogens. *Nature Reviews Microbiology* 2004; **2**: 833–41.
- 81 Sack RB, Myers LL, Almeida - Hill J, et al. Enterotoxigenic *Bacteroides fragilis*: Epidemiologic Studies of its Role as a Human Diarrhoeal Pathogen. *Journal of Diarrhoeal Diseases Research* 1992; **10**: 4–9.
- 82 Xu J, Bjursell MK, Himrod J, et al. A Genomic View of the Human-*Bacteroides thetaiotaomicron* Symbiosis. *Science* 2003; **299**: 2074–6.
- 83 Curtis MM, Hu Z, Klimko C, Narayanan S, Deberardinis R, Sperandio V. The gut commensal *Bacteroides thetaiotaomicron* exacerbates enteric infection through modification of the metabolic landscape. *Cell Host Microbe* 2014; **16**: 759–69.
- 84 Wexler HM. *Bacteroides*: the Good, the Bad, and the Nitty-Gritty. *CMR* 2007; **20**: 593–621.
- 85 Arean VM, Koppisch E. Balantidiasis; a review and report of cases. *Am J Pathol* 1956; **32**: 1089–115.
- 86 Schuster FL, Ramirez-Avila L. Current world status of *Balantidium coli*. *Clin Microbiol Rev* 2008; **21**: 626–38.
- 87 Brenner DJ, O'connor SP, Winkler HH, Steigerwalt AG. Proposals to unify the genera *Bartonella* and *Rochalimaea*, with descriptions of *Bartonella quintana* comb. nov., *Bartonella vinsonii* comb. nov., *Bartonella henselae* comb. nov., and *Bartonella elizabethae* comb. nov., and to remove the family Bartonellaceae from the order Rickettsiales. *International journal of systematic bacteriology* 1993. DOI:10.1099/00207713-43-4-777.
- 88 Ihler GM. *Bartonella bacilliformis*: dangerous pathogen slowly emerging from deep background. *FEMS Microbiol Lett* 1996; **144**: 1–11.
- 89 Chomel BB, Boulouis H-J, Maruyama S, Breitschwerdt EB. *Bartonella* Spp. in Pets and Effect on Human Health. *Emerg Infect Dis* 2006; **12**: 389–94.
- 90 Ohl ME, Spach DH. *Bartonella quintana* and urban trench fever. *Clin Infect Dis* 2000; **31**: 131–5.
- 91 Breitschwerdt EB. Bartonellosis: One Health Perspectives for an Emerging Infectious Disease. *ILAR J* 2014; **55**: 46–58.
- 92 Gugnani HC. A review of zygomycosis due to *Basidiobolus ranarum*. *Eur J Epidemiol* 1999; **15**: 923–9.
- 93 Sorvillo F, Ash LR, Berlin OGW, Yatabe J, Degiorgio C, Morse SA. *Baylisascaris procyonis*: An Emerging Helminthic Zoonosis. *Emerg Infect Dis* 2002; **8**: 355–9.
- 94 Rehner SA, Minnis AM, Sung G-H, Luangsa-ard JJ, Devotto L, Humber RA. Phylogeny and systematics of the anamorphic, entomopathogenic genus *Beauveria*. *Mycologia* 2011; **103**: 1055–73.
- 95 Gaunt ER, Hardie A, Claas ECJ, Simmonds P, Templeton KE. Epidemiology and clinical presentations of the four human coronaviruses 229E, HKU1, NL63, and OC43 detected over 3 years using a novel multiplex real-time PCR method. *J Clin Microbiol* 2010; **48**: 2940–7.

- 96 Flanagan KL, Bryceson ADM. Disseminated Infection Due to *Bipolaris australiensis* in a Young Immunocompetent Man: Case Report and Review. *Clin Infect Dis* 1997; **25**: 311–3.
- 97 Walsh TJ, Groll AH. Emerging fungal pathogens: evolving challenges to immunocompromised patients for the twenty-first century. *Transplant Infectious Disease* 1999; **1**: 247–61.
- 98 Chowdhary A, Randhawa HS, Singh V, *et al.* *Bipolaris hawaiiensis* as etiologic agent of allergic bronchopulmonary mycosis: first case in a paediatric patient. *Med Mycol* 2011; **49**: 760–5.
- 99 Chapman SW, Dismukes WE, Proia LA, *et al.* Clinical Practice Guidelines for the Management of Blastomycosis: 2008 Update by the Infectious Diseases Society of America. *Clinical Infectious Diseases* 2008; **46**: 1801–12.
- 100 Sarosi GA, Davies SF. Blastomycosis. *Am Rev Respir Dis* 1979; **120**: 911–38.
- 101 Galeziok M, Roberts I, Passalacqua J-A. *Bordetella bronchiseptica* pneumonia in a man with acquired immunodeficiency syndrome: a case report. *J Med Case Reports* 2009; **3**: 76.
- 102 Goodnow RA. Biology of *Bordetella bronchiseptica*. *Microbiol Rev* 1980; **44**: 722–38.
- 103 Porter JF, Parton R, Wardlaw AC. Growth and survival of *Bordetella bronchiseptica* in natural waters and in buffered saline without added nutrients. *Appl Environ Microbiol* 1991; **57**: 1202–6.
- 104 Khelef N, Danve B, Quentin-Millet MJ, Guiso N. *Bordetella pertussis* and *Bordetella parapertussis*: two immunologically distinct species. *Infect Immun* 1993; **61**: 486–90.
- 105 Heininger U, Stehr K, Schmitt-Grohé S, *et al.* Clinical characteristics of illness caused by *Bordetella parapertussis* compared with illness caused by *Bordetella pertussis*. *Pediatr Infect Dis J* 1994; **13**: 306–9.
- 106 Parkhill J, Sebahia M, Preston A, *et al.* Comparative analysis of the genome sequences of *Bordetella pertussis*, *Bordetella parapertussis* and *Bordetella bronchiseptica*. *Nature Genetics* 2003; **35**: 32–40.
- 107 Danthis M. Whooping cough. *Nurs Stand* 2014; **28**: 53.
- 108 Trainor EA, Nicholson TL, Merkel TJ. *Bordetella pertussis* transmission. *Pathog Dis* 2015; **73**: ftv068.
- 109 Rott R, Herzog S, Fleischer B, *et al.* Detection of serum antibodies to Borna disease virus in patients with psychiatric disorders. *Science* 1985; **228**: 755–6.
- 110 Staeheli P, Sauder C, Hausmann J, Ehrensperger F, Schwemmler M. Epidemiology of Borna disease virus. *Journal of General Virology*, 2000; **81**: 2123–35.
- 111 Johnson RC, Schmid GP, Hyde FW, Steigerwalt AG, Brenner DJ. *Borrelia burgdorferi* sp. nov.: Etiologic Agent of Lyme Disease. *International Journal of Systematic Bacteriology* 1984; **34**: 496–7.
- 112 Fraser CM, Casjens S, Huang WM, *et al.* Genomic sequence of a Lyme disease spirochaete, *Borrelia burgdorferi*. *Nature* 1997; **390**: 580–6.
- 113 Schwan TG, Raffel SJ, Schrupf ME, Porcella SF. Diversity and Distribution of *Borrelia hermsii*. *Emerg Infect Dis* 2007; **13**: 436–42.
- 114 Assous MV, Wilamowski A. Relapsing fever borreliosis in Eurasia—forgotten, but certainly not gone! *Clinical Microbiology and Infection* 2009; **15**: 407–14.
- 115 Parola P, Ryelandt J, Mangold AJ, Mediannikov O, Guglielmo AA, Raoult D. Relapsing fever *Borrelia* in *Ornithodoros* ticks from Bolivia. *Ann Trop Med Parasitol* 2011; **105**: 407–11.
- 116 Cutler SJ, Moss J, Fukunaga M, Wright DJ, Fekade D, Warrell D. *Borrelia recurrentis* characterization and comparison with relapsing-fever, Lyme-associated, and other *Borrelia* spp. *Int J Syst Bacteriol* 1997; **47**: 958–68.
- 117 Lyons DC. The Incidence and Significance of the Presence of *Borrelia vincenti* and Other Spirochaetaceae on Beverage Glasses. *J Bacteriol* 1936; **31**: 523–6.
- 118 Rebaudet S, Parola P. Epidemiology of relapsing fever borreliosis in Europe. *FEMS Immunol Med Microbiol* 2006; **48**: 11–5.
- 119 Benoldi D, Alinovi A, Polonelli L, *et al.* *Botryomyces caespitosus* as an agent of cutaneous phaeohiphomycosis. *J Med Vet Mycol* 1991; **29**: 9–13.
- 120 Godfroid J, Cloeckaert A, Liautard J-P, *et al.* From the discovery of the Malta fever's agent to the discovery of a marine mammal reservoir, brucellosis has continuously been a re-emerging zoonosis. *Vet Res* 2005; **36**: 313–26.
- 121 Roop RM, Gaines JM, Anderson ES, Caswell CC, Martin DW. Survival of the fittest: how *Brucella* strains adapt to their intracellular niche in the host. *Med Microbiol Immunol* 2009; **198**. DOI:10.1007/s00430-009-0123-8.
- 122 Fischer P, Supali T, Maizels RM. Lymphatic filariasis and *Brugia timori*: prospects for elimination. *Trends Parasitol* 2004; **20**: 351–5.

- 123 Ottesen EA, Duke BO, Karam M, Behbehani K. Strategies and tools for the control/elimination of lymphatic filariasis. *Bull World Health Organ* 1997; **75**: 491–503.
- 124 Jex AR, Waeschenbach A, Hu M, *et al.* The mitochondrial genomes of *Ancylostoma caninum* and *Bunostomum phlebotomum* – two hookworms of animal health and zoonotic importance. *BMC Genomics* 2009; **10**: 79.
- 125 Beaver PC. Larva migrans. *Experimental Parasitology* 1956; **5**: 587–621.
- 126 Smithburn KC, Paterson HE, Kokernot RH, de Meillon B. Isolation of Bunyamwera Virus from a Naturally Infected Human Being and Further Isolations from *Aedes* (*Banksinella*) *Circumluteolus* Theo. 1. *The American Journal of Tropical Medicine and Hygiene* 1958; **7**: 579–84.
- 127 Silva EB, Dow SW. Development of *Burkholderia mallei* and *pseudomallei* vaccines. *Front Cell Infect Microbiol* 2013; **3**: 10.
- 128 Inglis TJJ, Sagripanti J-L. Environmental factors that affect the survival and persistence of *Burkholderia pseudomallei*. *Appl Environ Microbiol* 2006; **72**: 6865–75.
- 129 Wilson R, Anderson LJ, Holman RC, Gary GW, Greenberg HB. Waterborne Gastroenteritis due to the Norwalk Agent: Clinical and Epidemiologic Investigation. *Am J Public Health* 1982; **72**: 72–4.
- 130 Kohn MA, Farley TA, Ando T, *et al.* An Outbreak of Norwalk Virus Gastroenteritis Associated With Eating Raw Oysters: Implications for Maintaining Safe Oyster Beds. *JAMA* 1995; **273**: 466–71.
- 131 Kapperud G, Skjerve E, Bean NH, Ostroff SM, Lassen J. Risk factors for sporadic *Campylobacter* infections: results of a case-control study in southeastern Norway. *Journal of Clinical Microbiology* 1992; **30**: 3117–21.
- 132 Friedman CR, Hoekstra RM, Samuel M, *et al.* Risk factors for sporadic *Campylobacter* infection in the United States: A case-control study in FoodNet sites. *Clin Infect Dis* 2004; **38 Suppl 3**: S285–296.
- 133 Pfaller MA. Nosocomial candidiasis: emerging species, reservoirs, and modes of transmission. *Clin Infect Dis* 1996; **22 Suppl 2**: S89–94.
- 134 Calderone RA, Fonzi WA. Virulence factors of *Candida albicans*. *Trends Microbiol* 2001; **9**: 327–35.
- 135 Singh R, Parija SC. *Candida parapsilosis* : an emerging fungal pathogen. *Indian Journal of Medical Research* 2012; **136**: 671.
- 136 SAMARANAYAKE YH, SAMARANAYAKE LP. *Candida krusei*: biology, epidemiology, pathogenicity and clinical manifestations of an emerging pathogen. *Journal of Medical Microbiology*, 1994; **41**: 295–310.
- 137 Wingard JR, Merz WG, Rinaldi MG, Johnson TR, Karp JE, Saral R. Increase in *Candida krusei* Infection among Patients with Bone Marrow Transplantation and Neutropenia Treated Prophylactically with Fluconazole. *New England Journal of Medicine* 1991; **325**: 1274–7.
- 138 Merz WG, Karp JE, Schron D, Saral R. Increased incidence of fungemia caused by *Candida krusei*. *Journal of Clinical Microbiology* 1986; **24**: 581–4.
- 139 Gastra W, Lipman LJA. *Capnocytophaga canimorsus*. *Vet Microbiol* 2010; **140**: 339–46.
- 140 Brenner DJ, Hollis DG, Fanning GR, Weaver RE. *Capnocytophaga canimorsus* sp. nov. (formerly CDC group DF-2), a cause of septicemia following dog bite, and *C. cynodegmi* sp. nov., a cause of localized wound infection following dog bite. *J Clin Microbiol* 1989; **27**: 231–5.
- 141 Parenti DM, Snyderman DR. *Capnocytophaga* Species: Infections in Nonimmunocompromised and Immunocompromised Hosts. *J Infect Dis* 1985; **151**: 140–7.
- 142 Wormser GP, Bottone EJ. *Cardiobacterium hominis*: review of microbiologic and clinical features. *Rev Infect Dis* 1983; **5**: 680–91.
- 143 Malani AN, Aronoff DM, Bradley SF, Kauffman CA. *Cardiobacterium hominis* endocarditis: Two cases and a review of the literature. *Eur J Clin Microbiol Infect Dis* 2006; **25**: 587–95.
- 144 Slotnick IJ, Dougherty M. FURTHER CHARACTERIZATION OF AN UNCLASSIFIED GROUP OF BACTERIA CAUSING ENDOCARDITIS IN MAN: *CARDIOBACTERIUM HOMINIS* GEN. ET SP. N. *Antonie Van Leeuwenhoek* 1964; **30**: 261–72.
- 145 Rams TE, Hawley CE, Whitaker EJ, Degener JE, van Winkelhoff AJ. *Centipeda periodontii* in human periodontitis. *Odontology* 2015; **103**: 286–91.
- 146 LAI C-H, MALES BM, DOUGHERTY PA, BERTHOLD P, LISTGARTEN MA. *Centipeda periodontii* gen. nov., sp. nov. from Human Periodontal Lesions. *International Journal of Systematic and Evolutionary Microbiology*, 1983; **33**: 628–35.
- 147 Scholz T, Salgado-Maldonado G. The Introduction and Dispersal of *Centrocestus formosanus* (Nishigori, 1924) (Digenea: Heterophyidae) in Mexico: A Review. *Amid* 2000; **143**: 185–200.
- 148 Han ET, Shin EH, Phommakorn S, *et al.* *Centrocestus formosanus* (Digenea: Heterophyidae) encysted in the freshwater fish, *Puntius brevis*, from Lao PDR. *Korean J Parasitol* 2008; **46**: 49–53.

- 149 Chai J-Y, Sohn W-M, Yong T-S, *et al.* Centrocestus formosanus (Heterophyidae): Human Infections and the Infection Source in Lao PDR. *para* 2013; **99**: 531–6.
- 150 Guppy KH, Thomas C, Thomas K, Anderson D. Cerebral Fungal Infections in the Immunocompromised Host: A Literature Review and a New Pathogen—*Chaetomium atrobrunneum*: Case Report. *Neurosurgery* 1998; **43**: 1463–9.
- 151 Barron MA, Sutton DA, Veve R, *et al.* Invasive Mycotic Infections Caused by *Chaetomium perlucidum*, a New Agent of Cerebral Phaeohyphomycosis. *Journal of Clinical Microbiology* 2003; **41**: 5302–7.
- 152 Brewis C, McFerran DJ. ‘Farmer’s ear’: sudden sensorineural hearing loss due to *Chlamydia psittaci* infection. *The Journal of Laryngology & Otology* 1997; **111**: 855–7.
- 153 Vanrompay D, Ducatelle R, Haesebrouck F. *Chlamydia psittaci* infections: a review with emphasis on avian chlamydiosis. *Vet Microbiol* 1995; **45**: 93–119.
- 154 Malhotra M, Sood S, Mukherjee A, Muralidhar S, Bala M. Genital *Chlamydia trachomatis*: An update. *Indian J Med Res* 2013; **138**: 303–16.
- 155 Thomas PA, Geraldine P. Oculomycosis. In: Topley & Wilson’s Microbiology and Microbial Infections. American Cancer Society, 2010. DOI:10.1002/9780470688618.taw0143.
- 156 Szabo NJ, Matulka RA, Chan T. Safety evaluation of Whole Alginate Protein (WAP) from *Chlorella protothecoides*. *Food Chem Toxicol* 2013; **59**: 34–45.
- 157 Hoque SN, Graham J, Kaufmann ME, Tabaqchali S. *Chryseobacterium* (Flavobacterium) meningosepticum outbreak associated with colonization of water taps in a neonatal intensive care unit. *J Hosp Infect* 2001; **47**: 188–92.
- 158 Dzeing-Ella A, Szwebel TA, Loubinoux J, *et al.* Infective endocarditis due to *Citrobacter koseri* in an immunocompetent adult. *J Clin Microbiol* 2009; **47**: 4185–6.
- 159 Markova IA, Romanenko AS, Dukhanina AV. [Isolation of bacteria of the family enterobacteriaceae from plant tissues]. *Mikrobiologija* 2005; **74**: 663–6.
- 160 Borenshtein D, Schauer DB. The Genus *Citrobacter*. In: Dworkin M, Falkow S, Rosenberg E, Schleifer K-H, Stackebrandt E, eds. *The Prokaryotes*. Springer New York, 2006: 90–8.
- 161 Doran TI. The Role of *Citrobacter* in Clinical Disease of Children: Review. *Clin Infect Dis* 1999; **28**: 384–94.
- 162 Chopin JB, Sigler L, Connole MD, O’Boyle DA, Mackay B, Goldstein L. Keratomycosis in a Percheron cross horse caused by *Cladorrhinum bulbiliosum*. *J Med Vet Mycol* 1997; **35**: 53–5.
- 163 Zapater RC, Scattini F. Mycotic keratitis by *Cladorrhinum*. *Sabouraudia* 1979; **17**: 65–9.
- 164 Namratha N, Nadgir S, Kale M, Rathod R. Chromoblastomycosis due to *Cladosporium carrionii*. *J Lab Physicians* 2010; **2**: 47–8.
- 165 Chung DI, Moon CH, Kong HH, Choi DW, Lim DK. The first human case of *Clinostomum complanatum* (Trematoda: Clinostomidae) infection in Korea. *Korean J Parasitol* 1995; **33**: 219–23.
- 166 Baldassi L. Clostridial toxins: potent poisons, potent medicines. *Journal of Venomous Animals and Toxins including Tropical Diseases* 2005; **11**: 391–411.
- 167 Shapiro RL, Hatheway C, Swerdlow DL. Botulism in the United States: a clinical and epidemiologic review. *Ann Intern Med* 1998; **129**: 221–8.
- 168 Marsh JW, O’Leary MM, Shutt KA, *et al.* Multilocus Variable-Number Tandem-Repeat Analysis for Investigation of *Clostridium difficile* Transmission in Hospitals. *Journal of Clinical Microbiology* 2006; **44**: 2558–66.
- 169 Viswanathan VK, Mallozzi MJ, Vedantam G. *Clostridium difficile* infection: An overview of the disease and its pathogenesis, epidemiology and interventions. *Gut Microbes* 2010; **1**: 234–42.
- 170 Shimizu T, Ohtani K, Hirakawa H, *et al.* Complete genome sequence of *Clostridium perfringens*, an anaerobic flesh-eater. *Proc Natl Acad Sci USA* 2002; **99**: 996–1001.
- 171 Cooper KK, Songer JG. Virulence of *Clostridium perfringens* in an experimental model of poultry necrotic enteritis. *Vet Microbiol* 2010; **142**: 323–8.
- 172 Shoemith JG, Holland KT. The germination of spores of *Clostridium tetani*. *J Gen Microbiol* 1972; **70**: 253–61.
- 173 Hatheway CL. Toxigenic clostridia. *Clin Microbiol Rev* 1990; **3**: 66–98.
- 174 Emmons, Ashburn. THE ISOLATION OF HAPLOSPORANGIUM PARVUM N. SPAND COCCIDIOIDES IMMIS FROM WILD RODENTS. THEIR RELATIONSHIP TO COCCIDIOIDOMYCOSIS. *Public Health Rep* 1942; **57**: 1715–46.
- 175 Kemna ME, Neri RC, Ali R, Salkin IF. *Cokeromyces recurvatus*, a mucoraceous zygomycete rarely isolated in clinical laboratories. *J Clin Microbiol* 1994; **32**: 843–5.

- 176 Romero JR, Simonsen KA. Powassan Encephalitis and Colorado Tick Fever. *Infectious disease clinics of North America* 2008; **22**: 545–59.
- 177 Moutailler S, Popovici I, Devillers E, Vayssier-Taussat M, Eloit M. Diversity of viruses in *Ixodes ricinus*, and characterization of a neurotropic strain of Eyach virus. *New Microbes and New Infections* 2016; **11**: 71–81.
- 178 Walsh TJ, Renshaw G, Andrews J, et al. Invasive Zygomycosis Due to *Conidiobolus incongruus*. *Clin Infect Dis* 1994; **19**: 423–30.
- 179 Kimura M, Yaguchi T, Sutton DA, Fothergill AW, Thompson EH, Wickes BL. Disseminated Human Conidiobolomycosis Due to *Conidiobolus lamprauges*. *J Clin Microbiol* 2011; **49**: 752–6.
- 180 Taylor GD, Sekhon AS, Tyrrell DLJ, Goldsand G. Rhinofacial Zygomycosis Caused by *Conidiobolus coronatus*: A Case Report Including in Vitro Sensitivity to Antimycotic Agents. *The American Journal of Tropical Medicine and Hygiene* 1987; **36**: 398–401.
- 181 Nayak DR, Pillai S, Rao L. Rhinofacial zygomycosis caused by *conidiobolus coronatus*. *Indian J Otolaryngol Head Neck Surg* 2004; **56**: 225–7.
- 182 Mandlik A, Swierczynski A, Das A, Ton-That H. *Corynebacterium diphtheriae* employs specific minor pilins to target human pharyngeal epithelial cells. *Mol Microbiol* 2007; **64**: 111–24.
- 183 Funke G, von Graevenitz A, Clarridge JE, Bernard KA. Clinical microbiology of coryneform bacteria. *Clin Microbiol Rev* 1997; **10**: 125–59.
- 184 Manzella JP, Kellogg JA, Parsey KS. *Corynebacterium pseudodiphtheriticum*: a respiratory tract pathogen in adults. *Clin Infect Dis* 1995; **20**: 37–40.
- 185 Soriano F, Zapardiel J, Nieto E. Antimicrobial susceptibilities of *Corynebacterium* species and other non-spore-forming gram-positive bacilli to 18 antimicrobial agents. *Antimicrob Agents Chemother* 1995; **39**: 208–14.
- 186 Bittar F, Cassagne C, Bosdure E, et al. Outbreak of *Corynebacterium pseudodiphtheriticum* Infection in Cystic Fibrosis Patients, France. *Emerg Infect Dis* 2010; **16**: 1231–6.
- 187 Leonard RB, Nowowiejski DJ, Warren JJ, Finn DJ, Coyle MB. Molecular evidence of person-to-person transmission of a pigmented strain of *Corynebacterium striatum* in intensive care units. *J Clin Microbiol* 1994; **32**: 164–9.
- 188 Otsuka Y, Ohkusu K, Kawamura Y, Baba S, Ezaki T, Kimura S. Emergence of multidrug-resistant *Corynebacterium striatum* as a nosocomial pathogen in long-term hospitalized patients with underlying diseases. *Diagnostic Microbiology and Infectious Disease* 2006; **54**: 109–14.
- 189 Jefferies DJ, Hanson HM, Harris EA. The prevalence of *Pseudoterranova decipiens* (Nematoda) and *Corynosoma strumosum* (Acanthocephala) in otters *Lutra lutra* from coastal sites in Britain. *Journal of Zoology* 1990; **221**: 316–21.
- 190 Seshadri R, Paulsen IT, Eisen JA, et al. Complete genome sequence of the Q-fever pathogen *Coxiella burnetii*. *Proc Natl Acad Sci USA* 2003; **100**: 5455–60.
- 191 Maurin M, Raoult D. Q fever. *Clin Microbiol Rev* 1999; **12**: 518–53.
- 192 Mitchell TG, Perfect JR. Cryptococcosis in the era of AIDS—100 years after the discovery of *Cryptococcus neoformans*. *Clin Microbiol Rev* 1995; **8**: 515–48.
- 193 Xiao L. Molecular epidemiology of cryptosporidiosis: an update. *Exp Parasitol* 2010; **124**: 80–9.
- 194 Chalmers RM, Davies AP. Minireview: clinical cryptosporidiosis. *Exp Parasitol* 2010; **124**: 138–46.
- 195 Current WL, Garcia LS. Cryptosporidiosis. *Clin Microbiol Rev* 1991; **4**: 325–58.
- 196 Bibashi E, Sidi V, Kotsiou M, Makrigiannaki E, Kolioukas D. Pulmonary Zygomycosis caused by *Cunninghamella bertholletiae* in a child with acute lymphoblastic leukemia. *Hippokratia* 2008; **12**: 43–5.
- 197 Nityananda K, Sivasubramaniam P, Ajello L. A CASE OF MYCOTIC KERATITIS CAUSED BY CURVULARIA GENICULATA. *Arch Ophthalmol* 1964; **71**: 456–8.
- 198 Rinaldi MG, Phillips P, Schwartz JG, et al. Human *Curvularia* infections. Report of five cases and review of the literature. *Diagn Microbiol Infect Dis* 1987; **6**: 27–39.
- 199 Hasegawa H, Syafruddin null. *Cyclodontostomum purvisi* (syn. *Ancistronema coronatum*) (Nematoda: Strongyloidea: Chabertiidae) from rats of Kalimantan and Sulawesi, Indonesia. *J Parasitol* 1994; **80**: 657–60.
- 200 Bhaibulaya M, Indrangarm S. Man, an accidental host of *Cyclodontostomum purvisi* (Adams, 1933), and the occurrence in rats in Thailand. *Southeast Asian J Trop Med Public Health* 1975; **6**: 391–4.
- 201 Chaisiri K, Siribat P, Ribas A, Morand S. Potentially Zoonotic Helminthiases of Murid Rodents from the Indo-Chinese Peninsula: Impact of Habitat and the Risk of Human Infection. *Vector Borne Zoonotic Dis* 2015; **15**: 73–85.
- 202 Ortega YR, Sanchez R. Update on *Cyclospora cayentanensis*, a Food-Borne and Waterborne Parasite. *CMR* 2010; **23**: 218–34.

- 203 Zoutman DE, Sigler L. Mycetoma of the foot caused by *Cylindrocarpon destructans*. *J Clin Microbiol* 1991; **29**: 1855–9.
- 204 Britt W. Manifestations of human cytomegalovirus infection: proposed mechanisms of acute and chronic disease. *Curr Top Microbiol Immunol* 2008; **325**: 417–70.
- 205 Kawamura I, Yagi T, Hatakeyama K, *et al*. Recurrent vascular catheter-related bacteremia caused by *Delftia acidovorans* with different antimicrobial susceptibility profiles. *J Infect Chemother* 2011; **17**: 111–3.
- 206 Lee SM, Kim MK, Lee JL, Wee WR, Lee JH. Experience of *Comamonas Acidovorans* Keratitis with Delayed Onset and Treatment Response in Immunocompromised Cornea. *Korean Journal of Ophthalmology* 2008; **22**: 49–52.
- 207 Sodroski JG, Rosen CA, Haseltine WA. Trans-acting transcriptional activation of the long terminal repeat of human T lymphotropic viruses in infected cells. *Science* 1984; **225**: 381–5.
- 208 Cengiz ZT, Yilmaz H, Dulger AC, Cicek M. Human infection with *Dicrocoelium dendriticum* in Turkey. *Ann Saudi Med* 2010; **30**: 159–61.
- 209 Gonçalves MLC, Araújo A, Ferreira LF. Human intestinal parasites in the past: new findings and a review. *Memórias do Instituto Oswaldo Cruz* 2003; **98**: 103–18.
- 210 Skeríková A, Brabec J, Kuchta R, Jiménez JA, García HH, Scholz T. Is the human-infecting *Diphylobothrium pacificum* a valid species or just a South American population of the holarctic fish broad tapeworm, *D. latum*? *Am J Trop Med Hyg* 2006; **75**: 307–10.
- 211 Gutierrez Y, Catalaer M, Wicker D. Extrapulmonary *Dirofilaria immitis*-like Infections in the Western Hemisphere. *The American Journal of Surgical Pathology* 1996; **20**: 299–305.
- 212 Diaz JH, Risher WH. Risk factors for human heartworm infections (*dirofilariasis*) in the South. *J La State Med Soc* 2015; **167**: 79–86.
- 213 Reddy MV. Human *dirofilariasis*: An emerging zoonosis. *Trop Parasitol* 2013; **3**: 2–3.
- 214 Beguin H, Nolard N. Mould biodiversity in homes I. Air and surface analysis of 130 dwellings. *Aerobiologia* 1994; **10**: 157.
- 215 Ali-Shtayah MS, Salameh A-AM, Abu-Ghdeib S, Jamous RM. Hair and scalp mycobiota in school children in Nablus area. *Mycopathologia* 2001; **150**: 127–35.
- 216 Muller R, Muller R, Wakelin D. *Worms and human disease*, 2nd ed. Wallingford, Oxon, UK; New York: CABI, 2002.
- 217 Pourrut X, Kumulungui B, Wittmann T, *et al*. The natural history of Ebola virus in Africa. *Microbes and Infection* 2005; **7**: 1005–14.
- 218 Miranda MEG, Miranda NJ. Reston ebolavirus in humans and animals in the Philippines: a review. *J Infect Dis* 2011; **204 Suppl 3**: S757-760.
- 219 Chai J-Y. Echinostomes in humans. In: Toledo R, Fried B, eds. *The Biology of Echinostomes*. New York, NY: Springer New York, 2009: 147–83.
- 220 Lee SK, Chung NS, Ko IH, Ko HI, Sohn WM. [A case of natural human infection by *Echinostoma cinetorchis*]. *Kisaengchunghak Chapchi* 1988; **26**: 61–4.
- 221 Toledo R, Esteban JG. An update on human echinostomiasis. *Trans R Soc Trop Med Hyg* 2016; **110**: 37–45.
- 222 Cho C-M, Tak W-Y, Kweon Y-O, *et al*. A human case of *Echinostoma hortense* (Trematoda: Echinostomatidae) infection diagnosed by gastroduodenal endoscopy in Korea. *Korean J Parasitol* 2003; **41**: 117–20.
- 223 Lo CT. *Echinostoma macrorchis*: life history, population dynamics of intramolluscan stages, and the first and second intermediate hosts. *J Parasitol* 1995; **81**: 569–76.
- 224 Tangtrongchitr A, Monzon RB. Eating habits associated with *Echinostoma malayanum* infections in the Philippines. *Southeast Asian J Trop Med Public Health* 1991; **22 Suppl**: 212–6.
- 225 Chantima K, Chai J-Y, Wongsawad C. *Echinostoma revolutum*: freshwater snails as the second intermediate hosts in Chiang Mai, Thailand. *Korean J Parasitol* 2013; **51**: 183–9.
- 226 Grover M, Dutta R, Kumar R, Aneja S, Mehta G. *Echinostoma ilocanum* infection. *Indian Pediatr* 1998; **35**: 549–52.
- 227 Paddock CD, Childs JE. *Ehrlichia chaffeensis*: a Prototypical Emerging Pathogen. *CMR* 2003; **16**: 37–64.
- 228 Dumler JS, Asanovich KM, Bakken JS, Richter P, Kimsey R, Madigan JE. Serologic cross-reactions among *Ehrlichia equi*, *Ehrlichia phagocytophila*, and human granulocytic *Ehrlichia*. *Journal of Clinical Microbiology* 1995; **33**: 1098–103.
- 229 Dumler JS, Walker DH. Tick-borne ehrlichioses. *The Lancet Infectious Diseases* 2001; **1**: 21–8.
- 230 Emmons CW, Jellison WL. *Emmonsia crescens* sp. n. and *adiaspiromycosis* (haplomycosis) in mammals. *Ann N Y Acad Sci* 1960; **89**: 91–101.

- 231 Anstead GM, Sutton DA, Graybill JR. Adiaspiromycosis Causing Respiratory Failure and a Review of Human Infections Due to *Emmonsia* and *Chrysosporium* spp. *J Clin Microbiol* 2012; **50**: 1346–54.
- 232 Weber R, Kuster H, Visvesvara GS, Bryan RT, Schwartz DA, Lüthy R. Disseminated Microsporidiosis Due to *Encephalitozoon hellem*: Pulmonary Colonization, Microhematuria, and Mild Conjunctivitis in a Patient with AIDS. *Clin Infect Dis* 1993; **17**: 415–9.
- 233 Didier ES, Weiss LM. Microsporidiosis: not just in AIDS patients. *Curr Opin Infect Dis* 2011; **24**: 490–5.
- 234 Valencakova A, Balent P, Ravaszova P, et al. Molecular identification and genotyping of Microsporidia in selected hosts. *Parasitol Res* 2012; **110**: 689–93.
- 235 Loftus B, Anderson I, Davies R, et al. The genome of the protist parasite *Entamoeba histolytica*. *Nature* 2005; **433**: 865–8.
- 236 Westerfeld C, Papaliodis GN, Behlau I, Durand ML, Sobrin L. *Enterobacter amnigenus* endophthalmitis. *Retin Cases Brief Rep* 2009; **3**: 409–11.
- 237 Mezzatesta ML, Gona F, Stefani S. *Enterobacter cloacae* complex: clinical impact and emerging antibiotic resistance. *Future Microbiol* 2012; **7**: 887–902.
- 238 Cook GC. *Enterobius vermicularis* infection. *Gut* 1994; **35**: 1159–62.
- 239 Byappanahalli MN, Nevers MB, Korajkic A, Staley ZR, Harwood VJ. Enterococci in the Environment. *Microbiol Mol Biol Rev* 2012; **76**: 685–706.
- 240 Morrison D, Woodford N, Cookson B. Enterococci as emerging pathogens of humans. *Journal of Applied Microbiology* 1997; **83**: 89S-99S.
- 241 Boyce JM. VANCOMYCIN-RESISTANT ENTEROCOCCUS: Detection, Epidemiology, and Control Measures. *Infectious Disease Clinics of North America* 1997; **11**: 367–84.
- 242 Dowd SE, Gerba CP, Pepper IL. Confirmation of the Human-Pathogenic Microsporidia *Enterocytozoon bienewsi*, *Encephalitozoon intestinalis*, and *Vittaforma corneae* in Water. *Appl Environ Microbiol* 1998; **64**: 3332–5.
- 243 Kee F, McElroy G, Stewart D, Coyle P, Watson J. A community outbreak of echovirus infection associated with an outdoor swimming pool. *J Public Health (Oxf)* 1994; **16**: 145–8.
- 244 Kramer M, Schulte BM, Toonen LWJ, et al. Echovirus infection causes rapid loss-of-function and cell death in human dendritic cells. *Cell Microbiol* 2007; **9**: 1507–18.
- 245 Hall CB, Cherry JD, Hatch MH, Nelson DB, Winter HS. The Return of Boston Exanthem: Echovirus 16 Infections in 1974. *Am J Dis Child* 1977; **131**: 323–6.
- 246 Zhang Y, Tan X-J, Wang H-Y, et al. An outbreak of hand, foot, and mouth disease associated with subgenotype C4 of human enterovirus 71 in Shandong, China. *Journal of Clinical Virology* 2009; **44**: 262–7.
- 247 Mauleekoonphairoj J, Puenpa J, Korkong S, Vongpunsawad S, Poovorawan Y. PREVALENCE OF HUMAN ENTEROVIRUS AMONG PATIENTS WITH HAND, FOOT, AND MOUTH DISEASE AND HERPANGINA IN THAILAND, 2013. *Southeast Asian J Trop Med Public Health* 2015; **46**: 1013–20.
- 248 Dowdle WR, Birmingham ME. The Biologic Principles of Poliovirus Eradication. *Journal of Infectious Diseases* 1997; **175**: S286–92.
- 249 Aly R. Ecology and epidemiology of dermatophyte infections. *J Am Acad Dermatol* 1994; **31**: S21-25.
- 250 Brooke CJ, Riley TV. *Erysipelothrix rhusiopathiae*: bacteriology, epidemiology and clinical manifestations of an occupational pathogen. *J Med Microbiol* 1999; **48**: 789–99.
- 251 Reboli AC, Farrar WE. *Erysipelothrix rhusiopathiae*: an occupational pathogen. *Clin Microbiol Rev* 1989; **2**: 354–9.
- 252 Caprioli A, Morabito S, Brugère H, Oswald E. Enterohaemorrhagic *Escherichia coli*: emerging issues on virulence and modes of transmission. *Vet Res* 2005; **36**: 289–311.
- 253 Solomon EB, Yaron S, Matthews KR. Transmission of *Escherichia coli* O157:H7 from Contaminated Manure and Irrigation Water to Lettuce Plant Tissue and Its Subsequent Internalization. *AEM* 2002; **68**: 397–400.
- 254 Hill GB, Ayers OM, Kohan AP. Characteristics and sites of infection of *Eubacterium nodatum*, *Eubacterium timidum*, *Eubacterium brachy*, and other asaccharolytic eubacteria. *J Clin Microbiol* 1987; **25**: 1540–5.
- 255 Rochford JC. Pleuropulmonary infection associated with *Eubacterium brachy*, a new species of *Eubacterium*. *J Clin Microbiol* 1980; **12**: 722–3.
- 256 Finegold SM, Sutter VL. Fecal flora in different populations, with special reference to diet. *Am J Clin Nutr* 1978; **31**: S116–22.
- 257 Schwierz A, Le Blay G, Blaut M. Quantification of different *Eubacterium* spp. in human fecal samples with species-specific 16S rRNA-targeted oligonucleotide probes. *Appl Environ Microbiol* 2000; **66**: 375–82.

- 258 Rimawi BH, Rimawi RH, Mirdamadi M, *et al.* A case of Exophiala oligosperma successfully treated with voriconazole. *Medical Mycology Case Reports* 2013; **2**: 144–7.
- 259 Al-Obaid I, Ahmad S, Khan ZU, Dinesh B, Hejab HM. Catheter-associated fungemia due to Exophiala oligosperma in a leukemic child and review of fungemia cases caused by Exophiala species. *European Journal of Clinical Microbiology & Infectious Diseases* 2006; **25**: 729–32.
- 260 Wang L, Yokoyama K, Miyaji M, Nishimura K. Identification, Classification, and Phylogeny of the Pathogenic Species Exophiala jeanselmei and Related Species by Mitochondrial Cytochrome b Gene Analysis. *J Clin Microbiol* 2001; **39**: 4462–7.
- 261 Nucci M, Akiti T, Barreiros G, *et al.* Nosocomial outbreak of Exophiala jeanselmei fungemia associated with contamination of hospital water. *Clin Infect Dis* 2002; **34**: 1475–80.
- 262 Phalee A, Wongsawad C, Rojanapaibul A, Chai J-Y. Experimental life history and biological characteristics of Fasciola gigantica (Digenea: Fasciolidae). *Korean J Parasitol* 2015; **53**: 59–64.
- 263 Graczyk TK, Gilman RH, Fried B. Fasciolopsiasis: is it a controllable food-borne disease? *Parasitol Res* 2001; **87**: 80–3.
- 264 Montgomery L, Flesher B, Stahl D. Transfer of Bacteroides succinogenes (Hungate) to Fibrobacter gen. nov. as Fibrobacter succinogenes comb. nov. and Description of Fibrobacter intestinalis sp. nov. *International Journal of Systematic Bacteriology* 1988; **38**: 430–5.
- 265 Bogovic P, Strle F. Tick-borne encephalitis: A review of epidemiology, clinical characteristics, and management. *World J Clin Cases* 2015; **3**: 430–41.
- 266 Thomas SJ, Strickman D, Vaughn DW. Dengue Epidemiology: Virus Epidemiology, Ecology, and Emergence. In: Chambers TJ, Monath TP, eds. *Advances in Virus Research*. Academic Press, 2003: 235–89.
- 267 Kautner I, Robinson MJ, Kuhnle U. Dengue virus infection: Epidemiology, pathogenesis, clinical presentation, diagnosis, and prevention. *The Journal of Pediatrics* 1997; **131**: 516–24.
- 268 Diaz JH. Emerging Tickborne Viral Infections: What Wilderness Medicine Providers Need to Know. *Wilderness & Environmental Medicine* 2020; **31**: 489–97.
- 269 Mackenzie JS, Gubler DJ, Petersen LR. Emerging flaviviruses: the spread and resurgence of Japanese encephalitis, West Nile and dengue viruses. *Nat Med* 2004; **10**: S98–109.
- 270 Scherret JH, Poidinger M, Mackenzie JS, *et al.* The relationships between West Nile and Kunjin viruses. *Emerg Infect Dis* 2001; **7**: 697–705.
- 271 Holbrook MR. Kyasanur forest disease. *Antiviral Research* 2012; **96**: 353–62.
- 272 Davidson MM, Williams H, Macleod JA. Louping ill in man: a forgotten disease. *J Infect* 1991; **23**: 241–9.
- 273 Hudson PJ, Norman R, Laurenson MK, *et al.* Persistence and transmission of tick-borne viruses: Ixodes ricinus and louping-ill virus in red grouse populations. *Parasitology* 1995; **111**: S49–58.
- 274 Selvey LA, Dailey L, Lindsay M, *et al.* The changing epidemiology of Murray Valley encephalitis in Australia: the 2011 outbreak and a review of the literature. *PLoS Negl Trop Dis* 2014; **8**: e2656.
- 275 Růžek D, Yakimenko VV, Karan LS, Tkachev SE. Omsk haemorrhagic fever. *The Lancet* 2010; **376**: 2104–13.
- 276 Anderson JF, Armstrong PM. Prevalence and genetic characterization of Powassan virus strains infecting Ixodes scapularis in Connecticut. *Am J Trop Med Hyg* 2012; **87**: 754–9.
- 277 Medeiros DBA, Nunes MRT, Vasconcelos PFC, Chang G-JJ, Kuno G. Complete genome characterization of Rocio virus (Flavivirus: Flaviviridae), a Brazilian flavivirus isolated from a fatal case of encephalitis during an epidemic in São Paulo state. *Journal of General Virology*, 2007; **88**: 2237–46.
- 278 Thomas SJ, Endy TP, Rothman AL, Barrett AD. Flaviviruses (Dengue, Yellow Fever, Japanese Encephalitis, West Nile Encephalitis, St. Louis Encephalitis, Tick-Borne Encephalitis, Kyasanur Forest Disease, Alkhurma Hemorrhagic Fever, Zika). In: Mandell, Douglas, and Bennett's Principles and Practice of Infectious Diseases. Elsevier, 2015: 1881-1903.e6.
- 279 Rossi SL, Ross TM, Evans JD. West Nile virus. *Clin Lab Med* 2010; **30**: 47–65.
- 280 Monath TP. Yellow fever: an update. *Lancet Infect Dis* 2001; **1**: 11–20.
- 281 Vickers RM, Yu VL. Clinical laboratory differentiation of Legionellaceae family members with pigment production and fluorescence on media supplemented with aromatic substrates. *J Clin Microbiol* 1984; **19**: 583–7.
- 282 Brown A, Garrity GM, Vickers RM. Fluoribacter dumoffii (Brenner *et al.*) comb. nov. and Fluoribacter gormanii (Morris *et al.*) comb. nov. *International Journal of Systematic Bacteriology* 1981; **31**: 111–5.
- 283 Sharma NL, Sharma RC, Grover PS, Gupta ML, Sharma AK, Mahajan VK. Chromoblastomycosis in India. *Int J Dermatol* 1999; **38**: 846–51.



- 284 Chaidaroon W, Tananuvat N, Chavengsakongkram P, Vanittanakom N. Corneal Chromoblastomycosis Caused by *Fonsecaea pedrosoi*. *Case Rep Ophthalmol* 2015; **6**: 82–7.
- 285 Keim P, Johansson A, Wagner DM. Molecular epidemiology, evolution, and ecology of *Francisella*. *Ann N Y Acad Sci* 2007; **1105**: 30–66.
- 286 Santic M, Al-Khodor S, Abu Kwaik Y. Cell biology and molecular ecology of *Francisella tularensis*. *Cell Microbiol* 2010; **12**: 129–39.
- 287 Larsson P, Oyston PCF, Chain P, *et al.* The complete genome sequence of *Francisella tularensis*, the causative agent of tularemia. *Nat Genet* 2005; **37**: 153–9.
- 288 Zhang S, Ahearn DG, Noble-Wang JA, *et al.* Growth and Survival of *Fusarium solani*-*F. oxysporum* Complex on Stressed Multipurpose Contact Lens Care Solution Films on Plastic Surfaces In Situ and In Vitro. *Cornea* 2006; **25**: 1210–6.
- 289 Godoy P, Cano J, Gené J, Guarro J, Höfling-Lima AL, Lopes Colombo A. Genotyping of 44 Isolates of *Fusarium solani*, the Main Agent of Fungal Keratitis in Brazil. *J Clin Microbiol* 2004; **42**: 4494–7.
- 290 Prout J, Glymph R. Anaerobic septicemia secondary to *Fusobacterium mortiferum*. *J Natl Med Assoc* 1986; **78**: 334, 337.
- 291 Catlin BW. *Gardnerella vaginalis*: characteristics, clinical considerations, and controversies. *Clin Microbiol Rev* 1992; **5**: 213–37.
- 292 Uzairue L, Ugbor C, Ezeah G, Eze N, Nwadike I. *Gastrodiscoides hominis* Infestation on Vegetables (Cabbages) Sold in Ekpoma Markets, Edo State, Southern Nigeria- A Case Report. *International Journal of Basic, Applied and Innovative Research*; **2**: 37–9.
- 293 Kassamali H, Anaissie E, Ro J, *et al.* Disseminated *Geotrichum candidum* infection. *Journal of Clinical Microbiology* 1987; **25**: 1782–3.
- 294 Sfakianakis A, Krasagakis K, Stefanidou M, *et al.* Invasive cutaneous infection with *Geotrichum candidum* – sequential treatment with amphotericin B and voriconazole. *Med Mycol* 2007; **45**: 81–4.
- 295 Faubert G. Immune response to *Giardia duodenalis*. *Clin Microbiol Rev* 2000; **13**: 35–54, table of contents.
- 296 Nawa Y. Historical review and current status of gnathostomiasis in Asia. *Southeast Asian J Trop Med Public Health* 1991; **22 Suppl**: 217–9.
- 297 Nawa Y, Imai J, Ogata K, Otsuka K. The First Record of a Confirmed Human Case of *Gnathostoma doloresi* Infection. *The Journal of Parasitology* 1989; **75**: 166–9.
- 298 Prommas C, Daengsvang S. Further Report of a Study on the Life Cycle of *Gnathostoma spinigerum*. *The Journal of Parasitology* 1936; **22**: 180–6.
- 299 Punyagupta S, Bunnag T, Juttijudata P. Eosinophilic meningitis in Thailand. Clinical and epidemiological characteristics of 162 patients with myeloencephalitis probably caused by *Gnathostoma spinigerum*. *J Neurol Sci* 1990; **96**: 241–56.
- 300 Wilde H, Suankratay C, Thongkam C, Chaiyabutr N. Human *Gongylonema* Infection in Southeast Asia. *J Travel Med* 2001; **8**: 204–6.
- 301 Blanc V, Dalle M, Markarian A, *et al.* *Gordonia terrae*: a Difficult-To-Diagnose Emerging Pathogen? *J Clin Microbiol* 2007; **45**: 1076–7.
- 302 Price T, Edwards L. *Haemophilus aphrophilus* endocarditis. *J Okla State Med Assoc* 1984; **77**: 387–9.
- 303 Batshon BA, Brosius OC. A case of cerebral abscess with *haemophilus aphrophilus* cultured from spinal fluid. *Am J Clin Pathol* 1969; **52**: 356–7.
- 304 Bieger RC, Brewer NS, Washington JA. *Haemophilus aphrophilus*: a microbiologic and clinical review and report of 42 cases. *Medicine (Baltimore)* 1978; **57**: 345–55.
- 305 Lewis DA. Chancroid: clinical manifestations, diagnosis, and management. *Sex Transm Infect* 2003; **79**: 68–71.
- 306 Morse SA. Chancroid and *Haemophilus ducreyi*. *Clin Microbiol Rev* 1989; **2**: 137–57.
- 307 Makintubee S, Istre GR, Ward JI. Transmission of invasive *Haemophilus influenzae* type b disease in day care settings. *The Journal of Pediatrics* 1987; **111**: 180–6.
- 308 Martinez VP, Bellomo C, San Juan J, *et al.* Person-to-person transmission of Andes virus. *Emerging Infect Dis* 2005; **11**: 1848–53.
- 309 Lundkvist A, Hukic M, Hörling J, Gilljam M, Nichol S, Niklasson B. Puumala and Dobrava viruses cause hemorrhagic fever with renal syndrome in Bosnia-Herzegovina: evidence of highly cross-neutralizing antibody responses in early patient sera. *J Med Virol* 1997; **53**: 51–9.
- 310 Lee HW, Baek LJ, Johnson KM. Isolation of Hantaan Virus, the Etiologic Agent of Korean Hemorrhagic Fever, from Wild Urban Rats. *The Journal of Infectious Diseases* 1982; **146**: 638–44.
- 311 Goldsmith CS, Elliott LH, Peters CJ, Zaki SR. Ultrastructural characteristics of Sin Nombre virus, causative agent of hantavirus pulmonary syndrome. *Archives of Virology* 1995; **140**: 2107–22.

- 312 Miliotis M. International Handbook of Foodborne Pathogens. CRC Press. <https://www.crcpress.com/International-Handbook-of-Foodborne-Pathogens/Miliotis-Bier/p/book/9780824706852> (accessed March 21, 2020).
- 313 Suerbaum S, Michetti P. Helicobacter pylori infection. *N Engl J Med* 2002; **347**: 1175–86.
- 314 Salmanian A-H, Siavoshi F, Akbari F, Afshari A, Malekzadeh R. Yeast of the oral cavity is the reservoir of Helicobacter pylori: Oral yeast is the reservoir of H. pylori. *Journal of Oral Pathology & Medicine* 2008; **37**: 324–8.
- 315 Lima LR, Almeida AJD, Tourinho R dos S, Hasselmann B, Lewis Ximenez LL, De Paula VS. Evidence of Hepatitis A Virus Person-to-Person Transmission in Household Outbreaks. *PLoS ONE* 2014; **9**: e102925.
- 316 Chai JY, Seo BS, Lee SH, Hong SJ, Sohn WM. Human infections by Heterophyes heterophyes and H. dispar imported from Saudi Arabia. *Korean J Parasitol* 1986; **24**: 82.
- 317 Park J-H, Kim J-L, Shin E-H, Guk S-M, Park Y-K, Chai J-Y. A new endemic focus of Heterophyes nocens and other heterophyid infections in a coastal area of Gangjin-gun, Jeollanam-do. *Korean J Parasitol* 2007; **45**: 33.
- 318 Mas-Coma S, Bargues MD, Valero MA. Fascioliasis and other plant-borne trematode zoonoses. *Int J Parasitol* 2005; **35**: 1255–78.
- 319 Kauffman CA. Histoplasmosis: a clinical and laboratory update. *Clin Microbiol Rev* 2007; **20**: 115–32.
- 320 Bonifaz A, Badali H, de Hoog GS, et al. Tinea nigra by Hortaea werneckii, a report of 22 cases from Mexico. *Studies in Mycology* 2008; **61**: 77–82.
- 321 Kim MJ, Kim WH, Jung H-C, Chai J-W, Chai J-Y. Isospora belli Infection with Chronic Diarrhea in an Alcoholic Patient. *Korean J Parasitol* 2013; **51**: 207–12.
- 322 Lindsay DS, Dubey JP, Blagburn BL. Biology of Isospora spp. from humans, nonhuman primates, and domestic animals. *Clin Microbiol Rev* 1997; **10**: 19–34.
- 323 Lindsay DS, Dubey JP, Butler JM, Blagburn BL. Mechanical transmission of Toxoplasma gondii oocysts by dogs. *Vet Parasitol* 1997; **73**: 27–33.
- 324 Richens J. The diagnosis and treatment of donovanosis (granuloma inguinale). *Sexually Transmitted Infections* 1991; **67**: 441–52.
- 325 O'Farrell N. Donovanosis. *Sex Transm Infect* 2002; **78**: 452–7.
- 326 Lowe C, Willey B, O'Shaughnessy A, et al. Outbreak of Extended-Spectrum  $\beta$ -Lactamase-producing Klebsiella oxytoca Infections Associated with Contaminated Handwashing Sinks. *Emerg Infect Dis* 2012; **18**: 1242–7.
- 327 Nordmann P, Cuzon G, Naas T. The real threat of Klebsiella pneumoniae carbapenemase-producing bacteria. *Lancet Infect Dis* 2009; **9**: 228–36.
- 328 Taborda PR, Taborda VA, McGinnis MR. Lacazia loboi gen. nov., comb. nov., the etiologic agent of lobomycosis. *J Clin Microbiol* 1999; **37**: 2031–3.
- 329 Elsayed S, Kuhn SM, Barber D, Church DL, Adams S, Kasper R. Human Case of Lobomycosis. *Emerg Infect Dis* 2004; **10**: 715–8.
- 330 Mull N, Jackson R, Sironen T, Forbes KM. Ecology of Neglected Rodent-Borne American Orthohantaviruses. *Pathogens* 2020; **9**: 325.
- 331 Gubler JGH, Schorr M, Gaia V, Zbinden R, Altwegg M. Recurrent Soft Tissue Abscesses Caused by Legionella cincinnatiensis. *J Clin Microbiol* 2001; **39**: 4568–70.
- 332 Thacker WL, Dyke JW, Benson RF, et al. Legionella lansingensis sp. nov. isolated from a patient with pneumonia and underlying chronic lymphocytic leukemia. *J Clin Microbiol* 1992; **30**: 2398–401.
- 333 Tang PW, Toma S, MacMillan LG. Legionella oakridgensis: laboratory diagnosis of a human infection. *J Clin Microbiol* 1985; **21**: 462–3.
- 334 Fields BS, Benson RF, Besser RE. Legionella and Legionnaires' disease: 25 years of investigation. *Clin Microbiol Rev* 2002; **15**: 506–26.
- 335 Muder RR, Yu VL, Woo AH. Mode of transmission of Legionella pneumophila. A critical review. *Arch Intern Med* 1986; **146**: 1607–12.
- 336 Pearson RD, Sousa AQ. Clinical spectrum of Leishmaniasis. *Clin Infect Dis* 1996; **22**: 1–13.
- 337 Alvar J, Vélez ID, Bern C, et al. Leishmaniasis worldwide and global estimates of its incidence. *PLoS ONE* 2012; **7**: e35671.
- 338 Reithinger R. Cutaneous leishmaniasis. 2017; **7**. [http://antimicrobe.org/h04c.files/history/LancetID\\_Reithinger\\_Cutaneous%20Leishmaniasis\\_2007.pdf](http://antimicrobe.org/h04c.files/history/LancetID_Reithinger_Cutaneous%20Leishmaniasis_2007.pdf) (accessed March 21, 2020).
- 339 Pratloug F, Deniau M, Darie H, et al. Human cutaneous leishmaniasis caused by Leishmania naiffi is wide-spread in South America. *Ann Trop Med Parasitol* 2002; **96**: 781–5.

- 340 Bonfante-Garrido R, Meléndez E, Barroeta S, *et al.* Cutaneous leishmaniasis in western Venezuela caused by infection with *Leishmania venezuelensis* and *L. braziliensis* variants. *Transactions of the Royal Society of Tropical Medicine and Hygiene* 1992; **86**: 141–8.
- 341 Shaw JJ. New World Leishmaniasis: The Ecology of Leishmaniasis and the Diversity of Leishmanial Species in Central and South America. In: Farrell JP, ed. *Leishmania*. Boston, MA: Springer US, 2002: 11–31.
- 342 Gramiccia M, Gradoni L. The current status of zoonotic leishmaniases and approaches to disease control. *Int J Parasitol* 2005; **35**: 1169–80.
- 343 Levy JA. Pathogenesis of human immunodeficiency virus infection. *Microbiol Rev* 1993; **57**: 183–289.
- 344 Khatri ML, Al-Halali HM, Khalid MF, Saif SA, Vyas MCR. Mycetoma in Yemen: clinicoepidemiologic and histopathologic study. *International Journal of Dermatology* 2002; **41**: 586–93.
- 345 El-Ani AS. A New Species of *Leptosphaeria*, an Etiologic Agent of Mycetoma. *Mycologia* 1966; **58**: 406–11.
- 346 Bharti AR, Nally JE, Ricaldi JN, *et al.* Leptospirosis: a zoonotic disease of global importance. *The Lancet Infectious Diseases* 2003; **3**: 757–71.
- 347 Slack AT, Symonds ML, Dohnt MF, Smythe LD. The epidemiology of leptospirosis and the emergence of *Leptospira borgpetersenii* serovar Arborea in Queensland, Australia, 1998–2004. *Epidemiology & Infection* 2006; **134**: 1217–25.
- 348 Bulach DM, Zuerner RL, Wilson P, *et al.* Genome reduction in *Leptospira borgpetersenii* reflects limited transmission potential. *PNAS* 2006; **103**: 14560–5.
- 349 Matsunaga J, Lo M, Bulach DM, Zuerner RL, Adler B, Haake DA. Response of *Leptospira interrogans* to Physiologic Osmolarity: Relevance in Signaling the Environment-to-Host Transition. *Infect Immun* 2007; **75**: 2864–74.
- 350 de Faria MT, Calderwood MS, Athanazio DA, *et al.* Carriage of *Leptospira interrogans* among domestic rats from an urban setting highly endemic for leptospirosis in Brazil. *Acta Trop* 2008; **108**: 1–5.
- 351 Chadsuthi S, Bicout DJ, Wiratsudakul A, *et al.* Investigation on predominant *Leptospira* serovars and its distribution in humans and livestock in Thailand, 2010-2015. *PLOS Neglected Tropical Diseases* 2017; **11**: e0005228.
- 352 Chou L-F, Chen T-W, Ko Y-C, *et al.* Potential impact on kidney infection: a whole-genome analysis of *Leptospira santarosai* serovar Shermani. *Emerging Microbes & Infections* 2014; **3**: 1–11.
- 353 Hsieh W-J, Pan M-J. Identification *Leptospira santarosai* serovar shermani specific sequences by suppression subtractive hybridization. *FEMS Microbiol Lett* 2004; **235**: 117–24.
- 354 Farber JM, Peterkin PI. *Listeria monocytogenes*, a food-borne pathogen. *Microbiol Rev* 1991; **55**: 476–511.
- 355 Nufer U, Stephan R, Tasara T. Growth characteristics of *Listeria monocytogenes*, *Listeria welshimeri* and *Listeria innocua* strains in broth cultures and a sliced bologna-type product at 4 and 7 degrees C. *Food Microbiol* 2007; **24**: 444–51.
- 356 Andre P, Genicot A. [First isolation of *Listeria welshimeri* in a human]. *Zentralbl Bakteriol Mikrobiol Hyg A* 1987; **263**: 605–6.
- 357 Straus SE. Epstein-Barr Virus Infections: Biology, Pathogenesis, and Management. *Ann Intern Med* 1993; **118**: 45.
- 358 Kgaladi J, Wright N, Coertse J, *et al.* Diversity and epidemiology of Mokola virus. *PLoS Negl Trop Dis* 2013; **7**: e2511.
- 359 Dyer JL, Yager P, Orciari L, *et al.* Rabies surveillance in the United States during 2013. *J Am Vet Med Assoc* 2014; **245**: 1111–23.
- 360 Ahmed AOA, van Leeuwen W, Fahal A, van de Sande W, Verbrugh H, van Belkum A. Mycetoma caused by *Madurella mycetomatis*: a neglected infectious burden. *Lancet Infect Dis* 2004; **4**: 566–74.
- 361 Estrada R, Chávez-López G, Estrada-Chávez G, López-Martínez R, Welsh O. Eumycetoma. *Clinics in Dermatology* 2012; **30**: 389–96.
- 362 Guého E, Boekhout T, Ashbee HR, Guillot J, Van Belkum A, Faergemann J. The role of *Malassezia* species in the ecology of human skin and as pathogens. *Med Mycol* 1998; **36 Suppl 1**: 220–9.
- 363 Crespo Erchiga V, Ojeda Martos AA, Vera Casaño A, Crespo Erchiga A, Sánchez Fajardo F. [Isolation and identification of *Malassezia* spp. In pityriasis versicolor, seborrheic dermatitis and healthy skin.]. *Rev Iberoam Micol* 1999; **16**: S16-21.
- 364 Belkum A van, Boekhout T, Bosboom R. Monitoring spread of *Malassezia* infections in a neonatal intensive care unit by PCR-mediated genetic typing. *Journal of Clinical Microbiology* 1994; **32**: 2528–32.
- 365 Bonthuis DJ. Lymphocytic choriomeningitis virus: an underrecognized cause of neurologic disease in the fetus, child, and adult. *Semin Pediatr Neurol* 2012; **19**: 89–95.
- 366 Smith DH, Johnson BK, Isaacson M, *et al.* Marburg-virus disease in Kenya. *Lancet* 1982; **1**: 816–20.

- 367 Zehender G, Sorrentino C, Veo C, *et al.* Distribution of Marburg virus in Africa: An evolutionary approach. *Infect Genet Evol* 2016; **44**: 8–16.
- 368 Borkenhagen LK, Fieldhouse JK, Seto D, Gray GC. Are adenoviruses zoonotic? A systematic review of the evidence. *Emerging Microbes & Infections* 2019; **8**: 1679–87.
- 369 Desheva Y. Introductory Chapter: Human Adenoviruses. In: Desheva Y, ed. Adenoviruses. IntechOpen, 2019. DOI:10.5772/intechopen.82554.
- 370 Nama HS, Parihar A. Quantitative and qualitative analysis of helminth fauna in *Rattus rattus rufescens*. *J Helminthol* 1976; **50**: 99–102.
- 371 Lamou C, Greer GJ. Human infection with an anoplocephalid tapeworm of the genus *Mathevotaenia*. *Am J Trop Med Hyg* 1986; **35**: 824–6.
- 372 Fernando ST. Morphology, Systematics, and Geographic Distribution of *Mecistocirrus digitatus*, a Trichostrongylid Parasite of Ruminants. *The Journal of Parasitology* 1965; **51**: 149–55.
- 373 Van Aken D, Verduyck J, Dargantes A, Lagapa J, Shaw DJ. Epidemiology of *Mecistocirrus digitatus* and other gastrointestinal nematode infections in cattle in Mindanao, Philippines. *Veterinary Parasitology* 1998; **74**: 29–41.
- 374 Esper F, Boucher D, Weibel C, Martinello RA, Kahn JS. Human metapneumovirus infection in the United States: clinical manifestations associated with a newly emerging respiratory infection in children. *Pediatrics* 2003; **111**: 1407–10.
- 375 MacLean JD, Ward BJ, Kokoskin E, Arthur JR, Gyorkos TW, Curtis MA. Common-source outbreak of acute infection due to the North American liver fluke *Metorchis conjunctus*. *The Lancet* 1996; **347**: 154–8.
- 376 Sandoval-Denis M, Gené J, Sutton DA, *et al.* Redefining *Microascus*, *Scopulariopsis* and allied genera. *Persoonia* 2016; **36**: 1–36.
- 377 Miossec C, Morio F, Lepoivre T, *et al.* Fatal invasive infection with fungemia due to *Microascus cirrosus* after heart and lung transplantation in a patient with cystic fibrosis. *J Clin Microbiol* 2011; **49**: 2743–7.
- 378 Onyiche TE, Okute TO, Oseni OS, Okoro DO, Biu AA, Mbaya AW. Parasitic and zoonotic meningoencephalitis in humans and equids: Current knowledge and the role of *Halicephalobus gingivalis*. *Parasite Epidemiology and Control* 2018; **3**: 36–42.
- 379 Kane J, Padhye AA, Ajello L. *Microsporium equinum* in North America. *J Clin Microbiol* 1982; **16**: 943–7.
- 380 Onsberg P. Human infections with *Microsporium persicolor* in Denmark. *Br J Dermatol* 1978; **99**: 531–6.
- 381 Allen DE, Snyderman R, Meadows L, Pinnell SR. Generalized *Microsporium audouinii* infection and depressed cellular immunity associated with a missing plasma factor required for lymphocyte blastogenesis. *The American Journal of Medicine* 1977; **63**: 991–1000.
- 382 Arenas R, Torres E, Amaya M, *et al.* Emergence of *Microsporium audouinii* and *Trichophyton tonsurans* as Causative Organisms of Tinea Capitis in the Dominican Republic. *Actas Dermo-Sifiliográficas (English Edition)* 2010; **101**: 330–5.
- 383 Sherwani S, Farleigh L, Agarwal N, *et al.* Seroprevalence of *Molluscum contagiosum* Virus in German and UK Populations. *PLoS ONE* 2014; **9**: e88734.
- 384 Karshima SN, Maikai B-V, Kwaga JKP. Helminths of veterinary and zoonotic importance in Nigerian ruminants: a 46-year meta-analysis (1970–2016) of their prevalence and distribution. *Infect Dis Poverty* 2018; **7**: 52.
- 385 McKenzie RA, Connole MD, McGinnis MR, Lepelaar R. Subcutaneous phaeohyphomycosis caused by *Moniliella suaveolens* in two cats. *Vet Pathol* 1984; **21**: 582–6.
- 386 Kodjo A, Richard Y, Tønjum T. *Moraxella boevrei* sp. nov., a new *Moraxella* species found in goats. *Int J Syst Bacteriol* 1997; **47**: 115–21.
- 387 Queen CW, Ward ACS, Hunter DL. BACTERIA ISOLATED FROM NASAL AND TONSILLAR SAMPLES OF CLINICALLY HEALTHY ROCKY MOUNTAIN BIGHORN AND DOMESTIC SHEEP. In: *Journal of wildlife diseases*. 1994. DOI:10.7589/0090-3558-30.1.1.
- 388 Christensen JJ, Renneberg J, Bruun B, Forsgren A. Serum antibody response to proteins of *Moraxella* (*Branhamella*) *catarrhalis* in patients with lower respiratory tract infection. *Clin Diagn Lab Immunol* 1995; **2**: 14–7.
- 389 Laksono B, de Vries R, McQuaid S, Duprex W, de Swart R. Measles Virus Host Invasion and Pathogenesis. *Viruses* 2016; **8**: 210.
- 390 Chandra S, Woodgyer A. Primary cutaneous zygomycosis due to *Mucor circinelloides*. *Australasian Journal of Dermatology* 2002; **43**: 39–42.
- 391 Karimi K, Zamani A. *Mucor indicus*: Biology and industrial application perspectives: A review. *Biotechnology Advances* 2013; **31**: 466–81.
- 392 Prevoo RLMA, Starink TM, Haan P de. Primary cutaneous mucormycosis in a healthy young girl: Report of a case caused by *Mucor hiemalis* Wehmer. *Journal of the American Academy of Dermatology* 1991; **24**: 882–5.
- 393 Webman RB, Gilman RH. 132 - Coenuriasis. In: Magill AJ, Hill DR, Solomon T, Ryan ET, eds. *Hunter's Tropical Medicine and Emerging Infectious Disease (Ninth Edition)*. London: W.B. Saunders, 2013: 921–2.

- 394 Bourbeau P, McGough DA, Fraser H, Shah N, Rinaldi MG. Fatal disseminated infection caused by *Myceliophthora thermophila*, a new agent of mycosis: case history and laboratory characteristics. *J Clin Microbiol* 1992; **30**: 3019–23.
- 395 Aitken ML, Limaye A, Pottinger P, et al. Respiratory outbreak of *Mycobacterium abscessus* subspecies *massiliense* in a lung transplant and cystic fibrosis center. *Am J Respir Crit Care Med* 2012; **185**: 231–2.
- 396 Moore M, Frerichs JB. An unusual acid-fast infection of the knee with subcutaneous, abscess-like lesions of the gluteal region; report of a case with a study of the organism, *Mycobacterium abscessus*, n. sp. *J Invest Dermatol* 1953; **20**: 133–69.
- 397 Villanueva A, Villanueva Calderon R, Acosta Vargas B, et al. Report on an Outbreak of Postinjection Abscesses Due to *Mycobacterium abscessus*, Including Management with Surgery and Clarithromycin Therapy and Comparison of Strains by Random Amplified Polymorphic DNA Polymerase Chain Reaction. *Clin Infect Dis* 1997; **24**: 1147–53.
- 398 Taylor LQ, Williams AJ, Santiago S. Pulmonary disease caused by *Mycobacterium asiaticum*. *Tubercle* 1990; **71**: 303–5.
- 399 Butler WR, Plikaytis BB, Vadney FS, Gross WM. *Mycobacterium celatum* sp. nov. 2018; : 10.
- 400 Falkinham JO. Epidemiology of infection by nontuberculous mycobacteria. *Clin Microbiol Rev* 1996; **9**: 177–215.
- 401 Schulze-Röbbecke R, Feldmann C, Fischeider R, Janning B, Exner M, Wahl G. Dental units: an environmental study of sources of potentially pathogenic mycobacteria. *Tuber Lung Dis* 1995; **76**: 318–23.
- 402 Primm TP, Lucero CA, Falkinham JO. Health impacts of environmental mycobacteria. *Clin Microbiol Rev* 2004; **17**: 98–106.
- 403 Meyers H, Brown-Elliott BA, Moore D, et al. An outbreak of *Mycobacterium chelonae* infection following liposuction. *Clin Infect Dis* 2002; **34**: 1500–7.
- 404 Springer B, Tortoli E, Richter I, et al. *Mycobacterium conspicuum* sp. nov., a new species isolated from patients with disseminated infections. *Journal of clinical microbiology* 1995; **33**: 2805–11.
- 405 Mazumder SA, Hicks A, Norwood J. *Mycobacterium gordonae* pulmonary infection in an immunocompetent adult. *N Am J Med Sci* 2010; **2**: 205–7.
- 406 Engel HW, Berwald LG, Havelaar AH. The occurrence of *Mycobacterium kansasii* in tapwater. *Tubercle* 1980; **61**: 21–6.
- 407 Hsu P-Y, Yang Y-H, Hsiao C-H, Lee P-I, Chiang B-L. MYCOBACTERIUM KANSASII INFECTION PRESENTING AS CELLULITIS IN A PATIENT WITH SYSTEMIC LUPUS ERYTHEMATOSUS. *J Formos Med Assoc* 2002; **101**: 4.
- 408 Zaugg M, Salfinger M, Opravil M, Lüthy R. Extrapulmonary and disseminated infections due to *Mycobacterium malmoense*: case report and review. *Clin Infect Dis* 1993; **16**: 540–9.
- 409 Lahey T. Invasive *Mycobacterium marinum* Infections. *Emerg Infect Dis* 2003; **9**: 1496–8.
- 410 Nagao K, Ota T, Tanikawa A, et al. Genetic identification and detection of human pathogenic *Rhizopus* species, a major mucormycosis agent, by multiplex PCR based on internal transcribed spacer region of rRNA gene. *Journal of Dermatological Science* 2005; **39**: 23–31.
- 411 Wallace RJ, Brown-Elliott BA, Wilson RW, et al. Clinical and Laboratory Features of *Mycobacterium porcinum*. *J Clin Microbiol* 2004; **42**: 5689–97.
- 412 Bercovier H, Vincent V. Mycobacterial infections in domestic and wild animals due to *Mycobacterium marinum*, *M. fortuitum*, *M. chelonae*, *M. porcinum*, *M. farcinogenes*, *M. smegmatis*, *M. scrofulaceum*, *M. xenopi*, *M. kansasii*, *M. simiae* and *M. genavense*. *Rev - Off Int Epizoot* 2001; **20**: 265–90.
- 413 Wallace RJ, Brown-Elliott BA, Brown J, et al. Polyphasic Characterization Reveals that the Human Pathogen *Mycobacterium peregrinum* Type II Belongs to the Bovine Pathogen Species *Mycobacterium senegalense*. *J Clin Microbiol* 2005; **43**: 5925–35.
- 414 Tsukamura M. *Mycobacterium shimoidei* s p . nov., nom. rev., a Lung Pathogen. 2018; : 3.
- 415 Galizzi N, Tortoli E, Gori A, Morini F, Lapadula G. A Case of Mild Pulmonary Disease Due to *Mycobacterium shimoidei* with a Favorable Outcome. *J Clin Microbiol* 2013; **51**: 3467–8.
- 416 Wallace RJ, Nash DR, Tsukamura M, Blacklock ZM, Silcox VA. Human disease due to *Mycobacterium smegmatis*. *J Infect Dis* 1988; **158**: 52–9.
- 417 Maloney JM, Gregg CR, Stephens DS, Manian FA, Rimland D. Infections caused by *Mycobacterium szulgai* in humans. *Rev Infect Dis* 1987; **9**: 1120–6.
- 418 Van der Werf TS, Van der Graaf WT, Tappero JW, Asiedu K. *Mycobacterium ulcerans* infection. *The Lancet* 1999; **354**: 1013–8.
- 419 Simor AE, Salit IE, Vellend H. The role of *Mycobacterium xenopi* in human disease. *Am Rev Respir Dis* 1984; **129**: 435–8.
- 420 Costrini NV, Kogan M. Lectin-Induced inhibition of Nerve Growth Factor Binding by Receptors of Sympathetic Ganglia. *Journal of Neurochemistry* 1981; **36**: 1175–80.

- 421 Reyn CFV, Green PA, McCormick D, *et al.* Dual skin testing with Mycobacterium avium sensitin and purified protein derivative to discriminate pulmonary disease due to M. avium complex from pulmonary disease due to Mycobacterium tuberculosis. *J Infect Dis* 1998.
- 422 Inderlied CB, Kemper CA, Bermudez LE. The Mycobacterium avium complex. *Clin Microbiol Rev* 1993; **6**: 266–310.
- 423 Masur H. Recommendations on Prophylaxis and Therapy for Disseminated Mycobacterium avium Complex Disease in Patients Infected with the Human Immunodeficiency Virus. *New England Journal of Medicine* 1993; **329**: 898–904.
- 424 Naranjo V, Gortazar C, Vicente J, de la Fuente J. Evidence of the role of European wild boar as a reservoir of Mycobacterium tuberculosis complex. *Veterinary Microbiology* 2008; **127**: 1–9.
- 425 Rodrigue DC, Tauxe RV, Rowe B. International increase in Salmonella enteritidis: a new pandemic? *Epidemiol Infect* 1990; **105**: 21–7.
- 426 Fine PE. Leprosy: the epidemiology of a slow bacterium. *Epidemiol Rev* 1982; **4**: 161–88.
- 427 Suzuki K, Akama T, Kawashima A, Yoshihara A, Yotsu RR, Ishii N. Current status of leprosy: epidemiology, basic science and clinical perspectives. *J Dermatol* 2012; **39**: 121–9.
- 428 Smith NH, Dale J, Inwald J, *et al.* The population structure of Mycobacterium bovis in Great Britain: Clonal expansion. *Proc Natl Acad Sci U S A* 2003; **100**: 15271–5.
- 429 Michalak K, Austin C, Diesel S, Bacon MJ, Zimmerman P, Maslow JN. Mycobacterium tuberculosis infection as a zoonotic disease: transmission between humans and elephants. *Emerging Infect Dis* 1998; **4**: 283–7.
- 430 Deighton FC, Mulder JL. Mycocentrospora acerina as a human pathogen. *Transactions of the British Mycological Society* 1977; **69**: 326–7.
- 431 Waites KB, Talkington DF. Mycoplasma pneumoniae and its role as a human pathogen. *Clin Microbiol Rev* 2004; **17**: 697–728, table of contents.
- 432 Visvesvara GS, Stehr-Green JK. Epidemiology of Free-Living Ameba Infections <sup>1</sup>. *The Journal of Protozoology* 1990; **37**: 25s–33s.
- 433 Whitehouse CA. Crimean-Congo hemorrhagic fever. *Antiviral Res* 2004; **64**: 145–60.
- 434 Ajello L. Natural history of the dermatophytes and related fungi. *Mycopathologia et Mycologia Applicata* 1974; **53**: 93–110.
- 435 Sigler L, Summerbell RC, Poole L, *et al.* Invasive Natrassia mangiferae infections: case report, literature review, and therapeutic and taxonomic appraisal. *J Clin Microbiol* 1997; **35**: 433–40.
- 436 Sarafian SK, Knapp JS. Molecular epidemiology of gonorrhoea. *Clin Microbiol Rev* 1989; **2**: S49–55.
- 437 Cohn AC, MacNeil JR, Harrison LH, *et al.* Changes in Neisseria meningitidis Disease Epidemiology in the United States, 1998–2007: Implications for Prevention of Meningococcal Disease. *Clin Infect Dis* 2010; **50**: 184–91.
- 438 Stephens DS, Greenwood B, Br P, *et al.* (Prof P Brandtzaeg MD). Correspondence to: .
- 439 SWAIN CL, MARTIN DR. Survival of meningococci outside of the host: implications for acquisition. *Epidemiol Infect* 2007; **135**: 315–20.
- 440 Doern GV, Blacklow NR, Gantz NM, Aucoin P, Fischer RA, Parker DS. Neisseria sicca osteomyelitis. *J Clin Microbiol* 1982; **16**: 595–7.
- 441 Richards MR, Lowary TL. Chemistry and biology of galactofuranose-containing polysaccharides. *ChemBiochem* 2009; **10**: 1920–38.
- 442 Satterwhite TK, Wallace RJ. Primary Cutaneous Nocardiosis. *JAMA* 1979; **242**: 333–6.
- 443 Smego RA, Gallis HA. The Clinical Spectrum of Nocardia brasiliensis Infection in the United States. *Rev Infect Dis* 1984; **6**: 164–80.
- 444 Torres OH, Domingo P, Pericas R, Boiron P, Montiel JA, Vázquez G. Infection caused by Nocardia farcinica: case report and review. *Eur J Clin Microbiol Infect Dis* 2000; **19**: 205–12.
- 445 Didier ES, Stovall ME, Green LC, Brindley PJ, Sestak K, Didier PJ. Epidemiology of microsporidiosis: sources and modes of transmission. *Vet Parasitol* 2004; **126**: 145–66.
- 446 Bethony J, Brooker S, Albonico M, *et al.* Soil-transmitted helminth infections: ascariasis, trichuriasis, and hookworm. *The Lancet* 2006; **367**: 1521–32.
- 447 Ghai RR, Chapman CA, Omeja PA, Davies TJ, Goldberg TL. Nodule Worm Infection in Humans and Wild Primates in Uganda: Cryptic Species in a Newly Identified Region of Human Transmission. *PLoS Negl Trop Dis* 2014; **8**. DOI:10.1371/journal.pntd.0002641.

- 448 Gasser RB, Woods WG, Huffman MA, Blotkamp J, Polderman AM. Molecular separation of Oesophagostomum stephanostomum and Oesophagostomum bifurcum (Nematoda: Strongyloidea) from non-human primates. Note: Nucleotide sequences reported in this paper are available in the GenBank™ database under the accession numbers AF136575 and AF136576.1. *International Journal for Parasitology* 1999; **29**: 1087–91.
- 449 Novakova A. Interesting and rare saprotrophic microfungi isolated from excrements and other substrata in the Domica and Ardovska Caves (Slovak Karst National Park, Slovakia). *ResearchGate* 2005; published online April. [https://www.researchgate.net/publication/277015342\\_Interesting\\_and\\_rare\\_saprotrophic\\_microfungi\\_isolated\\_from\\_excrements\\_and\\_other\\_substrata\\_in\\_the\\_Domica\\_and\\_Ardovska\\_Caves\\_Slovak\\_Karst\\_National\\_Park\\_Slovakia/citations](https://www.researchgate.net/publication/277015342_Interesting_and_rare_saprotrophic_microfungi_isolated_from_excrements_and_other_substrata_in_the_Domica_and_Ardovska_Caves_Slovak_Karst_National_Park_Slovakia/citations) (accessed March 24, 2020).
- 450 Osei-Atweneboana MY, Eng JK, Boakye DA, Gyapong JO, Prichard RK. Prevalence and intensity of Onchocerca volvulus infection and efficacy of ivermectin in endemic communities in Ghana: a two-phase epidemiological study. *Lancet* 2007; **369**: 2021–9.
- 451 Schiller JT, Lowy DR. Vaccines to prevent infections by oncoviruses. *Annu Rev Microbiol* 2010; **64**: 23–41.
- 452 Sithithaworn P, Haswell-Elkins M. Epidemiology of Opisthorchis viverrini. *Acta Trop* 2003; **88**: 187–94.
- 453 Reeves WC, Hammon WM. California encephalitis virus, a newly described agent. III. Mosquito infection and transmission. *J Immunol* 1952; **69**: 511–4.
- 454 Gauci PJ, McAllister J, Mitchell IR, Weir RP, Melville LF, Gubala AJ. Genomic characterisation of Trubanaman and Gan Gan viruses, two bunyaviruses with potential significance to public health in Australia. *Virology Reports* 2016; **6**: 1–10.
- 455 Haddow AD, Odoi A. The incidence risk, clustering, and clinical presentation of La Crosse virus infections in the eastern United States, 2003–2007. *PLoS ONE* 2009; **4**: e6145.
- 456 Carvalho MGC, Frugulhetti IC, Rebello MA. Marituba (Bunyaviridae) virus replication in cultured Aedes albopictus cells and in L-A9 cells. *Archives of Virology* 1986; **90**: 325–35.
- 457 Gomes MLC, Freitas RB, Travassos da Rosa JFS, et al. Oropouche Virus: I. A Review of Clinical, Epidemiological, and Ecological Findings\*. *The American Journal of Tropical Medicine and Hygiene* 1981; **30**: 149–60.
- 458 Fernando R, Capone D, Elich S, et al. Infection with New York Orthohantavirus and Associated Respiratory Failure and Multiple Cerebral Complications. *Emerg Infect Dis* 2019; **25**: 1241–3.
- 459 Yuen M-F, Chen D-S, Dusheiko GM, et al. Hepatitis B virus infection. *Nat Rev Dis Primers* 2018; **4**: 18035.
- 460 Shepard CW, Finelli L, Alter MJ. Global epidemiology of hepatitis C virus infection. *Lancet Infect Dis* 2005; **5**: 558–67.
- 461 Zhou H, Ma Z, Hu T, et al. Tamdy Virus in Ixodid Ticks Infesting Bactrian Camels, Xinjiang, China, 2018. *Emerg Infect Dis* 2019; **25**: 2136–8.
- 462 Walsh EE, Hall CB. Respiratory Syncytial Virus (RSV). In: Mandell, Douglas, and Bennett's Principles and Practice of Infectious Diseases. Elsevier, 2015: 1948–1960.e3.
- 463 Vorou RM, Papavassiliou VG, Pierrotsakos IN. Cowpox virus infection: an emerging health threat. *Curr Opin Infect Dis* 2008; **21**: 153–6.
- 464 Arita I, Jezek Z, Khodakevich L, Ruti K. Human Monkeypox: A Newly Emerged Orthopoxvirus Zoonosis in the Tropical Rain Forests of Africa. *The American Journal of Tropical Medicine and Hygiene* 1985; **34**: 781–9.
- 465 Lee BL, Grossniklaus HE, Capone A, Padhye AA, Sekhon AS. Ovarian Endothelium Inflammation After Cataract Surgery. *American Journal of Ophthalmology* 1995; **119**: 307–12.
- 466 Möller C, Dreyfuss MM. Microfungi from Antarctic Lichens, Mosses and Vascular Plants. *Mycologia* 1996; **88**: 922–33.
- 467 Piccini C, D'Alessandro B, Antúnez K, Zunino P. [No title found]. *World Journal of Microbiology and Biotechnology* 2002; **18**: 761–5.
- 468 Walboomers JM, Jacobs MV, Manos MM, et al. Human papillomavirus is a necessary cause of invasive cervical cancer worldwide. *J Pathol* 1999; **189**: 12–9.
- 469 Brummer E, Castaneda E, Restrepo A. Paracoccidioidomycosis: an update. *Clin Microbiol Rev* 1993; **6**: 89–117.
- 470 Aka NA, Adoubryn K, Rondelaud D, Dreyfuss G. Human paragonimiasis in Africa. *Ann Afr Med* 2008; **7**: 153–62.
- 471 Little MD. Paragonimus caliensis sp. n. and paragonimiasis in Colombia. *J Parasitol* 1968; **54**: 738–46.
- 472 Dekumyoy P, Waikagul J, Eom KS. Human lung fluke Paragonimus heterotremus: differential diagnosis between Paragonimus heterotremus and Paragonimus westermani infections by EITB. *Trop Med Int Health* 1998; **3**: 52–6.
- 473 Huei-lan C, Chih-piao H, Lien-yin H, et al. Studies on a new pathogenic lung fluke--Paragonimus hueit'ungensis sp. nov. *Chin Med J* 1977; **3**: 379–94.
- 474 Johannesen E, Nguyen V. Paragonimus kellicotti : A Lung Infection in Our Own Backyard. *Case Reports in Pathology* 2016; **2016**: 1–3.

- 475 Vargas-Arzola J, Segura-Salvador A, Reyes-Velasco L, et al. Detection of *Paragonimus mexicanus* (Trematoda) metacercariae in crabs from Oaxaca, Mexico. *Acta Tropica* 2014; **137**: 95–8.
- 476 Blair null, Agatsuma null, Watanobe null. Molecular evidence for the synonymy of three species of paragonimus, P. ohirai miyazaki, 1939, P. iloktsuenensis chen, 1940 and P. sadoensis miyazaki et al., 1968. *J Helminthol* 1997; **71**: 305–10.
- 477 Sugiyama H, Morishima Y, Kameoka Y, Arakawa K, Kawanaka M. *Paragonimus ohirai* metacercariae in crabs collected along the Arakawa River in Tokyo, Japan. *J Vet Med Sci* 2004; **66**: 927–31.
- 478 Cabrera BD. Paragonimiasis in the Philippines: current status. *Arzneimittelforschung* 1984; **34**: 1188–92.
- 479 Agatsuma T, Habe S. Genetic variability and differentiation of natural populations in three Japanese lung flukes, *Paragonimus ohirai*, *Paragonimus iloktsuenensis* and *Paragonimus sadoensis* (Digenea: Troglotrematidae). *J Parasitol* 1986; **72**: 417–33.
- 480 Yaemput S, Dekumyoy P, Visiassuk K. The natural first intermediate host of *Paragonimus siamensis* (Miyazaki and Wykoff, 1965) in Thailand. *Southeast Asian J Trop Med Public Health* 1994; **25**: 284–90.
- 481 Blair D, Zhengshan C, Minggang C, et al. *Paragonimus skrjabini* Chen, 1959 (Digenea: Paragonimidae) and related species in eastern Asia: a combined molecular and morphological approach to identification and taxonomy. *Syst Parasitol* 2005; **60**: 1–21.
- 482 Ochigbo SO, Ekanem EE, Udo JJ. Prevalence and intensity of *Paragonimus uterobilateralis* infection among school children in Oban village, South Eastern, Nigeria. *Trop Doct* 2007; **37**: 224–6.
- 483 Kalhan S, Sharma P, Sharma S, Kakria N, Dudani S, Gupta A. *Paragonimus westermani* infection in lung: A confounding diagnostic entity. *Lung India* 2015; **32**: 265–7.
- 484 Miyazaki I, Vajrasthira S. ON A NEW LUNG FLUKE, PARAGONIMUS BANGKOKENSIS sp. nov. IN THAILAND (TRAMATODA: TROGLOTREMATIDAE). *JMSB* 1967; **20**: 243–9.
- 485 Groves RW, Wilson-Jones E, MacDonald DM. Human orf and milkers' nodule: a clinicopathologic study. *J Am Acad Dermatol* 1991; **25**: 706–11.
- 486 Werchniak AE, Herfort OP, Farrell TJ, Connolly KS, Baughman RD. Milker's nodule in a healthy young woman. *J Am Acad Dermatol* 2003; **49**: 910–1.
- 487 Leavell UW, Phillips IA. Milker's nodules. Pathogenesis, tissue culture, electron microscopy, and calf inoculation. *Arch Dermatol* 1975; **111**: 1307–11.
- 488 Heegaard ED, Brown KE. Human Parvovirus B19. *Clinical Microbiology Reviews* 2002; **15**: 485–505.
- 489 Escande F, Lion C. Epidemiology of human infections by *Pasteurella* and related groups in France. *Zentralblatt für Bakteriologie* 1993; **279**: 131–9.
- 490 Kainz A, Lubitz W, Busse H-J. Genomic Fingerprints, ARDRA Profiles and Quinone Systems for Classification of *Pasteurella sensu stricto*. *Systematic and Applied Microbiology* 2000; **23**: 494–503.
- 491 Allison K, Clarridge JE. Long-Term Respiratory Tract Infection with Canine-Associated *Pasteurella dagmatis* and *Neisseria canis* in a Patient with Chronic Bronchiectasis. *Journal of Clinical Microbiology* 2005; **43**: 4272–4.
- 492 Callegari D, Kramer L, Cantoni AM, Di Lecce R, Dodi PL, Grandi G. Canine bladderworm (*Capillaria plica*) infection associated with glomerular amyloidosis. *Veterinary Parasitology* 2010; **168**: 338–41.
- 493 Reshetnyak VI, Karlovich TI, Ilchenko LU. Hepatitis G virus. *World J Gastroenterol* 2008; **14**: 4725–34.
- 494 Lyratzopoulos G, Ellis M, Nerringer R, Denning DW. Invasive Infection due to *Penicillium* Species other than *P. marneffeii*. *Journal of Infection* 2002; **45**: 184–95.
- 495 Engleberg NC, Johnson J, Bluestein J, Madden K, Rinaldi MG. Phaeoophomycotic cyst caused by a recently described species, *Phaeoannellomyces elegans*. *J Clin Microbiol* 1987; **25**: 605–8.
- 496 Scott RS, Sutton DA, Jagirdar J. Lung infection due to opportunistic fungus, *Phialemonium obovatum*, in a bone marrow transplant recipient: an emerging infection with fungemia and Crohn disease-like involvement of the gastrointestinal tract. *Ann Diagn Pathol* 2005; **9**: 227–30.
- 497 Lomax LG, Cole JR, Padhye AA, Ajello L, Chandler FW, Smith BR. Osteolytic phaeoophomycosis in a German shepherd dog caused by *Phialemonium obovatum*. *J Clin Microbiol* 1986; **23**: 987–91.
- 498 Medlar EM. A New Fungus, *Phialophora verrucosa*, Pathogenic for Man. *Mycologia* 1915; **7**: 200–3.
- 499 Bird BH, Ksiazek TG, Nichol ST, Maclachlan NJ. Rift Valley fever virus. *J Am Vet Med Assoc* 2009; **234**: 883–93.
- 500 Dionisio D, Esperti F, Vivarelli A, Valassina M. Epidemiological, clinical and laboratory aspects of sandfly fever. *Curr Opin Infect Dis* 2003; **16**: 383–8.



- 501 Eisa M. Preliminary survey of domestic animals of the Sudan for precipitating antibodies to Rift Valley fever virus. *J Hyg (Lond)* 1984; **93**: 629–37.
- 502 Zaitz C, Heins-Vaccari EM, Freitas RS de, *et al.* SUBCUTANEOUS PHEOHYPHOMYCOSIS CAUSED BY *Phoma cava*: REPORT OF A CASE AND REVIEW OF THE LITERATURE. *Rev Inst Med trop S Paulo* 1997; **39**: 43–8.
- 503 Bonifaz A, Gómez-Daza F, Paredes V, Ponce RM. Tinea versicolor, tinea nigra, white piedra, and black piedra. *Clinics in Dermatology* 2010; **28**: 140–5.
- 504 Gajadhar AA. Foodborne Parasites in the Food Supply Web: Occurrence and Control. Woodhead Publishing, 2015.
- 505 Coulson RMR, Hall N, Ouzounis CA. Comparative genomics of transcriptional control in the human malaria parasite *Plasmodium falciparum*. *Genome Res* 2004; **14**: 1548–54.
- 506 Mueller I, Zimmerman PA, Reeder JC. *Plasmodium malariae* and *Plasmodium ovale*—the ‘bashful’ malaria parasites. *Trends Parasitol* 2007; **23**: 278–83.
- 507 Collins WE, Jeffery GM. *Plasmodium ovale*: Parasite and Disease. *Clin Microbiol Rev* 2005; **18**: 570–81.
- 508 Brasil P, Zalis MG, de Pina-Costa A, *et al.* Outbreak of human malaria caused by *Plasmodium simium* in the Atlantic Forest in Rio de Janeiro: a molecular epidemiological investigation. *The Lancet Global Health* 2017; **5**: e1038–46.
- 509 Marchesini P, Carter R, Mendis K, Sina B. The neglected burden of *Plasmodium vivax* malaria. *The American Journal of Tropical Medicine and Hygiene* 2001; **64**: 97–106.
- 510 Dumoulin A, Mazars E, Seguy N, *et al.* Transmission of *Pneumocystis carinii* disease from immunocompetent contacts of infected hosts to susceptible hosts. *Eur J Clin Microbiol Infect Dis* 2000; **19**: 671–8.
- 511 Tan CS, Korahnik IJ. Progressive multifocal leukoencephalopathy and other disorders caused by JC virus: clinical features and pathogenesis. *Lancet Neurol* 2010; **9**: 425–37.
- 512 Weber T. Progressive multifocal leukoencephalopathy. *Neural Clin* 2008; **26**: 833–54, x–xi.
- 513 WILLEMS A, COLLINS MD. Reclassification of *Oribaculum cationiae* (Moore and Moore 1994) as *Porphyromonas cationiae* comb. nov. and Emendation of the Genus *Porphyromonas*. *International Journal of Systematic and Evolutionary Microbiology*, 1995; **45**: 578–81.
- 514 Moore LV, Johnson JL, Moore WE. Descriptions of *Prevotella tanneriae* sp. nov. and *Prevotella enoeca* sp. nov. from the human gingival crevice and emendation of the description of *Prevotella zoogloformans*. *Int J Syst Bacteriol* 1994; **44**: 599–602.
- 515 O’Flynn C, Deusch O, Darling AE, *et al.* Comparative Genomics of the Genus *Porphyromonas* Identifies Adaptations for Heme Synthesis within the Prevalent Canine Oral Species *Porphyromonas cangingivalis*. *Genome Biol Evol* 2015; **7**: 3397–413.
- 516 Walter MRV, Morck DW. In vitro expression of tumor necrosis factor- $\alpha$ , interleukin 1 $\beta$ , and interleukin 8 mRNA by bovine macrophages following exposure to *Porphyromonas levii*. *Can J Vet Res* 2002; **66**: 93–8.
- 517 Hillier SL, Kiviat NB, Hawes SE, *et al.* Role of bacterial vaginosis-associated microorganisms in endometritis. *American Journal of Obstetrics and Gynecology* 1996; **175**: 435–41.
- 518 Talan DA, Abrahamian FM, Moran GJ, Citron DM, Tan JO, Goldstein EJC. Clinical Presentation and Bacteriologic Analysis of Infected Human Bites in Patients Presenting to Emergency Departments. *Clin Infect Dis* 2003; **37**: 1481–9.
- 519 Dewhirst FE, Chen T, Izard J, *et al.* The Human Oral Microbiome. *J Bacteriol* 2010; **192**: 5002–17.
- 520 Sikorska B, Liberski PP. Human Prion Diseases: From Kuru to Variant Creutzfeldt-Jakob Disease. In: Harris JR, ed. Protein Aggregation and Fibrillogenesis in Cerebral and Systemic Amyloid Disease. Dordrecht: Springer Netherlands, 2012: 457–96.
- 521 Kamin M, Patten B. Creutzfeldt-Jakob disease: Possible transmission to humans by consumption of wild animal brains. *The American Journal of Medicine* 1984; **76**: 142–5.
- 522 Bowden GHW. Actinomyces, Propionibacterium propionicus, and Streptomyces. In: Baron S, ed. Medical Microbiology, 4th edn. Galveston (TX): University of Texas Medical Branch at Galveston, 1996. <http://www.ncbi.nlm.nih.gov/books/NBK8385/> (accessed March 24, 2020).
- 523 Valour F, Ferry T, Karsenty J, *et al.* Actinomycosis: etiology, clinical features, diagnosis, treatment, and management. *Infection and Drug Resistance* 2014; : 183.
- 524 Pignato S, Giammanco GM, Grimont F, Grimont PA, Giammanco G. Molecular characterization of the genera *Proteus*, *Morganella*, and *Providencia* by ribotyping. *J Clin Microbiol* 1999; **37**: 2840–7.
- 525 Falagas ME, Kavvadia PK, Mantadakis E, *et al.* *Morganella morganii* infections in a general tertiary hospital. *Infection* 2006; **34**: 315–21.
- 526 Bernstein EF, Schuster MG, Stieritz DD, Heuman PC, Uitto J. Disseminated cutaneous *Pseudallescheria boydii*. *Br J Dermatol* 1995; **132**: 456–60.

- 527 Sutton DA, Timm WD, Morgan-Jones G, Rinaldi MG. Human Phaeohyphomycotic Osteomyelitis Caused by the Coelomycete *Phomopsis Saccardo* 1905: Criteria for Identification, Case History, and Therapy. *J Clin Microbiol* 1999; **37**: 807–11.
- 528 Bodey GP, Bolivar R, Fainstein V, Jadeja L. Infections Caused by *Pseudomonas aeruginosa*. *Rev Infect Dis* 1983; **5**: 279–313.
- 529 Noble RC, Overman SB. *Pseudomonas stutzeri* infection a review of hospital isolates and a review of the literature. *Diagnostic Microbiology and Infectious Disease* 1994; **19**: 51–6.
- 530 Rollinson D. *Advances in parasitology*. Volume eighty two. Amsterdam; Oxford: Elsevier ; Academic Press, 2013  
<http://public.ebookcentral.proquest.com/choice/publicfullrecord.aspx?p=1172781> (accessed March 24, 2020).
- 531 Khan SU, Gurley ES, Hossain MJ, Nahar N, Sharker MAY, Luby SP. A Randomized Controlled Trial of Interventions to Impede Date Palm Sap Contamination by Bats to Prevent Nipah Virus Transmission in Bangladesh. *PLoS One* 2012; **7**. DOI:10.1371/journal.pone.0042689.
- 532 Thiyagarajan M, Bagul A, Nicholson ML. A nodulo-cystic eumycetoma caused by *Pyrenochaeta romeroi* in a renal transplant recipient: A case report. *J Med Case Reports* 2011; **5**: 460.
- 533 Badali H, Bonifaz A, Barrón-Tapia T, et al. *Rhinoctadiella aquaspersa*, proven agent of verrucous skin infection and a novel type of chromoblastomycosis. *Med Mycol* 2010; **48**: 696–703.
- 534 Del Palacio-Hernanz A, Moore MK, Campbell CK, Del Palacio-Perez-Medel A, Del Castillo-Cantero R. Infection of the central nervous system by *Rhinoctadiella atrovirens* in a patient with acquired immunodeficiency syndrome. *Med Mycol* 1989; **27**: 127–30.
- 535 Berman JJ. *Taxonomic guide to infectious diseases: understanding the biologic classes of pathogenic organisms*, 1st ed. London ; Waltham, MA: Elsevier/Academic Press, 2012.
- 536 Carrion A, Silva M. Chromoblastomycosis and Its Etiologic Fungi. In: *Biology of Pathogenic Fungi*. Waltham, Mass: Chronica Botanica Co, 1947: 20–62.
- 537 Arseculeratne SN. Recent advances in rhinosporidiosis and *Rhinosporidium seeberi*. *Indian J Med Microbiol* 2002; **20**: 119–31.
- 538 Espinel-Ingroff A, Oakley LA, Kerkering TM. Opportunistic zygomycotic infections. *Mycopathologia* 1987; **97**: 33–41.
- 539 Richardson M. The ecology of the Zygomycetes and its impact on environmental exposure. *Clin Microbiol Infect* 2009; **15 Suppl 5**: 2–9.
- 540 Severo LC, Job F, Mattos TC. Systemic zygomycosis: nosocomial infection by *Rhizomucor pusillus*. *Mycopathologia* 1991; **113**: 79–80.
- 541 Schipper MAA, Maslen MM, Hogg GG, Chow CW, Samson RA. Human infection by *Rhizopus azygosporus* and the occurrence of azygospores in Zygomycetes. *Med Mycol* 1996; **34**: 199–203.
- 542 Cheng VCC, Chan JFW, Ngan AHY, et al. Outbreak of intestinal infection due to *Rhizopus microsporus*. *J Clin Microbiol* 2009; **47**: 2834–43.
- 543 Ibrahim AS, Spellberg B, Avanesian V, Fu Y, Edwards JE. *Rhizopus oryzae* adheres to, is phagocytosed by, and damages endothelial cells in vitro. *Infect Immun* 2005; **73**: 778–83.
- 544 Bauer H, Ajello L, Adams E, Hernandez DU. Cerebral mucormycosis: Pathogenesis of the disease. *The American Journal of Medicine* 1955; **18**: 822–31.
- 545 Kaufman DD, Blake J. Degradation of atrazine by soil fungi. *Soil Biology and Biochemistry* 1970; **2**: 73–80.
- 546 Sugar D. *Pear storage decay control through tree management and post-harvest treatment*. Yakima, Washington: Washington State Horticultural Association, 1992.
- 547 Kelly PJ, Beati L, Mason PR, Matthewman LA, Roux V, Raoult D. *Rickettsia africae* sp. nov., the etiological agent of African tick bite fever. *Int J Syst Bacteriol* 1996; **46**: 611–4.
- 548 Parola P, Vestris G, Martinez D, Brochier B, Roux V, Raoult D. Tick-borne rickettiosis in Guadeloupe, the French West Indies: isolation of *Rickettsia africae* from *Amblyomma variegatum* ticks and serosurvey in humans, cattle, and goats. *Am J Trop Med Hyg* 1999; **60**: 888–93.
- 549 Paddock CD, Koss T, Ereemeeva ME, Dasch GA, Zaki SR, Sumner JW. Isolation of *Rickettsia akari* from eschars of patients with rickettsialpox. *Am J Trop Med Hyg* 2006; **75**: 732–8.
- 550 Ogata H, Audic S, Renesto-Audiffren P, et al. Mechanisms of evolution in *Rickettsia conorii* and *R. prowazekii*. *Science* 2001; **293**: 2093–8.
- 551 Rovey C, Brouqui P, Raoult D. Questions on Mediterranean Spotted Fever a Century after Its Discovery. *Emerg Infect Dis* 2008; **14**: 1360–7.
- 552 Fang R, Houhamdi L, Raoult D. Detection of *Rickettsia prowazekii* in Body Lice and Their Feces by Using Monoclonal Antibodies. *Journal of Clinical Microbiology* 2002; **40**: 3358–63.
- 553 Walker DH, Ismail N. Emerging and re-emerging rickettsioses: endothelial cell infection and early disease events. *Nat Rev Microbiol* 2008; **6**: 375–86.

- 554 Kenney M, Eveland LK, Yermakov V, Kassouny DY. A case of Rictularia infection of man in New York. *Am J Trop Med Hyg* 1975; **24**: 596–9.
- 555 Lindquist WD, Li SY. Some nematodes of rats from Guam, M.I. and notes on a species of Reticularia. *J Parasitol* 1955; **41**: 194–7.
- 556 Yue MY, Jensen JM, Jordan HE, Jue. Spirurid Infections (Rictularia sp.) in Golden Marmosets (A), Leontopithecus Rosalia (syn. Leontideus Rosalia) from the Oklahoma City Zoo. *The Journal of Zoo Animal Medicine* 1980; **11**: 77.
- 557 Prober C. Sixth Disease and the Ubiquity of Human Herpesviruses. *N Engl J Med* 2005; **352**: 753–5.
- 558 Estes MK, Palmer EL, Obijeski JF. Rotaviruses: a review. *Curr Top Microbiol Immunol* 1983; **105**: 123–84.
- 559 Leung AKC, Kellner JD, Dele Davies H. Rotavirus gastroenteritis. *Adv Therapy* 2005; **22**: 476–87.
- 560 Gerba CP, Rose JB, Haas CN, Crabtree KD. Waterborne rotavirus: A risk assessment. *Water Research* 1996; **30**: 2929–40.
- 561 Frey TK. Molecular biology of rubella virus. *Adv Virus Res* 1994; **44**: 69–160.
- 562 Lambert N, Strebel P, Orenstein W, Icenogle J, Poland GA. Rubella. *Lancet* 2015; **385**: 2297–307.
- 563 Barr JA, Smith C, Marsh GA, Field H, Wang L-F. Evidence of bat origin for Menangle virus, a zoonotic paramyxovirus first isolated from diseased pigs. *Journal of General Virology* 2012; **93**: 2590–4.
- 564 Bowden TR, Westenberg M, Wang L-F, Eaton BT, Boyle DB. Molecular Characterization of Menangle Virus, a Novel Paramyxovirus which Infects Pigs, Fruit Bats, and Humans. *Virology* 2001; **283**: 358–73.
- 565 Kirkland P, Loveb R, Philbey A, Ross A, Davis R, Hart K. Epidemiology and control of Menangle virus in pigs. *Australian Veterinary Journal* 2001; **79**: 199–206.
- 566 Galazka AM, Robertson SE, Kraigher A. Mumps and mumps vaccine: a global review. *Bull World Health Organ* 1999; **77**: 3–14.
- 567 Greenberger PA. Hypersensitivity pneumonitis: A fibrosing alveolitis produced by inhalation of diverse antigens. *Journal of Allergy and Clinical Immunology* 2019; **143**: 1295–301.
- 568 Baradkar VP, Kumar S. Cutaneous zygomycosis due to Saksenaea vasiformis in an immunocompetent host. *Indian J Dermatol* 2009; **54**: 382–4.
- 569 Lawley TD, Bouley DM, Hoy YE, Gerke C, Relman DA, Monack DM. Host transmission of Salmonella enterica serovar Typhimurium is controlled by virulence factors and indigenous intestinal microbiota. *Infect Immun* 2008; **76**: 403–16.
- 570 Davies PR, Morrow WE, Jones FT, Deen J, Fedorka-Cray PJ, Harris IT. Prevalence of Salmonella in finishing swine raised in different production systems in North Carolina, USA. *Epidemiol Infect* 1997; **119**: 237–44.
- 571 Kidgell C, Reichard U, Wain J, et al. Salmonella typhi, the causative agent of typhoid fever, is approximately 50,000 years old. *Infect Genet Evol* 2002; **2**: 39–45.
- 572 Nauciel C, Espinasse-Maes F. Role of gamma interferon and tumor necrosis factor alpha in resistance to Salmonella typhimurium infection. *Infect Immun* 1992; **60**: 450–4.
- 573 Yu H, Bruno JG. Immunomagnetic-electrochemiluminescent detection of Escherichia coli O157 and Salmonella typhimurium in foods and environmental water samples. *Appl Environ Microbiol* 1996; **62**: 587–92.
- 574 Fayer R. Sarcocystis spp. in human infections. *Clin Microbiol Rev* 2004; **17**: 894–902, table of contents.
- 575 Latif B, Heo CC, Razuin R, Shamalaa DV, Tappe D. Autochthonous human schistosomiasis, Malaysia. *Emerging Infect Dis* 2013; **19**: 1340–1.
- 576 Jourdane J, Southgate VR, Pagès JR, Durand P, Tchuem Tchuente LA. Recent studies on Schistosoma intercalatum: taxonomic status, puzzling distribution and transmission foci revisited. *Mem Inst Oswaldo Cruz* 2001; **96 Suppl**: 45–8.
- 577 Carlton EJ, Hsiang M, Zhang Y, Johnson S, Hubbard A, Spear RC. The impact of Schistosoma japonicum infection and treatment on ultrasound-detectable morbidity: a five-year cohort study in Southwest China. *PLoS Negl Trop Dis* 2010; **4**: e685.
- 578 Wolmarans CT, de Kock KN, van der Walt MP. An experimental Schistosoma mattheei infection in man. *Onderstepoort J Vet Res* 1990; **57**: 211–4.
- 579 Muth S, Sayasone S, Odermatt-Biays S, Phompida S, Duong S, Odermatt P. Schistosoma mekongi in Cambodia and Lao People's Democratic Republic. *Adv Parasitol* 2010; **72**: 179–203.
- 580 Horák P, Mikeš L, Lichtenbergová L, Skála V, Soldánová M, Brant SV. Avian Schistosomes and Outbreaks of Cercarial Dermatitis. *Clin Microbiol Rev* 2015; **28**: 165–90.

- 581 Samerpitak K, Van der Linde E, Choi H-J, *et al.* Taxonomy of *Ochroconis*, genus including opportunistic pathogens on humans and animals. *Fungal Diversity* 2014; **65**: 89–126.
- 582 Giraldo A, Sutton DA, Gené J, Fothergill AW, Cano J, Guarro J. Rare Arthroconidial Fungi in Clinical Samples: *Scytalidium cuboideum* and *Arthrospira hispanica*. *Mycopathologia* 2013; **175**: 115–21.
- 583 Bisiaux-Salauze B, Perez C, Sebald M, Petit JC. Bacteremias caused by *Selenomonas artemidis* and *Selenomonas infelix*. *J Clin Microbiol* 1990; **28**: 140–2.
- 584 Cruz P, Mehretu AM, Buttner MP, Trice T, Howard KM. Development of a polymerase chain reaction assay for the rapid detection of the oral pathogenic bacterium, *Selenomonas noxia*. *BMC Oral Health* 2015; **15**: 95.
- 585 Sekhsokh Y, Arsalane L, El Ouenass M, Doublali T, Bajjou T, Lahlou Amine I. Bactériémie à *Serratia rubidaea*. *Médecine et Maladies Infectieuses* 2007; **37**: 287–9.
- 586 Niyogi SK. Shigellosis. *J Microbiol* 2005; **43**: 133–43.
- 587 Legros D. Shigellosis: Report of a Workshop: held at ICDDR,B: Centre for Health and Population Research, Dhaka, Bangladesh, on 16-18 February 2004. *Journal of Health, Population and Nutrition* 2004; **22**: 445–9.
- 588 Whitley RJ. Herpesviruses. In: Baron S, ed. *Medical Microbiology*, 4th edn. Galveston (TX): University of Texas Medical Branch at Galveston, 1996. <http://www.ncbi.nlm.nih.gov/books/NBK8157/> (accessed March 17, 2020).
- 589 Wald A, Corey L. Persistence in the population: epidemiology, transmission. In: Arvin A, Campadelli-Fiume G, Mocarski E, *et al.*, eds. *Human Herpesviruses: Biology, Therapy, and Immunoprophylaxis*. Cambridge: Cambridge University Press, 2007. <http://www.ncbi.nlm.nih.gov/books/NBK47447/> (accessed March 17, 2020).
- 590 Lapson C. Rat-Bite Fever in Washington DC, Due to *Spirillum Minus* and *Streptobacillus Moniliformis*. CDC, 1941 [https://stacks.cdc.gov/view/cdc/70079/cdc\\_70079\\_DS1.pdf](https://stacks.cdc.gov/view/cdc/70079/cdc_70079_DS1.pdf).
- 591 Gaastra W, Boot R, Ho HTK, Lipman LJA. Rat bite fever. *Vet Microbiol* 2009; **133**: 211–28.
- 592 Kauffman CA, Bustamante B, Chapman SW, Pappas PG. Clinical Practice Guidelines for the Management of Sporotrichosis: 2007 Update by the Infectious Diseases Society of America. *Clin Infect Dis* 2007; **45**: 1255–65.
- 593 Archer GL. *Staphylococcus aureus*: a well-armed pathogen. *Clin Infect Dis* 1998; **26**: 1179–81.
- 594 Kanuparth A, Challa T, Meegada S, Siddamreddy S, Muppudi V. *Staphylococcus warneri*: Skin Commensal and a Rare Cause of Urinary Tract Infection. *Cureus* 2020; published online May 28. DOI:10.7759/cureus.8337.
- 595 Brooke JS. *Stenotrophomonas maltophilia*: an emerging global opportunistic pathogen. *Clin Microbiol Rev* 2012; **25**: 2–41.
- 596 Elliott SP. Rat bite fever and *Streptobacillus moniliformis*. *Clin Microbiol Rev* 2007; **20**: 13–22.
- 597 Johansson L, Thulin P, Low DE, Norrby-Teglund A. Getting under the skin: the immunopathogenesis of *Streptococcus pyogenes* deep tissue infections. *Clin Infect Dis* 2010; **51**: 58–65.
- 598 Klein RS, Catalano MT, Edberg SC, Casey JJ, Steigbigel NH. *Streptococcus bovis* septicemia and carcinoma of the colon. *Ann Intern Med* 1979; **91**: 560–2.
- 599 Clarridge JE, Attorri S, Musher DM, Hebert J, Dunbar S. *Streptococcus intermedius*, *Streptococcus constellatus*, and *Streptococcus anginosus* ('*Streptococcus milleri* Group') Are of Different Clinical Importance and Are Not Equally Associated with Abscess. *Clinical Infectious Diseases* 2001; **32**: 1511–5.
- 600 Weese JS, Jarlot C, Morley PS. Survival of *Streptococcus equi* on surfaces in an outdoor environment. *Can Vet J* 2009; **50**: 968–70.
- 601 Mosailova N, Truong J, Dietrich T, Ashurst J. *Streptococcus gordonii*: A Rare Cause of Infective Endocarditis. *Case Reports in Infectious Diseases* 2019; **2019**: 1–2.
- 602 Yombi J cyr, Belkhir L, Jonckheere S, *et al.* *Streptococcus gordonii* septic arthritis : two cases and review of literature. *BMC Infect Dis* 2012; **12**: 215.
- 603 Seipke RF, Kaltenpoth M, Hutchings MI. *Streptomyces* as symbionts: an emerging and widespread theme? *FEMS Microbiol Rev* 2012; **36**: 862–76.
- 604 Quintana ET, Wierzbicka K, Mackiewicz P, *et al.* *Streptomyces sudanensis* sp. nov., a new pathogen isolated from patients with actinomycetoma. *Antonie van Leeuwenhoek* 2008; **93**: 305–13.
- 605 Viney ME, Lok JB. The biology of *Strongyloides* spp. WormBook, 2018 <http://www.ncbi.nlm.nih.gov/books/NBK19795/> (accessed March 16, 2020).
- 606 Réblová M, Seifert KA, Fournier J, Štěpánek V. Newly recognised lineages of perithecial ascomycetes: the new orders Conioscyphales and Pleurotheciales. *Persoonia* 2016; **37**: 57–81.

- 607 Costa PSG da, Mendes JM de C, Ribeiro GM. Tatumella ptyseos causing severe human infection: report of the first two Brazilian cases. *Braz J Infect Dis* 2008; **12**. DOI:10.1590/S1413-86702008000500017.
- 608 Markham WD, Key RD, Padhye AA, Ajello L. Phaeohyphomycotic cyst caused by *Tetraploa aristata*. *J Med Vet Mycol* 1990; **28**: 147–50.
- 609 Lvov DK, Karas FR, Tsyarkin YM, *et al.* Batken virus, a new arbovirus isolated from ticks and mosquitoes in Kirghiz S.S.R. *Arch Gesamte Virusforsch* 1974; **44**: 70–3.
- 610 Labuda M, Nuttall PA. Tick-borne viruses. *Parasitology* 2004; **129**: S221–45.
- 611 Magnaval JF, Glickman LT, Dorchie P, Morassin B. Highlights of human toxocarasis. *Korean J Parasitol* 2001; **39**: 1–11.
- 612 Tenter AM, Heckerth AR, Weiss LM. *Toxoplasma gondii*: from animals to humans. *Int J Parasitol* 2000; **30**: 1217–58.
- 613 Stamm LV. Pinta: Latin America's Forgotten Disease? *Am J Trop Med Hyg* 2015; **93**: 901–3.
- 614 Aristone A. Syphilis: Etiology, Epidemiology, and Origin Theory. *Totem: The University of Western Ontario Journal of Anthropology* 2011; **3**. <https://ir.lib.uwo.ca/totem/vol3/iss1/6>.
- 615 Yao C, Prestwood AK, McGraw RA. *Trichinella spiralis* (T1) and *Trichinella T5*: a comparison using animal infectivity and molecular biology techniques. *J Parasitol* 1997; **83**: 88–95.
- 616 Chouaki T, Lavarde V, Lachaud L, Raccurt CP, Hennequin C. Invasive Infections Due to *Trichoderma* Species: Report of 2 Cases, Findings of In Vitro Susceptibility Testing, and Review of the Literature. *CLIN INFECT DIS* 2002; **35**: 1360–7.
- 617 Coleman JS, Gaydos CA, Witter F. *Trichomonas vaginalis* Vaginitis in Obstetrics and Gynecology Practice: New Concepts and Controversies. *Obstetrical & Gynecological Survey* 2013; **68**: 43–50.
- 618 Ames I. Dermatophytosis. *Inst Int Coop Anim Biol* 2013; **3**: 1–13.
- 619 Branscomb R. The Dermatophytes. *Lab Med* 2005; **36**: 496–500.
- 620 Lamb SR, Rademaker M. Tinea due to *Trichophyton violaceum* and *Trichophyton soudanense* in Hamilton, New Zealand. *Australas J Dermatol* 2001; **42**: 260–3.
- 621 Stockdale PM, Mackenzie DW, Austwick PK. *Arthroderma simii* sp. nov., the perfect state of *Trichophyton simii* (Pinoy) comb. nov. *Sabouraudia* 1965; **4**: 112–23.
- 622 Saxena P, Kumar A, Shrivastava JN. Diversity of keratinophilic mycoflora in the soil of Agra (India). *Folia Microbiol (Praha)* 2004; **49**: 430–4.
- 623 Rippon JW, Eng A, Malkinson FD. *Trichophyton simii* Infection in the United States. *Arch Dermatol* 1968; **98**: 615–9.
- 624 Wolf DG, Falk R, Hacham M, *et al.* Multidrug-resistant *Trichosporon asahii* infection of nongranulocytopenic patients in three intensive care units. *J Clin Microbiol* 2001; **39**: 4420–5.
- 625 Passo CL, Pernice I, Celeste A, Perdichizzi G, Todaro-Luck F. Transmission of *Trichosporon asahii* oesophagitis by a contaminated endoscope. *Mycoses* 2001; **44**: 13–21.
- 626 Colombo AL, Padovan ACB, Chaves GM. Current knowledge of *Trichosporon* spp. and *Trichosporonosis*. *Clin Microbiol Rev* 2011; **24**: 682–700.
- 627 Erer B, Galimberti M, Lucarelli G, *et al.* *Trichosporon beigellii* : a life-threatening pathogen in immunocompromised hosts. *Bone Marrow Transplantation* 2000; **25**: 745–9.
- 628 Nakagawa T, Nakashima K, Takaiwa T, Negayama K. *Trichosporon cutaneum* (*Trichosporon asahii* ) infection mimicking hand eczema in a patient with leukemia. *Journal of the American Academy of Dermatology* 2000; **42**: 929–31.
- 629 Callinan APL, Westcott JM. Vertical distribution of trichostrongylid larvae on herbage and in soil. *International Journal for Parasitology* 1986; **16**: 241–4.
- 630 Sevimli F. Checklist of small ruminant gastrointestinal nematodes and their geographical distribution in Turkey. *Turkish Journal of Veterinary and Animal Sciences* 2013; **37**: 369–79.
- 631 Bradbury R. An imported case of trichostrongylid infection in Tasmania and a review of human trichostrongylidiosis. *Annals of the ACTM: An International Journal of Tropical and Travel Medicine* 2006; **7**: 25.
- 632 Wall EC, Bhatnagar N, Watson J, Doherty T. An Unusual Case of Hypereosinophilia and Abdominal Pain: An Outbreak of *Trichostrongylus* Imported From New Zealand. *J Travel Med* 2011; **18**: 59–60.
- 633 McCarthy J, Moore TA. Emerging helminth zoonoses. *Int J Parasitol* 2000; **30**: 1351–60.

- 634 Brooker S, Clements ACA, Bundy D a. P. Global epidemiology, ecology and control of soil-transmitted helminth infections. *Adv Parasitol* 2006; **62**: 221–61.
- 635 Moraes RNR, Ribeiro MCT, Nogueira MCL, Cunha KC, Soares MMCN, Almeida MTG. First Report of *Tritirachium oryzae* Infection of Human Scalp. *Mycopathologia* 2010; **169**: 257–9.
- 636 Keating J, Yukich JO, Sutherland CS, Woods G, Tediosi F. Human African trypanosomiasis prevention, treatment and control costs: A systematic review. *Acta Tropica* 2015; **150**: 4–13.
- 637 Rassi A, Rassi A, Marin-Neto JA. Chagas heart disease: pathophysiologic mechanisms, prognostic factors and risk stratification. *Mem Inst Oswaldo Cruz* 2009; **104 Suppl 1**: 152–8.
- 638 Coura JR, Castro SL de. A Critical Review on Chagas Disease Chemotherapy. *Mem Inst Oswaldo Cruz* 2002; **97**: 3–24.
- 639 Safaei S, Fatahi-Bafghi M, Pouresmaeil O. Role of *Tsukamurella* species in human infections: first literature review. *New Microbes and New Infections* 2018; **22**: 6–12.
- 640 Arvin AM. Varicella-zoster virus. *Clin Microbiol Rev* 1996; **9**: 361–81.
- 641 Bergold GH, Munz K. Characterization of Piry virus. *Arch Gesamte Virusforsch* 1970; **31**: 152–67.
- 642 Tesh RB, Chaniotis BN, Johnson KM. Vesicular stomatitis virus (Indiana serotype): transovarial transmission by phlebotomine sandflies. *Science* 1972; **175**: 1477–9.
- 643 Reidl J, Klose KE. *Vibrio cholerae* and cholera: out of the water and into the host. *FEMS Microbiol Rev* 2002; **26**: 125–39.
- 644 Brayton PR, Bode RB, Colwell RR, et al. *Vibrio cincinnatiensis* sp. nov., a new human pathogen. *J Clin Microbiol* 1986; **23**: 104–8.
- 645 Yeung PSM, Boor KJ. Epidemiology, pathogenesis, and prevention of foodborne *Vibrio parahaemolyticus* infections. *Foodborne Pathog Dis* 2004; **1**: 74–88.
- 646 Strom MS, Paranjpye RN. Epidemiology and pathogenesis of *Vibrio vulnificus*. *Microbes Infect* 2000; **2**: 177–88.
- 647 Mishra SK, Ajello L, Ahearn DG, et al. Environmental mycology and its importance to public health. *Med Mycol* 1992; **30**: 287–305.
- 648 Edeson JFB, Wilson T. The Epidemiology of Filariasis Due to *Wuchereria Bancrofti* and *Brugia Malayi*. *Annu Rev Entomol* 1964; **9**: 245–68.
- 649 Downie AW, Taylor-Robinson CH, Caunt AE, Nelson GS, Manson-Bahr PEC, Matthews TCH. Tanapox: A New Disease Caused by a Pox Virus. *Br Med J* 1971; **1**: 363–8.
- 650 Cho CT, Wenner, Herbert A. Monkeypox Virus. *Bacteriological Reviews* 1973; **37**: 1–18.
- 651 Sabina Y, Rahman A, Ray RC, Montet D. *Yersinia enterocolitica*: Mode of Transmission, Molecular Insights of Virulence, and Pathogenesis of Infection. *J Pathog* 2011; **2011**: 429069.
- 652 Cafferkey MT, Sloane A, McCrae S, O'Morain CA. *Yersinia frederiksenii* infection and colonization in hospital staff. *Journal of Hospital Infection* 1993; **24**: 109–15.
- 653 Butler T, Islam M, Islam MR, et al. Isolation of *Yersinia enterocolitica* and *Y. intermedia* from fatal cases of diarrhoeal illness in Bangladesh. *Transactions of the Royal Society of Tropical Medicine and Hygiene* 1984; **78**: 449–50.
- 654 Perry RD, Fetherston JD. *Yersinia pestis*--etiologic agent of plague. *Clin Microbiol Rev* 1997; **10**: 35–66.
- 655 De Keukeleire S, De Bel A, Jansen Y, Janssens M, Wauters G, Piérard D. *Yersinia ruckeri*, an unusual microorganism isolated from a human wound infection. *New Microbes and New Infections* 2014; **2**: 134–5.

Table S2. SEM path model latent/composite and measurement variables: sample size (number of countries with data), indicator name, and description (Source: <https://data.worldbank.org/indicator> unless otherwise stated). Outer models are formative, meaning that the latent variables can be viewed as linear combinations of their respective measurement variable components.

| Latent variable                             | Sample size (# countries, in yr 2015 unless noted) | World bank indicator code (NA if different source) for each measurement variable | Description                                                                                                                                                                                                                                                                                                                                                                                                                                                                                                                                                                                                                                                                                                                                  |
|---------------------------------------------|----------------------------------------------------|----------------------------------------------------------------------------------|----------------------------------------------------------------------------------------------------------------------------------------------------------------------------------------------------------------------------------------------------------------------------------------------------------------------------------------------------------------------------------------------------------------------------------------------------------------------------------------------------------------------------------------------------------------------------------------------------------------------------------------------------------------------------------------------------------------------------------------------|
| Elevation                                   | 150 in yr 2010                                     | EN.POP.EL5M.ZS                                                                   | Population living in areas where elevation is below 5 meters (% of total population)                                                                                                                                                                                                                                                                                                                                                                                                                                                                                                                                                                                                                                                         |
| Elevation                                   | 164 in yr1995                                      | NA                                                                               | High elevation population: % population in Koeppen-Geiger zone h                                                                                                                                                                                                                                                                                                                                                                                                                                                                                                                                                                                                                                                                             |
| Political stability and absence of violence | 181                                                | PV.EST                                                                           | Perceptions of the likelihood of political instability and/or politically-motivated violence, including terrorism.                                                                                                                                                                                                                                                                                                                                                                                                                                                                                                                                                                                                                           |
| Land area in agriculture                    | 178                                                | AG.LND.CROP.ZS                                                                   | Permanent cropland (% of land area)                                                                                                                                                                                                                                                                                                                                                                                                                                                                                                                                                                                                                                                                                                          |
| Land area in agriculture                    | 180                                                | AG.LND.AGRI.ZS                                                                   | Agricultural land (% of land area)                                                                                                                                                                                                                                                                                                                                                                                                                                                                                                                                                                                                                                                                                                           |
| Land area in agriculture                    | 180                                                | AG.LND.ARBL.ZS                                                                   | Arable land (% of land area)                                                                                                                                                                                                                                                                                                                                                                                                                                                                                                                                                                                                                                                                                                                 |
| Biodiversity                                | 180                                                | AG.LND.FRST.ZS                                                                   | Forest area (% of land area)                                                                                                                                                                                                                                                                                                                                                                                                                                                                                                                                                                                                                                                                                                                 |
| Biodiversity                                | 181 in yr 2014                                     | ER.PTD.TOTL.ZS                                                                   | Terrestrial and marine protected areas (% of total territorial area)                                                                                                                                                                                                                                                                                                                                                                                                                                                                                                                                                                                                                                                                         |
| Biodiversity                                | 169 in yr 2012                                     | NA                                                                               | Species richness of birds*                                                                                                                                                                                                                                                                                                                                                                                                                                                                                                                                                                                                                                                                                                                   |
| Biodiversity                                | 169 in yr 2012                                     | NA                                                                               | Species richness of mammals*                                                                                                                                                                                                                                                                                                                                                                                                                                                                                                                                                                                                                                                                                                                 |
| Biodiversity                                | 169 in yr 2012                                     | NA                                                                               | Species richness of amphibians*                                                                                                                                                                                                                                                                                                                                                                                                                                                                                                                                                                                                                                                                                                              |
| Latitude                                    | 181                                                | NA                                                                               | Absolute latitude in degrees                                                                                                                                                                                                                                                                                                                                                                                                                                                                                                                                                                                                                                                                                                                 |
| Health care access                          | 177                                                | SH.XPD.CHEX.PC.CD                                                                | Current health expenditure per capita (current US\$)                                                                                                                                                                                                                                                                                                                                                                                                                                                                                                                                                                                                                                                                                         |
| Health care access                          | 181                                                | SH.IMM.MEAS                                                                      | Immunization, measles (% of children ages 12-23 months)                                                                                                                                                                                                                                                                                                                                                                                                                                                                                                                                                                                                                                                                                      |
| Health care access                          | 89                                                 | WHO Composite coverage index (%)                                                 | A weighted score reflecting coverage of eight RMNCH interventions along the continuum of care: demand for family planning satisfied (modern methods); antenatal care coverage (at least four visits); births attended by skilled health personnel; BCG immunization coverage among one-year-olds; measles immunization coverage among one-year-olds; DTP3 immunization coverage among one-year-olds; children aged less than five years with diarrhea receiving oral rehydration therapy and continued feeding; and children aged less than five years with pneumonia symptoms taken to a health facility. Source: <a href="http://apps.who.int/gho/data/node.imr.cci2030?lang=en">http://apps.who.int/gho/data/node.imr.cci2030?lang=en</a> |
| Rural poor livelihood                       | 180                                                | SH.STA.BASS.ZS                                                                   | People using at least basic sanitation services (% of population)                                                                                                                                                                                                                                                                                                                                                                                                                                                                                                                                                                                                                                                                            |
| Rural poor livelihood                       | 181                                                | SP.DYN.TFRT.IN                                                                   | Fertility rate, total (births per woman)                                                                                                                                                                                                                                                                                                                                                                                                                                                                                                                                                                                                                                                                                                     |
| Rural poor livelihood                       | 180                                                | SP.RUR.TOTL.ZS                                                                   | Rural population (% of total population)                                                                                                                                                                                                                                                                                                                                                                                                                                                                                                                                                                                                                                                                                                     |

|                                       |                  |                   |                                                                                                                                                                                                                                                                                                                                                                                                                                                                                                                                                                                                                                                                                                                                                                                                                                                  |
|---------------------------------------|------------------|-------------------|--------------------------------------------------------------------------------------------------------------------------------------------------------------------------------------------------------------------------------------------------------------------------------------------------------------------------------------------------------------------------------------------------------------------------------------------------------------------------------------------------------------------------------------------------------------------------------------------------------------------------------------------------------------------------------------------------------------------------------------------------------------------------------------------------------------------------------------------------|
| Agricultural yield in kcal per person | 173 in yr2013    | NA                | FAO food balance sheet: <a href="http://www.fao.org/faostat/en/#data/FBS">http://www.fao.org/faostat/en/#data/FBS</a><br>The total quantity of foodstuffs produced in a country added to the total quantity imported and adjusted to any change in stocks since the beginning of the reference period gives the supply. On the utilization side: separated by quantities exported, fed to livestock, used for seed, put to manufacture for food use and non-food uses, losses during storage and transportation, and food supplies available for human consumption. The per caput supply of each such food item available for human consumption is obtained by dividing the respective quantity by the population actually partaking of it. Data on per caput food supplies are expressed in terms of caloric value and protein and fat content. |
| Malnutrition                          | 143              | SN.ITK.DEFC.ZS    | Prevalence of undernourishment (% of population)                                                                                                                                                                                                                                                                                                                                                                                                                                                                                                                                                                                                                                                                                                                                                                                                 |
| Lifespan                              | 181              | SP.DYN.LE00.IN    | Life expectancy at birth, total (years)                                                                                                                                                                                                                                                                                                                                                                                                                                                                                                                                                                                                                                                                                                                                                                                                          |
| Wealth                                | 58               | SI.POV.DDAY       | Poverty headcount ratio at \$1.90 a day (2011 PPP) (% of population)                                                                                                                                                                                                                                                                                                                                                                                                                                                                                                                                                                                                                                                                                                                                                                             |
| Wealth                                | 173              | NY.GNP.PCAP.PP.CD | GNI per capita, PPP (current international \$)                                                                                                                                                                                                                                                                                                                                                                                                                                                                                                                                                                                                                                                                                                                                                                                                   |
| Tropical climate                      | 164 in yr1995    | NA                | Tropical population: % 1995 pop in Koeppen-Geiger tropics (Af+Am+Aw); source: <a href="https://www.pdx.edu/econ/country-geography-data">https://www.pdx.edu/econ/country-geography-data</a>                                                                                                                                                                                                                                                                                                                                                                                                                                                                                                                                                                                                                                                      |
| Tropical climate                      | 164 in yr1995    | NA                | Temperate population: % 1995 pop in Koeppen-Geiger temperate zones (Cf+Cs+Df+DW); source: <a href="https://www.pdx.edu/econ/country-geography-data">https://www.pdx.edu/econ/country-geography-data</a>                                                                                                                                                                                                                                                                                                                                                                                                                                                                                                                                                                                                                                          |
| Tropical climate                      | 178 in yr1961-99 | NA                | Country_precipitationCRU: mean precipitation by country for the period 1961-1999. Values are in millimeters (mm); source: <a href="http://data.worldbank.org/developers/climate-data-api">http://data.worldbank.org/developers/climate-data-api</a>                                                                                                                                                                                                                                                                                                                                                                                                                                                                                                                                                                                              |
| Tropical climate                      | 178 in yr1961-99 | NA                | Country_temperatureCRU: mean temperatures by country for the period 1961-1999. Values are in degrees Celsius; source: <a href="http://data.worldbank.org/developers/climate-data-api">http://data.worldbank.org/developers/climate-data-api</a>                                                                                                                                                                                                                                                                                                                                                                                                                                                                                                                                                                                                  |
| Total land area                       | 181              | AG.LND.TOTL.K2    | Land area is a country's total area, excluding area under inland water bodies, national claims to continental shelf, and exclusive economic zones. In most cases the definition of inland water bodies includes major rivers and lakes.                                                                                                                                                                                                                                                                                                                                                                                                                                                                                                                                                                                                          |

\* Average species richness across all of a country's 10 x 10 km grid cells derived from (Jenkins, Pimm et al. 2013) as also presented in (Wood, McInturff et al. 2017)



Table S3. Global burden of environmentally mediated and direct-contact transmitted infectious diseases across cause categories. Disability Adjusted Life Years (DALYs) lost globally in 2015 due the category I.A: “Communicable, maternal, perinatal and nutritional conditions: Infectious and parasitic diseases” of the World Health Organization’s Global Health Estimates (<https://www.who.int/data/gho/data/themes/mortality-and-global-health-estimates>)

| Transmission category                                                       | WHO Global Health Estimates category        | WHO category description                                                                                                                                           | Global DALYs (thousands) | %total classifiable DALYs |
|-----------------------------------------------------------------------------|---------------------------------------------|--------------------------------------------------------------------------------------------------------------------------------------------------------------------|--------------------------|---------------------------|
| Environmentally mediated infectious diseases                                | I.A.1                                       | Tuberculosis ( <i>M. bovis</i> )                                                                                                                                   | 1,569                    | 0.5%                      |
|                                                                             | I.A.4                                       | Diarrheal disease (subset of environmentally-transmitted causes tracked: e.g. <i>Shigella</i> spp., <i>Salmonella</i> spp., <i>Vibrio cholera</i> , Norwalk virus) | 46,456                   | 13.9%                     |
|                                                                             | I.A.5.d                                     | Childhood cluster diseases: Tetanus                                                                                                                                | 4,681                    | 1.4%                      |
|                                                                             | I.A.6                                       | Meningitis (subset of environmentally-transmitted causes tracked: e.g. <i>Naegleria fowleri</i> , <i>Cryptococcus neoformans</i> , <i>Histoplasma capsulatum</i> ) | 7,562                    | 2.3%                      |
|                                                                             | I.A.7                                       | Encephalitis (subset of environmentally-transmitted viruses tracked: e.g. Japanese encephalitis virus, Louping ill virus)                                          | 6,050                    | 1.8%                      |
|                                                                             | I.A.8.a                                     | Acute Hepatitis A                                                                                                                                                  | 1,044                    | 0.3%                      |
|                                                                             | I.A.8.d                                     | Acute Hepatitis E                                                                                                                                                  | 2,525                    | 0.8%                      |
|                                                                             | I.A.10.a                                    | Parasitic and vectorborne disease: Malaria                                                                                                                         | 38,520                   | 11.5%                     |
|                                                                             | I.A.10.b                                    | Parasitic and vectorborne disease: Trypanosomiasis                                                                                                                 | 372                      | 0.1%                      |
|                                                                             | I.A.10.c                                    | Parasitic and vectorborne disease: Chagas                                                                                                                          | 253                      | 0.1%                      |
|                                                                             | I.A.10.d                                    | Parasitic and vectorborne disease: Schistosomiasis                                                                                                                 | 3,541                    | 1.1%                      |
|                                                                             | I.A.10.e                                    | Parasitic and vectorborne disease: Leishmaniasis                                                                                                                   | 1,357                    | 0.4%                      |
|                                                                             | I.A.10.f                                    | Parasitic and vectorborne disease: Lymphatic filariasis                                                                                                            | 2,071                    | 0.6%                      |
|                                                                             | I.A.10.g                                    | Parasitic and vectorborne disease: Onchocerciasis                                                                                                                  | 1,136                    | 0.3%                      |
|                                                                             | I.A.10.h                                    | Parasitic and vectorborne disease: Cysticercosis                                                                                                                   | 1,857                    | 0.6%                      |
|                                                                             | I.A.10.i                                    | Parasitic and vectorborne disease: Echinococcosis                                                                                                                  | 642                      | 0.2%                      |
|                                                                             | I.A.10.j                                    | Parasitic and vectorborne disease: Dengue                                                                                                                          | 2,613                    | 0.8%                      |
|                                                                             | I.A.10.k                                    | Parasitic and vectorborne disease: Trachoma                                                                                                                        | 279                      | 0.1%                      |
|                                                                             | I.A.10.l                                    | Parasitic and vectorborne disease: Yellow fever                                                                                                                    | 856                      | 0.3%                      |
| I.A.10.m                                                                    | Parasitic and vectorborne disease: Rabies   | 1,672                                                                                                                                                              | 0.5%                     |                           |
| I.A.11.a-c                                                                  | Intestinal nematodes                        | 3,395                                                                                                                                                              | 1.0%                     |                           |
| I.A.11.d                                                                    | Foodborne trematodes                        | 1,066                                                                                                                                                              | 0.3%                     |                           |
| <b>Subtotal: DALYs caused by environmentally transmitted infections</b>     |                                             |                                                                                                                                                                    | <b>129,488</b>           | <b>38.7%</b>              |
| Non-environmentally mediated infectious diseases                            | I.A.1                                       | Tuberculosis ( <i>M. mycobacterium</i> )                                                                                                                           | 54,468                   | 16.3%                     |
|                                                                             | I.A.2.a                                     | STDs excluding HIV: Syphilis                                                                                                                                       | 8,065                    | 2.4%                      |
|                                                                             | I.A.2.b                                     | STDs excluding HIV: Chlamydia                                                                                                                                      | 955                      | 0.3%                      |
|                                                                             | I.A.2.c                                     | STDs excluding HIV: Gonorrhoea                                                                                                                                     | 1,187                    | 0.4%                      |
|                                                                             | I.A.2.d                                     | STDs excluding HIV: Trichomoniasis                                                                                                                                 | 173                      | 0.1%                      |
|                                                                             | I.A.2.e                                     | STDs excluding HIV: Genital Herpes                                                                                                                                 |                          | 0.1%                      |
|                                                                             | I.A.2.f                                     | STDs excluding HIV: Other STDs                                                                                                                                     | 734                      | 0.2%                      |
|                                                                             | I.A.3                                       | HIV/AIDS                                                                                                                                                           | 91,907                   | 27.4%                     |
|                                                                             | I.A.4                                       | Diarrheal disease (subset of contagious causes tracked: e.g. Rotavirus C/F, Human adenovirus A-F)                                                                  | 45,177                   | 13.5%                     |
|                                                                             | I.A.5.a                                     | Childhood cluster diseases: Whooping cough                                                                                                                         | 6,142                    | 1.8%                      |
|                                                                             | I.A.5.b                                     | Childhood cluster diseases: Diphtheria                                                                                                                             | 223                      | 0.1%                      |
|                                                                             | I.A.5.c                                     | Childhood cluster diseases: Measles                                                                                                                                | 11,531                   | 3.4%                      |
|                                                                             | I.A.6                                       | Meningitis (subset of contagious causes tracked: e.g. meningococcal meningitis, pneumococcal meningitis, <i>Haemophilus influenzae</i> )                           | 20,373                   | 6.1%                      |
|                                                                             | I.A.8.b                                     | Acute hepatitis B                                                                                                                                                  | 6,416                    | 1.9%                      |
|                                                                             | I.A.8.c                                     | Acute hepatitis C                                                                                                                                                  | 1,270                    | 0.4%                      |
|                                                                             | I.A.10.h                                    | Parasitic and vectorborne disease: Leprosy                                                                                                                         | 257                      | 0.1%                      |
| I.A.10.j                                                                    | Parasitic and vectorborne disease: Trachoma | 299                                                                                                                                                                | 0.1%                     |                           |
| <b>Subtotal: DALYs caused by non-environmentally transmitted infections</b> |                                             |                                                                                                                                                                    | <b>205,353</b>           | <b>61.3%</b>              |
| Unclassifiable DALYs                                                        | I.A.12                                      | <b>Other infectious diseases (not clearly classifiable by DALYs): mixed causes</b>                                                                                 | <b>24,500</b>            | --                        |
| <b>Total DALYs</b>                                                          |                                             | <b>Total DALYs</b>                                                                                                                                                 | <b>359,341</b>           | <b>100%</b>               |

Table S4. Full and reduced PLS-SEM model structure (in matrix form): a “1” in the cell indicates a direct path (connecting “from” row “to” column) was hypothesized and therefore included in the full model. Asterisks indicate the subset of variables included in the reduced model after bootstrapping whereby we identified and excluded those paths with low support, i.e. those with  $p > 0.1$  in the full model. An underline underneath the 1 indicates that a path was included in the reduced model, but not shown in Figure 4, for simplicity, because it was a “dead-end” path, in that there was neither a direct nor indirect significant path that led to environmentally mediated or directly transmitted disease burdens (the outcomes of interest). See figure S2 for the reduced (final) model depicting all the asterisked paths.

|                          | Land area in agriculture | Biodiversity | Directly transmitted | Environmentally mediated | Elevation | Agricultural yield | Health care access | Latitude | Life expectancy | Malnutrition | More tropical climate | Political stability | Rural livelihood | Total land area | Wealth |
|--------------------------|--------------------------|--------------|----------------------|--------------------------|-----------|--------------------|--------------------|----------|-----------------|--------------|-----------------------|---------------------|------------------|-----------------|--------|
| Land area in agriculture |                          | 1            | 1                    | 1                        |           | 1                  |                    |          |                 | 1            |                       |                     | 1                |                 |        |
| Biodiversity             |                          |              |                      | <u>1*</u>                |           |                    |                    |          |                 |              |                       |                     |                  |                 |        |
| Directly transmitted     |                          |              |                      |                          |           |                    |                    |          | <u>1*</u>       |              |                       |                     |                  |                 |        |
| Environmentally mediated |                          |              |                      |                          |           |                    |                    |          | <u>1*</u>       |              |                       |                     |                  |                 |        |
| Elevation                | 1                        | 1            | 1                    | 1                        |           | 1                  |                    |          |                 |              | 1                     |                     |                  |                 | 1      |
| Agricultural yield       |                          | 1            | 1                    | 1                        |           |                    |                    |          | 1               | 1            |                       |                     | 1                |                 |        |
| Health care access       |                          |              | 1                    | <u>1</u>                 |           |                    |                    |          | <u>1*</u>       | 1            |                       |                     | 1*               |                 |        |
| Latitude                 | 1                        | 1            | 1                    | 1                        |           | <u>1*</u>          |                    |          | 1               |              | 1*                    |                     |                  |                 | 1*     |
| Life expectancy          |                          |              |                      |                          |           |                    |                    |          |                 |              |                       |                     |                  |                 |        |
| Malnutrition             |                          |              | <u>1*</u>            | 1                        |           |                    |                    |          | 1               |              |                       |                     |                  |                 |        |
| More tropical climate    | 1                        | <u>1*</u>    | 1                    | 1                        |           | <u>1*</u>          |                    |          |                 |              |                       |                     | 1*               |                 | 1      |
| Political stability      |                          |              | 1                    | 1                        |           |                    | 1*                 |          |                 | 1            |                       |                     |                  |                 | 1*     |
| Rural livelihood         |                          |              | <u>1*</u>            | <u>1*</u>                |           |                    |                    |          | <u>1*</u>       | <u>1*</u>    |                       |                     |                  |                 |        |
| Total land area          | 1                        | 1            | 1                    | 1                        |           | <u>1*</u>          |                    |          | 1               |              |                       |                     | 1                |                 | 1      |
| Wealth                   | 1                        | 1            | 1                    | <u>1*</u>                |           | 1                  | 1*                 |          | <u>1*</u>       | 1            |                       |                     | 1*               |                 |        |

Table S5. Reduced (final) model fits, R<sup>2</sup> for each variable fit

|                                                                 | R Square     | R Square Adjusted |
|-----------------------------------------------------------------|--------------|-------------------|
| Ag yield in kCal per person                                     | 0.146        | 0.132             |
| Biodiversity                                                    | 0.244        | 0.239             |
| <b>Direct-contact infectious burden</b>                         | <b>0.411</b> | <b>0.405</b>      |
| <b>Environmentally mediated infectious burden</b>               | <b>0.631</b> | <b>0.624</b>      |
| Health care access                                              | 0.546        | 0.541             |
| Life expectancy                                                 | 0.905        | 0.902             |
| Malnutrition (undernutrition)                                   | 0.349        | 0.346             |
| More tropical climate                                           | 0.758        | 0.757             |
| Rural livelihood – rurality, poor sanitation,<br>high fertility | 0.630        | 0.624             |
| Wealth                                                          | 0.359        | 0.352             |

Figure S1. Latitudinal range limits of direct-contact transmitted and environmentally mediated infectious diseases. Graphs show total number of diseases reported from each country (ISO codes), organized by increasing absolute latitude of the country centroids along the x axis. A) top panel shows total number of directly transmitted versus environmentally mediated diseases with >0 burden in each country (moving average spline), and B) bottom two panels show identities of directly transmitted (middle panel) and environmentally mediated (bottom panel) infectious diseases with >0 burden in each country, displayed as stacked bars. Diseases are represented in the stacked bar plots in alphabetical order from bottom to top, with the key below. Environmentally mediated infectious disease ranges appear more limited by increasing latitude (more of them are absent from countries at higher latitudes) than direct-contact transmitted diseases.

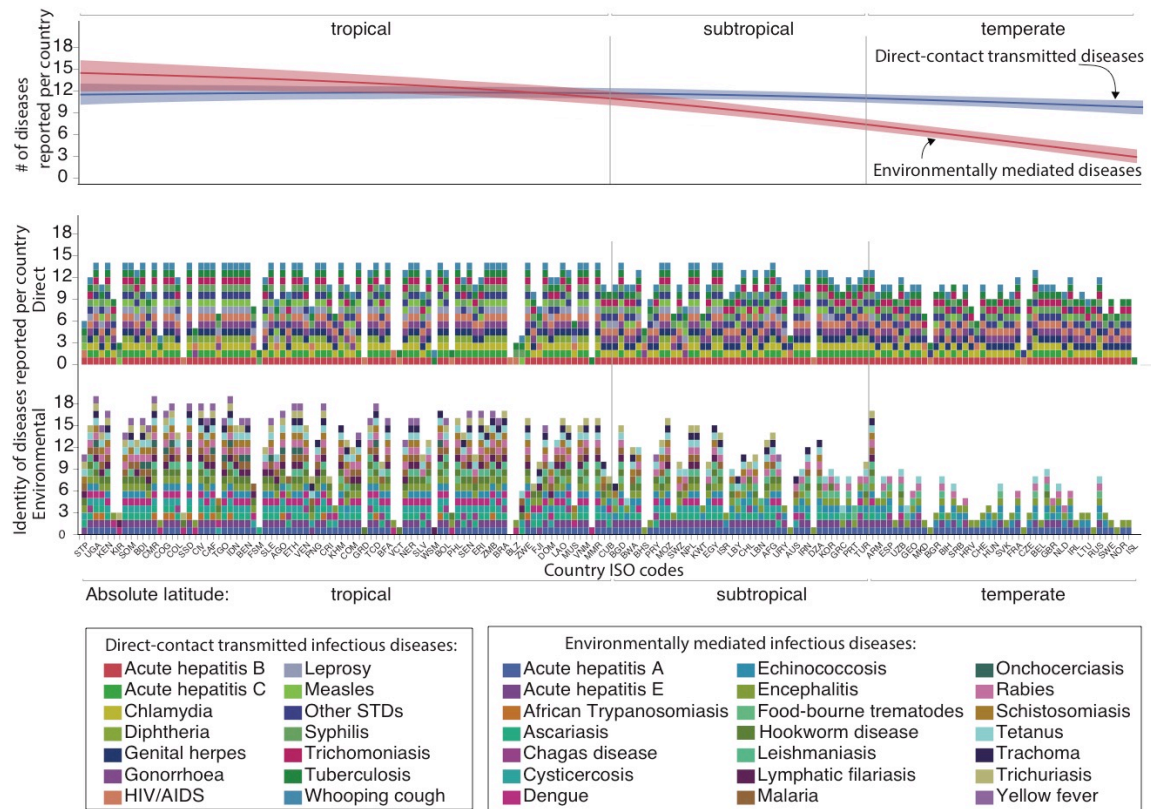

Figure S2. PLS-SEM results: reduced model all paths. Statistically significant paths links are shown in red for negative associations, black for positive associations, and grey for marginally significant ( $p > 0.05$  but  $< 0.1$ ) paths among the variables linked by those lines. Numbers along paths (and also path thickness) correspond to the weighted correlation coefficients which signify the strength of the association between two linked variables; total effects can be estimated by multiplying path coefficients along one or more segments, and summing across all possible paths. Total significant effects on disease burdens are summarized in Table 2; Paths with  $p > 0.1$  were removed from the full model to produce the final reduced model shown here (see Table 3 in the main text). A simplified version of this figure is shown in the main text Figure 4 (with only those paths that link to the main outcomes of interest, directly transmitted or environmentally mediated infectious diseases, with  $p < 0.05$ ). Artwork credit: N. Nova.

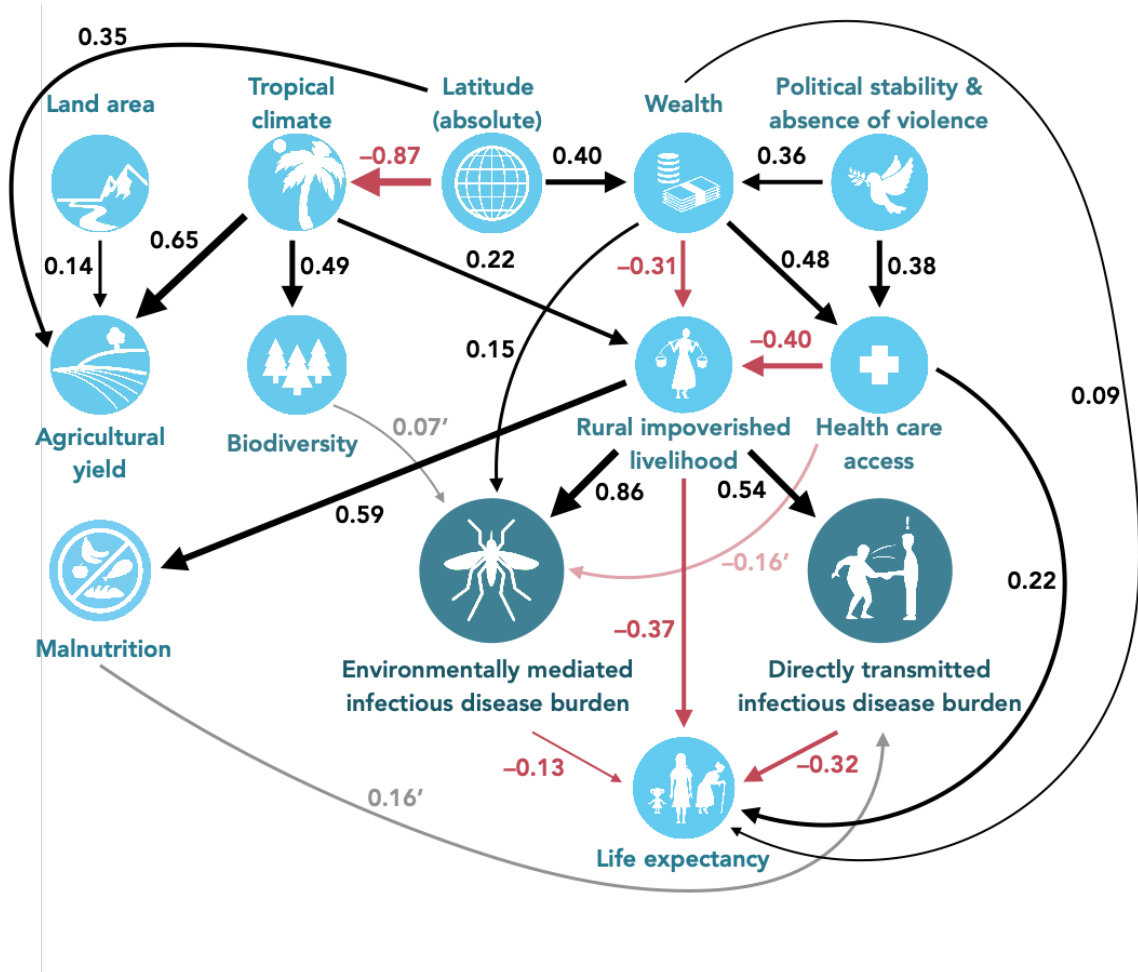

Supplement: mmc1.pdf [file mmc1.pdf]
